# Supplementary material for: Sprouty2 loss‐induced IL6 drives castration‐resistant prostate cancer through scavenger receptor B1
Source: PubMed Central journal article supplement (PMC5887544; doi:10.15252/emmm.201708347), 2018-03-14
Supplement: EMMM-10-e8347-s001.pdf [file EMMM-10-e8347-s001.pdf]

## **APPENDIX**

### **TITLE**

**Sprouty2 loss induced IL6 drives castration-resistant prostate cancer through scavenger receptor B1**

### **AUTHORS**

Rachana Patel\*, Janis Fleming, Ernest Mui, Carolyn Loveridge, Peter Repiscak, Arnaud Blomme, Victoria Harle, Mark Salji, Imran Ahmad, Katy Teo, Freddie C. Hamdy, Ann Hedley, Niels van den Broek, Gillian Mackay, Joanne Edwards, Owen J. Sansom and Hing Y. Leung\*

\* Corresponding authors

### **TABLE OF CONTENT**

|    |                                         |
|----|-----------------------------------------|
| 1. | Appendix Information (detailed methods) |
| 2. | Appendix Figures (S1, S2 & S3)          |
| 3. | Appendix Legends                        |
| 4. | Appendix Tables S1, S2                  |

1 **Appendix Supplementary Information:**

2 **Study approval-** All the animal experiments conducted for this study were carried out with  
3 ethical approval from University of Glasgow under the revised Animal (Scientific  
4 Procedures) Act 1986 and the EU Directive 2010/63/EU (PPL 30/3185). Animals were  
5 housed in individual ventilated cages in a barrier facility proactive in environmental  
6 enrichment. Tissue Microarrays (TMAs) were already available for analyses from a previous  
7 study. In brief, patients were retrospectively identified from Greater Glasgow and Clyde  
8 NHS Trust and retrieved from the pathology archives. Patients were diagnosed between 1993  
9 and 2002 and were only included if samples were surplus to diagnostic need and sufficient  
10 material was available for TMA construction. Areas of low and high Gleason score were  
11 identified by pathologist to address tumour heterogeneity and 0.6 mm<sup>2</sup> cancer cores were  
12 taken from each area for TMA construction. TMAs were constructed in triplicate resulting in  
13 6 cores being available for analysis for each patient. Ethical approval was gained from the  
14 West of Scotland Research Ethics Committed (05/S0704/94). An informed consent was  
15 obtained from all subjects and that the experiments conformed to the principles set out in the  
16 WMA Declaration of Helsinki and the Department of Health and Human Services Belmont  
17 Report.

18

19 **Cell lines-** All the human normal (RWPE-1) and prostate cancer (CWR22Res, CWR22RV1,  
20 LNCaP, LNCaP AI and VCaP) cell lines were mycoplasma negative, authenticated by LGC  
21 standards. CWR22Res and CWR22RV1 (22RV1) cells are cell lines derived from CWR-22  
22 xenografts (Nagabhushan et al, 1996). CWR22Res cells (hormone responsive variant of  
23 CWR22 cells) were obtained from Case Western Reserve University, Cleveland, Ohio.  
24 RWPE-1 (ATCC® CRL-11609™), LNCaP (ATCC® CRL-1740™), VCaP (ATCC® CRL-

25 2876<sup>TM</sup>) and CWR22RV1 (22RV1) (ATCC® CRL-2505<sup>TM</sup>; the CRPC variant of CWR22)  
26 (Sramkoski et al, 1999) were obtained from ATCC. RWPE-1 cells were maintained in  
27 Keratinocyte Serum Free Medium (K-SFM) (Invitrogen GIBCO: 17005-042) with (bovine  
28 pituitary extract (BPE) and human recombinant epidermal growth factor (EGF). CWR22Res,  
29 LNCaP and VCaP prostate cancer cells were grown in RPMI with glutamine containing 10%  
30 FBS. The androgen independent LNCaP AI cell line and CWR22RV1 were used as a model  
31 to study the effects of chronic androgen deprivation treatment. LNCaP AI cells (generated  
32 from LNCaP cells through chronic steroid deprivation over a period of 9 months mimicking  
33 androgen deprivation therapy were donated by Professor Craig Robson, University of  
34 Newcastle) were grown in phenol red free RPMI with glutamine containing 10% charcoal  
35 stripped (steroid depleted) serum. CWR22RV1 cells were also maintained in phenol red free  
36 RPMI medium with glutamine containing 10% charcoal stripped (steroid depleted) serum.  
37 The STR cell line authentication of CWR22Res and CWR22RV1 was done using Qiagen  
38 Puregene Core Kit B for gDNA extraction with Promega Geneprint 10 kit for PCR and  
39 Genemapper v4 software for gene fragment analysis on 3130xl Genetic Analyser (Applied  
40 Biosystems) (Appendix table 1).

41 LNCaP-SPRY2 cells were generated by transfecting LNCaP cells with human SPRY2  
42 expressing plasmid (pCDNA3.1) as described previously (Patel et al, 2013). Stable Sprouty2  
43 (SPRY2) knockdown in CWR22Res cells was achieved using pTER<sup>+</sup> plasmid with hairpin  
44 targeting SPRY2 as previously described (Patel et al, 2013) with nucleofection (Lonza-kit V).  
45 CWR22Res cells stably expressing shSPRY2 (Clones- CL3 and Pool) and shNsi (non-  
46 targeting scrambled shRNA) were selected using zeocin (300 µg/ml; Invitrogen). Stable  
47 shHER2 knockdown clones were generated by transfecting shHER (SantaCruz  
48 Biotechnology- sc-94978-SH) and shscram (SantaCruz Biotechnology- sc-108060) in  
49 CWR22Res cells stably expressing shNsi or shSPRY2 (Pool). The HSD3B1 and SRB1 knock

50 out CWR22Res cells were generated using CRISPR-Cas9 technology from Santa Cruz  
51 Biotechnology: HSD3B1 CRISPR/Cas9 KO Plasmid (sc-400825), HSD3B1 HDR Plasmid  
52 (sc-400825-HDR), SR-B1 CRISPR/Cas9 KO Plasmid (sc-400990) and SR-B1 HDR Plasmid  
53 (sc-400990-HDR). The PTEN siRNA (6251) and control siRNA (6568) was obtained from  
54 Cell Signaling. siRNA transfection was carried out with nucleofection (Lonza-kit V).

55 The pre-adipocyte 3T3-L1 cells (gift from Dr Ian Salt, Institute of Cardiovascular and  
56 Medical Sciences, University of Glasgow) were differentiated into adipocytes using  
57 adipocyte differentiation protocol. Briefly, to differentiate the 3T3-L1 fibroblast cells into  
58 adipocytes, the cells were grown to confluency and fed at confluency in DMEM with 10%  
59 newborn calf serum (NCS). At 48 hr post-confluence, cell medium was aspirated and  
60 replaced with differentiation medium consisting of DMEM with 10% fetal calf serum (FCS)  
61 containing dexamethasone, methyl isobutylxanthine (IBMX), troglitazone and insulin. After a  
62 further three days, this medium was aspirated and replaced with DMEM containing 10% FCS  
63 containing troglitazone and insulin only. The cells were incubated in this medium for a  
64 further three days, and then the medium was aspirated and replaced with DMEM containing  
65 10% FCS (no other additions). At 8-12 days, post-induction of differentiation, cells were  
66 used for experimentation.

67 For growth rate assays, equal number of cells was seeded and counted using the CASY® cell  
68 counter (Innovatis) at two and four days post treatment. The treatments were initiated 12 hr  
69 after seeding the cells. The growth rate was calculated relative to the cell count at time 0 (T<sub>0</sub>,  
70 Day 0) i.e., cell number obtained at the time of treatment. The IC<sub>50</sub> of ITX5061 was  
71 calculated using WST-1 reagent (Roche) to assay cell viability after 48 hr of treatment. The  
72 ITX5061 dose response was analysed relative to respective DMSO. IC<sub>50</sub> was calculated

73 using log (inhibitor) vs. response -- Variable slope (four parameters) with Bottom  
74 constraint=0.0 with GaphPad Prism software.

75

76 **Immunohistochemistry and Immunoblotting** – Immunohistochemical (IHC) and  
77 immunoblotting was performed as previously described (Patel et al, 2013). The additional  
78 antibodies used for IHC were SPRY2 (Abcam, ab60719- 1:1000 dilution for  
79 immunoblotting), AR (Santa Cruz Biotechnology, sc-816- - 1:1000 dilution for  
80 immunoblotting and 1:100 dilution for IHC), IL6 (Abcam, ab6672- 1:60 dilution for IHC),  
81 HSD3B1 (Abcam, ab55268 (for human samples- 1:1000 dilution); ab65156 (for mouse  
82 samples- 1:1000 dilution), Perilipin (Cell Signaling Technology, 9349- 1:1000 dilution),  
83 Phospho-(Ser/Thr) PKA substrate (Cell Signaling Technology, 9621- 1:1000 dilution),  
84 cleaved caspase 3 (Cell Signaling Technology, 9661- 1:50 dilution for IHC), HSC70 (Santa  
85 Cruz Biotechnology, sc-7298- 1:1000 dilution), p-p38 (Cell Signaling Technology, 4511-  
86 1:1000 dilution for immunoblotting and 1:50 dilution for IHC), HER2 (Cell Signaling  
87 Technology, 2165- 1:50 dilution for IHC), EGFR (Cell Signaling Technology, 4405- 1:1000  
88 dilution for immunoblotting), SRB1 (Novus Biologicals, NB400-104- 1:50 dilution for IHC  
89 and 1:1000 dilution for immunoblotting), HSC70 (Santa Cruz Biotechnology, sc- sc-7298-  
90 1:1000 dilution for immunoblotting) and GAPDH (Sigma, G9295- 1:10,000 dilution for  
91 immunoblotting).

92

93 **Human tissue microarray-** The matched tissue microarray (TMA) comprised of formalin-  
94 fixed, paraffin-embedded (FFPE) prostate cancer sections from 35 hormone naïve prostate  
95 cancer (HNPC) at diagnosis and castration-resistant prostate cancer (CRPC) matched prostate  
96 cancer patients (Tan et al, 2011). Hormone naïve samples are primary prostate tumour tissues

97 before the patients received ADT and the matched CRPC samples are primary prostate  
98 tumour tissue from the same individuals after biochemical evidence (rise in serum PSA) of  
99 CRPC. In this TMA, the patients have received only ADT treatment. Ethical approval was  
100 acquired from the Multicentre Research Ethics Committee for Scotland (MREC/01/0/36) and  
101 Local Research and Ethics Committees. These patients were selected based on their initial  
102 response to hormone treatment (sub capsular bilateral orchidectomy or LHRH agonist +/-  
103 antiandrogens) and their subsequent relapse (2 rises in PSA >10%). CRPC samples were  
104 gained by TURP as a result of relieving bladder outflow obstruction. Clinico-pathological  
105 data available included age (69.5, IQR 64.5-74.8), Gleason sum score at diagnosis (median 8,  
106 range 6-9), Gleason sum score at relapse (median 9, range 8-9), serum prostate specific  
107 antigen (PSA) levels at diagnosis (34.5 ng/mL, IQR 9.9-130.5), and PSA at relapse (20  
108 ng/mL, IQR 4.5-39). All patients relapsed, with a median time to disease recurrence being 2.6  
109 years (IQR 1.7-4.8 years) and median overall survival being 5.5 years (IQR 3.4-7.2 years).  
110 The CRPC samples from this TMA were used for correlation analyses of PTEN and SPRY2.  
111 For assaying the effects of SPRY2 and SRB1 levels on response to treatment and survival,  
112 SRB1 IHC was performed in prostate cancer TMA which included diagnostic biopsies from  
113 90 prostate cancer patients treated with ADT, radiotherapy and chemotherapy. To assess the  
114 effects of SPRY2 on overall survival, patients treated with hormone therapy and evidence of  
115 biochemical relapse were selected (n=19). Patients were segregated into SPRY2 high (n=12)  
116 with IHC scores above the average median IHC score and SPRY2 low (n=7) with IHC scores  
117 below the average median IHC score. To assess the effects of SRB1 levels on treatment  
118 resistance and survival, 37 patients treated with ADT (n=37) were selected for further  
119 analyses. Out of these, 15 patients had prior surgeries and/or radiotherapy. To assess the time  
120 to biochemical relapse, patients with only ADT treatment (n=22) and no prior surgeries  
121 and/or radiotherapy were selected for analyses. To investigate the effects of SR-B1 levels on

122 the overall survival post-diagnosis, patients with biochemical evidence of CRPC (n=27) were  
123 selected for analyses. The CRPC samples from this TMA were used for IL6 correlations with  
124 HER2 and SPRY2.

125 The stained slides were scored by two independent observers blinded to clinical parameters,  
126 using a weighted histoscore method, also known as the H-score, at 40X magnification. For  
127 each stained section, the staining intensity and percentage of cells stained were scored. For  
128 semi-quantitative classification of staining intensity, the histoscore was calculated as  $(1 \times \% \text{ cells staining weakly positive}) + (2 \times \% \text{ cells staining moderately positive}) + (3 \times \% \text{ cells staining strongly positive})$ . The TMA cores with insufficient tissue to attribute IHC score  
130 were not included in further analyses.  
131

132

133 **Clinical datasets for gene alterations and survival analyses-** Relapse-free survival based  
134 on SPRY2 expression was queried using cBioPortal platform (Cerami et al, 2012; Gao et al,  
135 2013) for cancer genomics using TCGA, provisional prostate cancer dataset. The data was  
136 extracted and Kaplan-Meier survival curves were plotted in GraphPad Prism.

137

138 **Microarray-** mRNA was harvested from three biological replicates of CWR22Res prostate  
139 cancer cells with Nsi (non-silencing vector control) expression or stable SPRY2 knockdown  
140 (Pool). Samples for microarray were generated using Illumina sequencing reagents and  
141 HumanHT-12 v4 Expression BeadChip Kit. Microarray hybridisation was performed at BHF  
142 Glasgow Cardiovascular Research Centre (Taurino et al, 2010) and chips were scanned a  
143 BeadArray Reader (Illumina). Bioinformatics analyses were carried out at CRUK Beatson  
144 Institute, Glasgow, UK. The Illumina microarray data is deposited in Geo Gene Expression  
145 Omnibu: GEO Submission (GSE108456).

146

147 **Gene Set Enrichment Analyses (GSEA)-** GSEA was carried out using microarray data  
148 obtained from Nsi (non- silencing vector control) and stable SPRY2 deficient (Pool)  
149 CWR22Res cells. The GSEA v2.2.2 tool (Mootha et al, 2003; Subramanian et al, 2005) was  
150 used for analysis and GSEA was performed as follows: - All genes assessed by microarray  
151 were ranked using the difference of means scaled by the standard deviation (option  
152 Signal2Noise in the GSEA program) and weighted scoring scheme was used. A null  
153 distribution was created using the gene set permutation type and 1000 permutations. The  
154 ranked datasets were tested against gene sets termed 'C2: curated gene sets' and 'C5: GO gene  
155 sets' from Molecular Signatures Database (MSigDB) v5.1 as well as specifically against  
156 cytokine, lipase, lipid, lipoprotein and steroid related genesets extracted from MSigDB v5.1.

157

158 **Studies using clinical serum samples-** Serum samples from 172 patients with HNPC and  
159 129 patients with CRPC were obtained from ProMPT study (ethics committee approval: UK  
160 MREC number 01/4/61). All clinical information including serum PSA levels were obtained  
161 from patient medical records. IL6 was assayed in these serum samples in duplicates using  
162 R&D (S6050) human IL6 ELISA kits as per the kit protocol. Serum free fatty acid levels  
163 were assayed in duplicates using Abcam (ab65341) FFA colorimetric detection kit per  
164 protocol provided. Serum levels of PSA, FFA and IL6 levels were carried out in the same  
165 serum samples from individual patients. Data analyses were carried out using Graph Pad  
166 Prism software. The HN patient cohort (n=172) included patients with localised prostate  
167 cancer. Most of these HN patients (n=123) were untreated when the serum samples were  
168 collected for the analyses presented here. A subset of HN patients were treated with radical  
169 prostatectomy (n=41) and EBRT (external beam radiation therapy) (n=8). All patients in



170 CRPC cohort (n=129) showed clinical or biochemical disease progression post ADT  
171 treatment. Majority of CRPC patients (n=121) were treated with ADT alone while few were  
172 treated with EBRT (n=3) or radical prostatectomy (n=5) prior to ADT treatment. The  
173 retrospective patient records were used to acquire the data on PSA levels. For IL6 and PSA  
174 correlations, PSA values were obtained from the same serum samples (matched for sample  
175 collection date) from individual patients (n=42). Same criteria were applied for IL6 and free  
176 fatty acid (FFA) correlations. For this, FFA was measured in a subset of 18 ProMPT serum  
177 samples (9 each of HNCP and CRPC cases) previously used for IL6 analyses. For survival  
178 analyses, CRPC patients with no recorded evidence of metastases (M0) were selected.

179

180 **Genetically engineered mouse models (GEMM)-** *Nkx 3.1-Cre* (Hsieh et al, 2010) mice  
181 were crossed to those harbouring *Spry2<sup>fl/+</sup>* (Shim et al, 2005) and *Pten<sup>fl/+</sup>* (Lesche et al, 2002) ,  
182 and mice were genotyped by PCR by Transnetyx™. After approximately 50 weeks, the *Nkx*  
183 *3.1-Cre Pten<sup>fl/+</sup> Spry2<sup>fl/+</sup>* (NPS) developed palpable prostate tumours (Gao et al, 2012). The  
184 mice with palpable prostate tumours were randomised into two groups- mock (sham surgical  
185 incision) and androgen deprivation therapy (ADT) which was achieved by orchiectomy. A  
186 subset of mice (n=6) was euthanised at 1 month after (Mock or ADT) treatment, and  
187 prostates and lymph nodes were placed in formalin for 24 hr fixation before paraffin  
188 embedding. Rest the Mock (n=7) and ADT (n=6) treated mice were aged to clinical end  
189 point. The clinical end point, based on the Animal licence (PPL 30/3185), comprised of either  
190 loss of more than 20% of the pre-treatment body weight, sluggish behaviour, loss of mobility  
191 or excessive haematuria.

192 For anti-IL6 treatment, ADT treated mice were injected intraperitoneally twice weekly with a  
193 500 µg rat anti-murine IL-6 mAb (R&D- MAB406) or control antibody in 200 µl PBS for

194 four weeks after which the mice were euthanised, with the prostates collected and formalin  
195 fixed. For ITX5061 treatment, ADT treated mice were gavaged with 25 mg/kg/day ITX5061  
196 in 20% hydroxypropyl-Beta-cyclodextrin in 20 mM citric acid for a month after which the  
197 mice were euthanised, with the prostates collected and formalin fixed.

198

199 **Orthograft prostate cancer model-** Prostate orthograft model using CWR22Res cells was  
200 established. For prostate orthograft animal experiments, CD1-nude male mice (6 to 8 weeks  
201 old) were obtained from Charles River Research Models & Services (UK). A midline lower  
202 abdominal incision was made on the mice anesthetized by isoflurane inhalation. Using a 1-cc  
203 syringe with a 27-gauge needle,  $14 \times 10^6$  CWR22Res cells in 50  $\mu$ l of serum free phenol red  
204 free glutamine containing RPMI were injected in one of the anterior prostate lobes to form a  
205 localized bleb within the injected prostatic lobe. The mice with injections forming an intact  
206 prostatic bleb were retained for the study. The abdominal cavity was closed with surgical  
207 sutures and the outer skin was closed using surgical staples. Mice were treated with  
208 Carprofen (dose defined by the assigned veterinarian) as an analgesic agent prior to and 24 hr  
209 post-surgery. After 30 days when a palpable tumour was felt with 100% tumour incidence,  
210 the mice were randomised into two groups: Mock (sham surgical incision) and ADT  
211 (orchiectomy). For characterisation of the ADT treatment on CWR22Res cells, ultrasound  
212 based analysis was carried out at 30 days post intra-prostatic injections and at 60 days (i.e.,  
213 30 days post Mock or ADT treatment). The ultrasound *in vivo* imaging was carried out using  
214 Vevo 3100 Imaging System and prostate orthograft volume analyses was carried out using  
215 FUJIFILM VisualSonics, Inc software.

216 To study the effects of SPRY2 deficiency on treatment response, a pilot experiment with 5  
217 mice per treatment was performed. Here, approximately 14 million cells (Nsi control or

218 SPRY2 deficient clones –CL3 and Pool) were injected in one of the anterior prostate lobes of  
219 CD-1 nude mice. Ten mice per clone were used for this experiment. The orthografts were  
220 palpable around 30 days (4 weeks) post intra-prostatic injections with 100% incidence. These  
221 mice were then randomised to receive Mock or ADT treatment (n=5 per treatment). All  
222 mock-treated animals achieved maximum permitted tumour burden around 73 days post-  
223 implantation. ADT treated mice with SPRY2 deficient orthografts showed adverse clinical  
224 signs such as weight loss around 60 days post implantation. Based on this we used a refined  
225 60 days timed protocol to carry out further detailed investigations. Since the tumour  
226 incidence was 100% without considerable variation for Mock treated mice, we used n=5 per  
227 group in all our 60 days timed experiments.

228 The VCaP HN orthografts were generated in a similar manner by injecting  $10 \times 10^6$  cells in 50  
229  $\mu$ l of serum free phenol red free glutamine containing RPMI in one of the anterior prostate  
230 lobes of CD-1 nude mice. For VCaP CRPC orthografts, following orthotopic implantation of  
231 VCaP cells, the mice were castrated at the same time of intra-prostatic injections. The  
232 orthografts were collected at clinical endpoints.

233 Experimental treatments include Tocilizumab (100  $\mu$ g in PBS given as I.P. injection 3 times a  
234 week for 3 weeks), Simvastatin (80 mg/kg/day in 30% PEG400 + 0.5% Tween80 + 5%  
235 Propylene glycol in water, gavaged daily for 1 month) and ITX5061 (25 mg/kg/day in 20%  
236 hydroxypropyl-Beta-cyclodextrin made in 20mM citric acid, gavaged once daily for 1  
237 month). Individual treatments were initiated 3 days post-ADT. The mice were euthanised 60  
238 days after drug or vehicle treatments; the prostates, epididymal adipose tissue, blood and  
239 other organs of interest including liver were collected for further analyses. The prostate  
240 orthografts were weighted and divided into two halves. One half was placed in formalin for  
241 48 hr fixation before paraffin embedding. The rest of the orthograft was snapped frozen on

242 dry ice. The snap frozen prostate orthografts were pulverised for protein, RNA and steroid  
243 extraction and homogenised using micro-homogenizer for cholesterol (free and esterified)  
244 extraction. Adipose tissue collected was weighted and snap frozen for protein extraction  
245 (approximately 30 mg of adipose tissue was pulverised and used for protein extraction).  
246 Livers were excised and one of the lobes (largest) was snap frozen and rest of the tissue was  
247 formalin fixed for 48 hr before paraffin embedding. The frozen liver was further used for  
248 cryo-sectioning followed by Oil-O staining and pulverised for RNA extraction. The blood  
249 collected was allowed to stand (clot) for 15 min and then spun down at 4°C at 3000 r.p.m. for  
250 15 min. The serum was collected and stored for further analyses of testosterone, alanine  
251 transaminase activity (ALT), triglycerides, cholesterol, IL6 and free fatty acids.

252

253 **Treatment response in prostate cancer orthografts** – The prostate orthografts were  
254 weighted and their dimensions (length & height) were measured using Vernier calliper. The  
255 tumour volume was calculated based as  $\text{volume cm}^3 = (\text{length X height X width})/2$ .

256 To assess treatment response on established orthografts, we considered two aspects: (i)  
257 Treatment induced cell death within tumour and (ii) Treatment induced decrease in tumour  
258 growth. Assessment of a number of orthografts and treatments, both macroscopically and  
259 microscopically, revealed treatment induced tumour necrosis as a consistent factor in addition  
260 to tumour weight. After comparing different types of analyses to assess treatment response on  
261 established orthografts, relative tumour necrosis was found to be a consistent measure of  
262 response to treatment. Using Leica image analyser software the total tumour area and central  
263 necrotic area was calculated. This was used to calculate the % necrosis. Since the size and  
264 growth of the tumour may also result in central tumour necrotic core, the % necrosis was

265 normalised with the weight of the tumour. Thus, the data was represented as %  
266 necrosis/tumour weight.

267

268 **Visceral Metastases** – The visceral metastases burden was assessed based on both  
269 macroscopic and histological evidence of metastasis. The metastatic sites were broadly  
270 classified as proximal and distal metastases based on the localisation of metastatic foci. The  
271 proximal sites included lumbar lymph nodes (draining lymph nodes for prostate) and  
272 epididymal adipose tissue (present at a close proximity to prostate tumours). The distal sites  
273 included area that were not in immediate proximity to prostate tumours such as diaphragm  
274 and thoracic area which included lungs and thoracic lymph nodes. The metastatic foci were  
275 confirmed based on histopathological (H&E) and evidence of AR by immunohistochemistry  
276 analyses. For contingency analyses, each animal was analysed and scored for presence of  
277 proximal or distal metastases. For cumulative visceral metastases, both proximal and distal  
278 scores were assayed together i.e. 2 sites per mouse. Therefore, for experimental groups with 5  
279 mice the contingency analyses is done based on 10 metastatic sites (2 sites x 5 mice= 10  
280 sites).

281

282 **Steroid Measurements-** Serum and intra-tumoural testosterone levels were measured using  
283 Testosterone EIA kit (Cayman Chemicals, 582701). For intra-tumoural testosterone  
284 measurement, approximately 30 mg of tumour was pulverized and the fine powder was  
285 suspended in 100 µl of PBS. The steroids were extracted from tissue homogenate or serum  
286 using five times the volume of diethyl ether twice. After thorough mixing and vortexing the  
287 upper layer was transferred to clean glass tube and allowed to dry at 30°C under gentle

288 stream of N<sub>2</sub>. These tubes were left overnight for further drying so that the residue was  
289 completely free of any organic solvent. The remainder residue was dissolved in 500 µl of  
290 EIA buffer provided in the kit. The testosterone levels were measured by as per the protocol  
291 provided in the kit.

292 For LC-MS based steroid detections, the steroid extraction was carried out as described  
293 before (Weng et al, 2010). Briefly, prostate orthografts were weighted and homogenised  
294 using Polytron model in sterile PBS at 100 mg/ml. 20 µl of homogenate was saved for protein  
295 estimation by BCA method. To the rest of the homogenate for each biological sample, a mix  
296 of internal standard was added. The internal standard was a mix of Androstenedione-<sup>13</sup>C<sub>3</sub>,  
297 Dehydroepiandrosterone-D5, Testosterone <sup>13</sup>C<sub>3</sub> and 5 alpha- Dihydrotestosterone-D3 steroids  
298 (at 100 ng each). The fortified homogenates were extracted with 8 ml of 60% hexane/40%  
299 ethyl acetate mix by shaking the tubes for 1 hour at room temperature. After centrifugation at  
300 1000 g for 10 min, the organic phase was transferred to another tube and evaporated to  
301 dryness under a steady stream of N<sub>2</sub>. The residues were dissolved in 20 µl of methanol  
302 followed by addition of 150 µl of steroid depleted charcoal stripped serum. All samples were  
303 precipitated with 300 µl of a solution of 4:1 methanol: 89 g/l ZnSO<sub>4</sub>. After thoroughly  
304 mixing to ensure complete precipitation, the samples were centrifuged at 3220 g for 10 min.  
305 To the 300 µl of resultant supernatant, 900 µl of 4% H<sub>3</sub>PO<sub>4</sub> was added and the samples were  
306 thoroughly mixed. The resultant samples were then directly applied to the solid phase  
307 extraction plate, Oasis PRiME HLB µElution plate (Waters), in 2 aliquots. All used columns  
308 in the plate were washed twice with 200 µl of 25% methanol. The samples were then eluted  
309 twice with 25 µl of 90:10 acetonitrile:methanol and diluted with 25 µl of double distilled  
310 water. 5 µl was injected into the mass spectrometer. A Q-Exactive Plus Orbitrap mass  
311 spectrometer was used together with an UltiMate 3000 HPLC system (Thermo Scientific,  
312 Waltham, MA, USA), with a HSS T3 UPLC column (50 x 2.1 mm, 1.8 µm, Waters). The

313 initial mobile phase was 70% aqueous (0.1% formic acid in water) and 30% organic (0.1%  
314 formic acid in acetonitrile) and steroids were separated over a 2.5 minute gradient, increasing  
315 the organic mobile phase content to 95%. The flow rate of 0.6 ml/min and a column  
316 temperature of 40°C were used throughout, and the total analysis time was 4.5 minutes. The  
317 steroids of interest and their labelled internal standards were detected using a targeted SIM  
318 (Selected Ion Monitoring) method, where the accurate mass of each steroid ion across its  
319 known retention time range were specifically measured. Electrospray (ESI) ionization in  
320 positive polarity was used with a mass resolution of 17,500. Data were acquired with Thermo  
321 Xcalibur software and peak areas for the steroids were determined using Thermo TraceFinder  
322 software. Overall, androstenedione and testosterone were detected consistently in all the  
323 samples. Using the same set up we could detect Dihydrotestosterone (DHT) in the standard  
324 mix but failed to detect it consistently in the orthograft samples. Our set up was unable to  
325 detect Dehydroepiandrosterone (DHEA) with confidence even in standard mix. The relative  
326 peak ratio was obtained by normalising the biological sample peak area to the peak area  
327 obtained from the corresponding fortified internal standard.

328

329 **Lipid staining-** For detecting lipid accumulation, Oil Red-O (Sigma) and BODIPY (Life  
330 Technologies) staining was used. The frozen sections of tissues were fixed with 4%  
331 paraformaldehyde (PFA) in PBS for 30 min at room temperature. For Oil Red-O staining, the  
332 stock solution of 1% dye in isopropanol was diluted with D.W. in 3:2 (dye: water) ratio and  
333 filtered. The sections were washed three times with PBS after 4% PFA fixation and stained  
334 with Oil-Red O for 5-10 min. The sections were then washed with water and counter stained  
335 with haematoxylin. For BODIPY fluorescence staining, the sections or glass bottom plates,  
336 after 4% PFA fixation, were washed with PBS followed by 10 min room temperature

337 incubation with 1.5 mg/ml glycine in PBS to quench the PFA. The sections were then stained  
338 with BODIPY (10 µg/ml in PBS) for 2 hr at room temperature. The sections were then  
339 washed with PBS and counterstained with DAPI. Confocal imaging was carried out using  
340 Nikon confocal microscope using 488 nm as the excitation wavelength and 505 nm as the  
341 emission wavelength.

342

343 **Lipoprotein uptake assay-** Lipoprotein uptake was carried up by treating the cells for 5 hr in  
344 respective culture medium containing 10 µg/ml of Dil-HDL (high density lipoprotein) or Dil-  
345 LDL (low density lipoprotein). Both Dil-LDL and Dil-HDL were obtained from Biomedical  
346 Technologies Inc. HDL and LDL uptake assays were also carried out using HDL Uptake  
347 Assay Kit (Fluorometric) (Abcam, ab204717) and LDL Uptake Assay Kit (Fluorometric)  
348 (Abcam, ab204716) kits, respectively. Briefly, the cells were seeded at sub-confluent density  
349 on glass bottom 96 well white plates. Next day, the cells were either treated with medium  
350 containing 10% FBS or 10% CSS (steroid depleted charcoal stripped serum mimicking ADT  
351 conditions). After two hours, the cells were washed with wash buffer provided in the  
352 respective kits and treated with HDL or LDL containing respective media with and without  
353 drugs (e.g. ITX5061). The cells were incubated for another 4 hours and washed with wash  
354 buffer provided in the kit. The fluorescence was measured using Safire machine as indicated  
355 in the kit. The standard curve was generated simultaneously and the amount of lipoprotein  
356 uptake was analysed from the standard curve using Graph Pad Prism software. The protein  
357 content in each well was measured using BCA protein estimation kit and amount of  
358 lipoprotein taken up by cells in each well was normalised to amount of total protein in  
359 respective wells.

360



361 **Cholesterol efflux assay-** The effects of ITX5061 on cholesterol efflux were measured in  
362 CWR22Res stable clones (as indicated) using Cholesterol Efflux Assay Kit (Cell-based)  
363 (Abcam, ab196985). Briefly, the cells were loaded with labelled cholesterol as per the  
364 protocol provided in the kit. The human serum was used as cholesterol acceptors. To assay  
365 the effects of drugs on cholesterol efflux, the cells were treated with ITX5061 after  
366 cholesterol loading along with serum for active efflux.

367

368 **Real Time PCR-** The RNA was extracted from ~70 mgs of pulverised orthografts using  
369 RNeasy mini kit (Qiagen). For cell lines, RNA was extracted from sub-confluent plates using  
370 RNeasy mini kit (Qiagen). 10 ug of RNA was used for cDNA synthesis using High capacity  
371 cDNA reverse transcription kit (Applied Biosystems). Real time PCR was carried out using  
372 TaqMan® Gene Expression Master Mix (Life Technologies) in 7500 Fast Real-Time PCR  
373 System (Applied Biosystems). The primers were designed using Universal Probe Library  
374 Assay Design Center (Roche) and the respective probes were used from the universal probe  
375 library. For all RT-PCR reactions, CACS3 was used as the house-keeping gene and the  
376 relative quantities for each assay were obtained by normalising to one biological control  
377 sample (as indicated in the figures). All results are presented as relative quantities (R.Q.) for  
378 hSPRY2 (Fwd- TTTGCACATCGCAGAAAGAA & Rev-  
379 TCAGGTCTTGG AAGTGTGGTC; hIL6 (Fwd-GATGAGTACAAAAGTCCTGATCCA &  
380 Rev-CTGCAGCCACTGG TTCTGT); hHSD3B1 (Fwd-TCTTCGGTGTC ACTCACAGAG  
381 & Rev-GGCACACT AGCTTGGACACA); hHER2 (Fwd- GGGAAACCTGGA ACTCACCT  
382 & Rev-CCCTGCACCTCCTGGATA); hPSA (Fwd-GTGCTTGTGGCCTCTCGT & Rev-  
383 CAGCAAGATCACGCTTTTGT); hSCARB1/SRB1 (Fwd-CCTGAGGACACCGTGAGC &  
384 Rev-GGTGTGCAACAGGCACAT); hLDLR (Fwd-CTACAAGTGGGTCTGCGATG &

385 Rev-TTTGCAGGTGACAGACAAGC); hCYP17A1 (Fwd-  
386 TCACCGTCAGTAAGCTATTTGC & Rev- GGGCCAGGATCTCACCTATAC);  
387 hHMGCR (Fwd- GTTCGGTGGCCTCTAGTGAG & Rev-  
388 TGCATTCGAAAAAGTCTTGACA); mHmgcr (Fwd- TGCGTAAGCGCAGTTCCT&  
389 Rev- TTGTAGCCTCACAGTCCTTGG); hAR full length (Fwd-  
390 CATGTGGAAGCTGCAAGGTCT & Rev- TCTGTTTCCCTTCAGCGGC) and hAR-V7  
391 (Fwd- AACAGAAGTACCTGTGCGCC & Rev- TCAGGGTCTGGTCATTTTGA). The AR  
392 full length and AR-V7 variant (Jones et al, 2015) were assayed using BIO-RAD SYBR®  
393 Green method.

394 **Tissue Cholesterol Quantification-** Free and esterified cholesterol quantification was  
395 carried out using Cholesterol/Cholesteryl Ester quantitation assay kit (Abcam ab65359). For  
396 the prostate orthografts, pre-weighed orthografts were thawed and homogenised using micro-  
397 homogenizer. The cholesterol was extracted in 200 µl (per 10 mg of tissue) of chloroform:  
398 isopropanol: NP-40 (7:11:0.1) by mixing thoroughly and vortexing. The organic phase was  
399 collected in a separate tube after centrifugation for 10 min at 15,000x g. The samples were air  
400 dried at 50°C to remove chloroform. The samples were further vacuum dried for 30 min to  
401 remove trace organic solvent. The residue obtained was dissolved by sonication and  
402 vortexing with 200 µl of assay buffer provided in the kit. The quantitation assay was carried  
403 out with and without cholesterol esterase to assay free and esterified cholesterol levels.

404

405 **Serum Analyses-** Murine serum IL6 was measured using Interleukin-6 Mouse ELISA Kit  
406 (Abcam, ab100712). The triglycerides from murine sera were measured using Triglyceride  
407 Quantification Kit (Abcam, ab65336). Serum free fatty acids were measured using Free Fatty  
408 Acid Quantification Kit (Abcam, ab65341). The serum cholesterol was measured using HDL

409 and LDL/VLDL Cholesterol Assay Kit (Abcam, ab65390). Cholesterol from both fractions  
410 (HDL and LDL/VLDL) was added and presented as total serum cholesterol. Liver function  
411 was measured in the form of serum alanine transaminase activity (ALT) using Alanine  
412 Transaminase Activity Assay Kit (Colorimetric) (Abcam, ab105134).

413

414

415

416 **References:**

417 Cerami E, Gao J, Dogrusoz U, Gross BE, Sumer SO, Aksoy BA, Jacobsen A, Byrne CJ,  
418 Heuer ML, Larsson E, Antipin Y, Reva B, Goldberg AP, Sander C, Schultz N (2012) The  
419 cBio cancer genomics portal: an open platform for exploring multidimensional cancer  
420 genomics data. *Cancer discovery* 2: 401-404

421

422 Gao J, Aksoy BA, Dogrusoz U, Dresdner G, Gross B, Sumer SO, Sun Y, Jacobsen A, Sinha  
423 R, Larsson E, Cerami E, Sander C, Schultz N (2013) Integrative analysis of complex cancer  
424 genomics and clinical profiles using the cBioPortal. *Science signaling* 6: pl1

425

426 Gao M, Patel R, Ahmad I, Fleming J, Edwards J, McCracken S, Sahadevan K, Seywright M,  
427 Norman J, Sansom O, Leung HY (2012) SPRY2 loss enhances ErbB trafficking and  
428 PI3K/AKT signalling to drive human and mouse prostate carcinogenesis. *EMBO molecular*  
429 *medicine* 4: 776-790

430

431 Hsieh AC, Costa M, Zollo O, Davis C, Feldman ME, Testa JR, Meyuhas O, Shokat KM,  
432 Ruggero D (2010) Genetic dissection of the oncogenic mTOR pathway reveals druggable  
433 addiction to translational control via 4EBP-eIF4E. *Cancer cell* 17: 249-261  
434  
435 Jones D, Wade M, Nakjang S, Chaytor L, Grey J, Robson CN, Gaughan L (2015) FOXA1  
436 regulates androgen receptor variant activity in models of castrate-resistant prostate cancer.  
437 *Oncotarget* 6: 29782-29794  
438  
439 Lesche R, Groszer M, Gao J, Wang Y, Messing A, Sun H, Liu X, Wu H (2002) Cre/loxP-  
440 mediated inactivation of the murine Pten tumor suppressor gene. *Genesis* 32: 148-149  
441  
442 Mootha VK, Lindgren CM, Eriksson KF, Subramanian A, Sihag S, Lehar J, Puigserver P,  
443 Carlsson E, Ridderstrale M, Laurila E, Houstis N, Daly MJ, Patterson N, Mesirov JP, Golub  
444 TR, Tamayo P, Spiegelman B, Lander ES, Hirschhorn JN, Altshuler D et al. (2003) PGC-  
445 1alpha-responsive genes involved in oxidative phosphorylation are coordinately  
446 downregulated in human diabetes. *Nature genetics* 34: 267-273  
447  
448 Nagabhushan M, Miller CM, Pretlow TP, Giaconia JM, Edgehouse NL, Schwartz S, Kung  
449 HJ, de Vere White RW, Gumerlock PH, Resnick MI, Amini SB, Pretlow TG (1996) CWR22:  
450 the first human prostate cancer xenograft with strongly androgen-dependent and relapsed  
451 strains both in vivo and in soft agar. *Cancer research* 56: 3042-3046  
452

453 Patel R, Gao M, Ahmad I, Fleming J, Singh LB, Rai TS, McKie AB, Seywright M,  
454 Barnetson RJ, Edwards J, Sansom OJ, Leung HY (2013) Sprouty2, PTEN, and PP2A interact  
455 to regulate prostate cancer progression. *The Journal of clinical investigation* 123: 1157-1175  
456

457 Shim K, Minowada G, Coling DE, Martin GR (2005) Sprouty2, a mouse deafness gene,  
458 regulates cell fate decisions in the auditory sensory epithelium by antagonizing FGF  
459 signaling. *Developmental cell* 8: 553-564  
460

461 Sramkoski RM, Pretlow TG, 2nd, Giaconia JM, Pretlow TP, Schwartz S, Sy MS, Marengo  
462 SR, Rhim JS, Zhang D, Jacobberger JW (1999) A new human prostate carcinoma cell line,  
463 22Rv1. *In vitro cellular & developmental biology Animal* 35: 403-409  
464

465 Subramanian A, Tamayo P, Mootha VK, Mukherjee S, Ebert BL, Gillette MA, Paulovich A,  
466 Pomeroy SL, Golub TR, Lander ES, Mesirov JP (2005) Gene set enrichment analysis: a  
467 knowledge-based approach for interpreting genome-wide expression profiles. *Proceedings of*  
468 *the National Academy of Sciences of the United States of America* 102: 15545-15550  
469

470 Tan SS, Ahmad I, Bennett HL, Singh L, Nixon C, Seywright M, Barnetson RJ, Edwards J,  
471 Leung HY (2011) GRP78 up-regulation is associated with androgen receptor status, Hsp70-  
472 Hsp90 client proteins and castrate-resistant prostate cancer. *The Journal of pathology* 223:  
473 81-87  
474

475 Taurino C, Miller WH, McBride MW, McClure JD, Khanin R, Moreno MU, Dymott JA,  
476 Delles C, Dominiczak AF (2010) Gene expression profiling in whole blood of patients with  
477 coronary artery disease. *Clinical science* 119: 335-343

478

479 Weng Y, Xie F, Xu L, Zagorevski D, Spink DC, Ding X (2010) Analysis of testosterone and  
480 dihydrotestosterone in mouse tissues by liquid chromatography-electrospray ionization-  
481 tandem mass spectrometry. *Analytical biochemistry* 402: 121-128

482

483

### A. Metastases in Prostate Orthograft Model

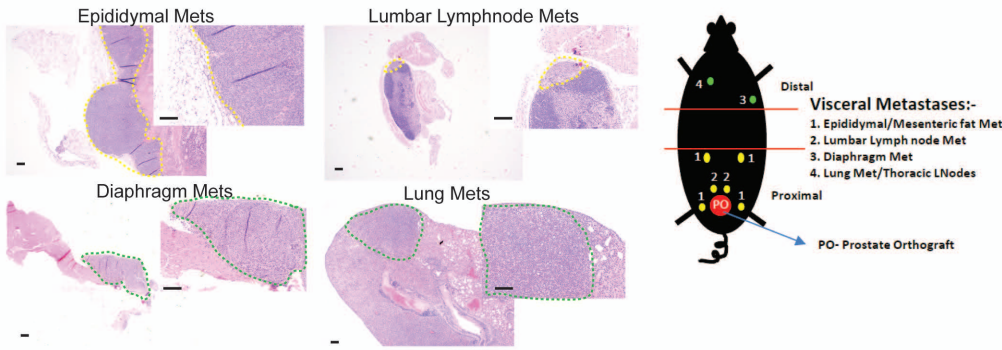

### B.

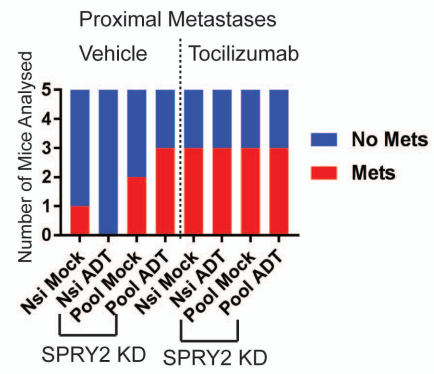

### C.

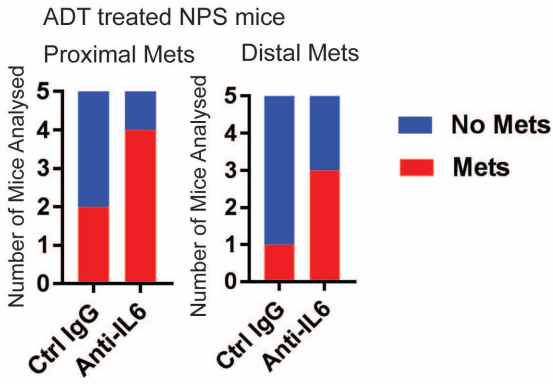

### D. ADT treated NPS mice Visceral Metastases

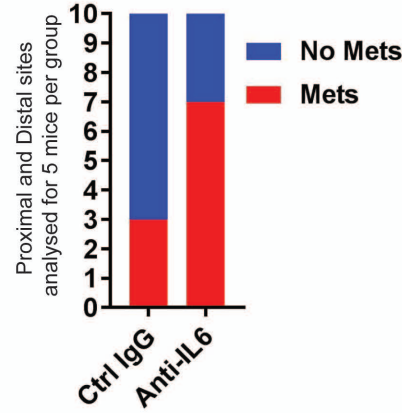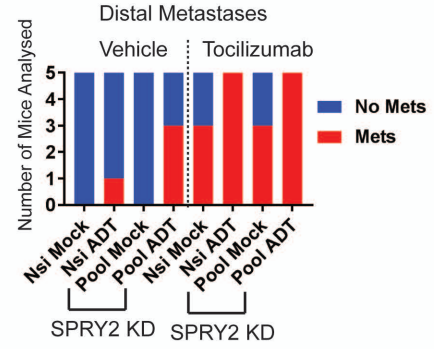

### E.

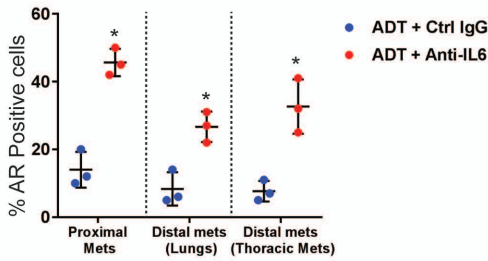

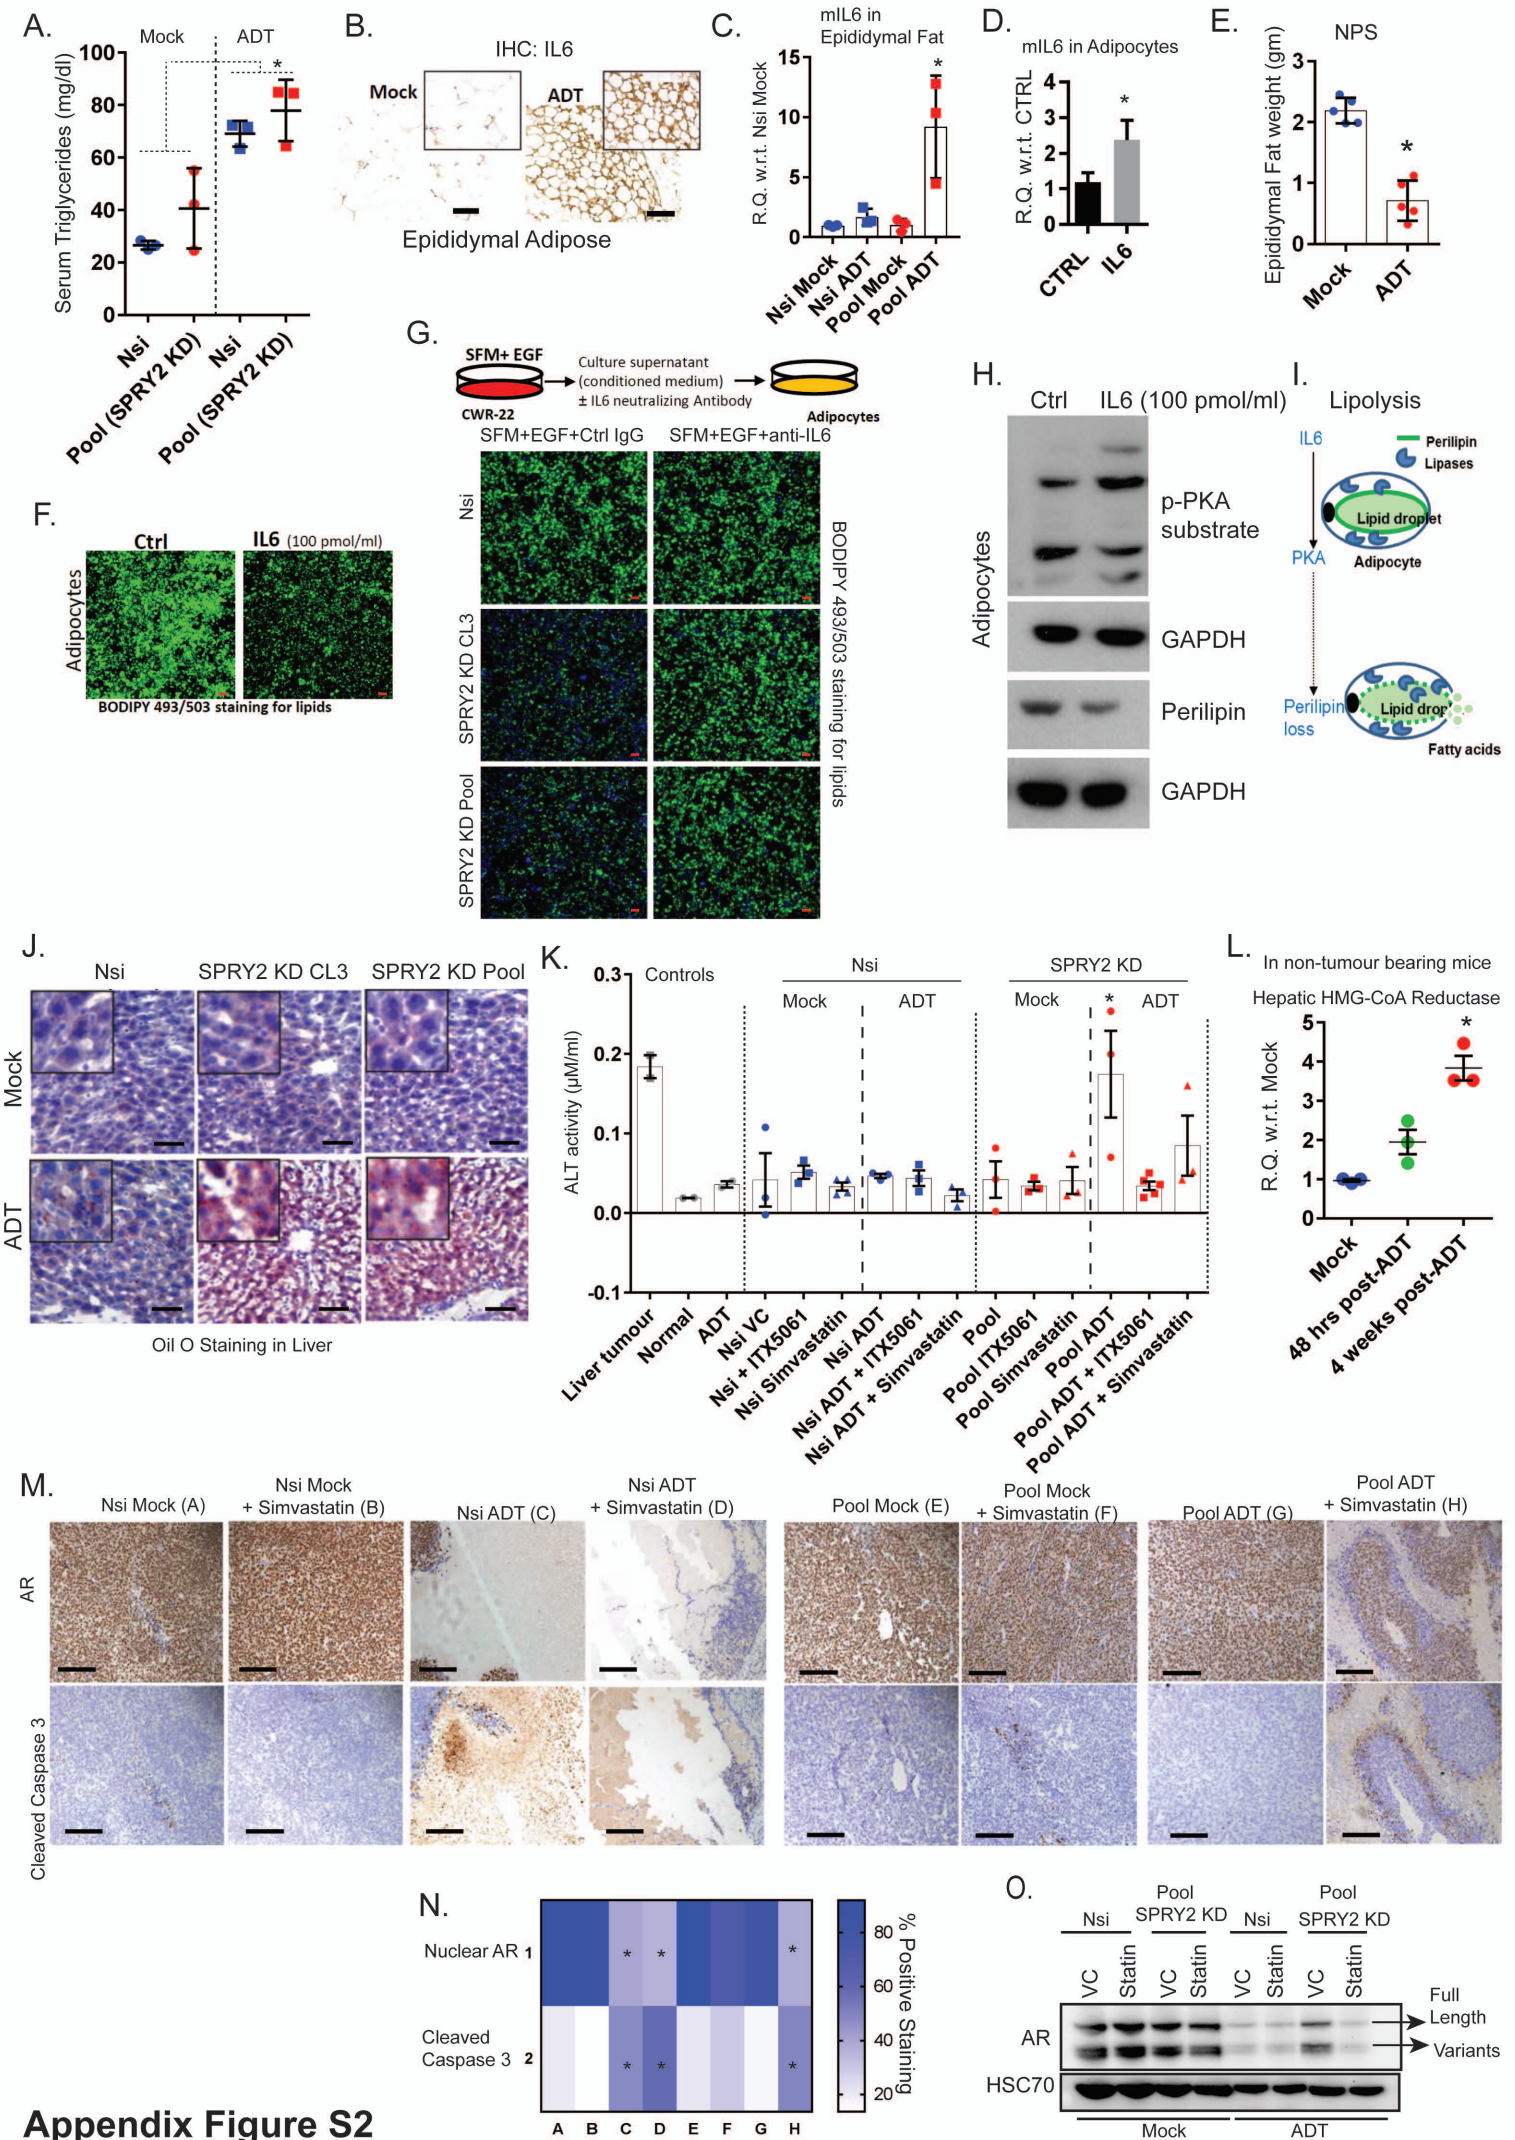

Appendix Figure S2



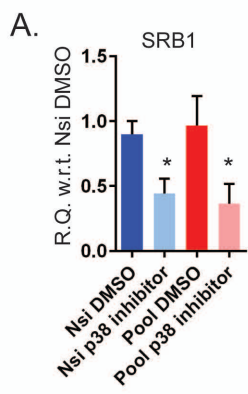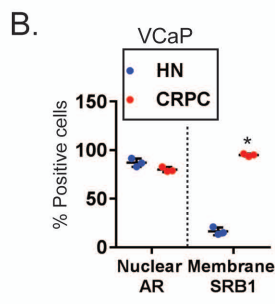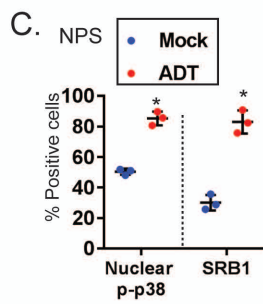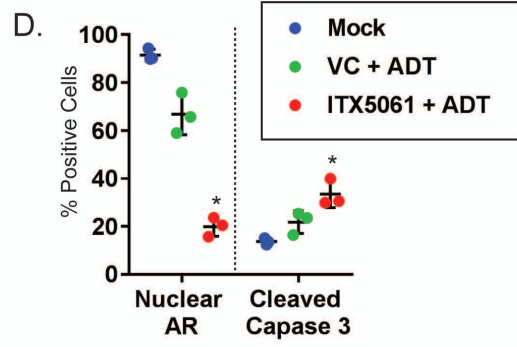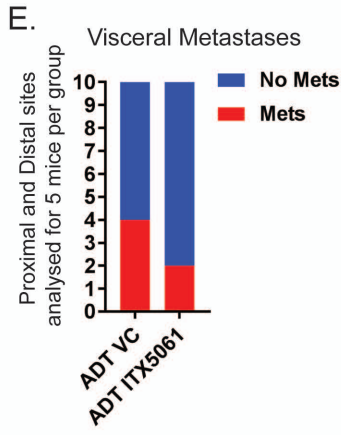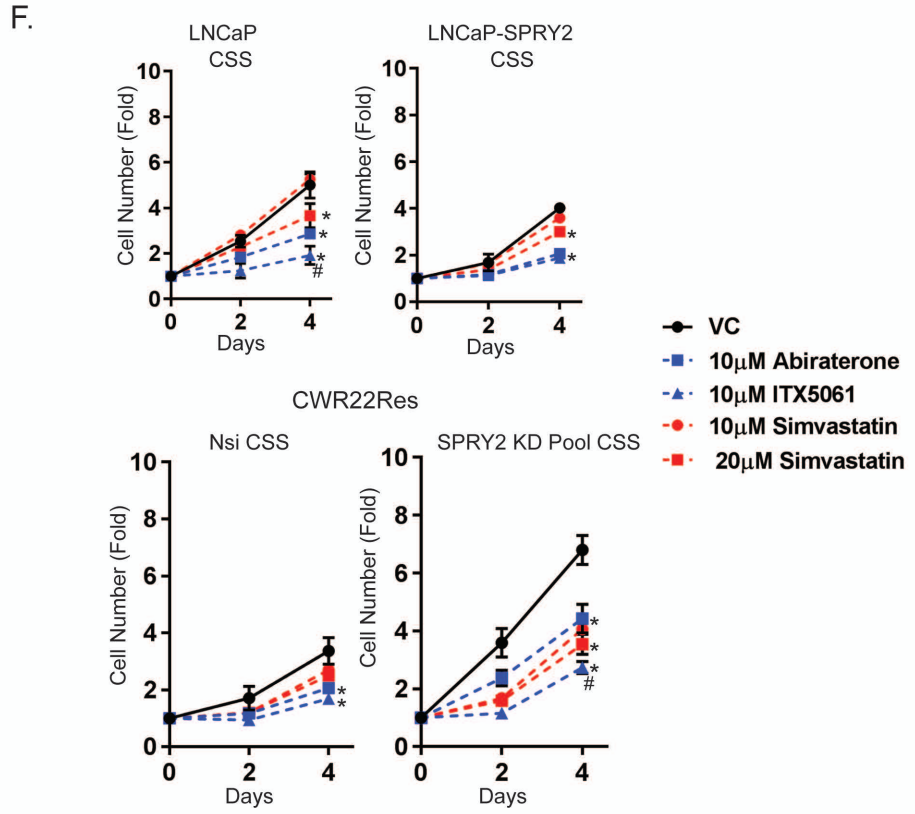

1 **Appendix Figure S1- Visceral Metastases**

2 **A** Presentation of visceral metastases observed in the prostate orthograft model. The  
3 metastatic incidence is segregated as proximal (yellow dots) or distal (green dots).  
4 Representative H&E images of the visceral metastases. Scale bar: 10 $\mu$ m.

5 **B** Proximal (upper panel) and distal (lower panel: Chi-square test  $p=0.002$ ) metastases  
6 incidence in the mice with indicated CWR22Res orthografts ( $n= 5$  mice per group).

7 **C** Incidence of proximal and distal metastases incidence in ADT treated NPS mice ( $n= 5$   
8 mice per group).

9 **D** Incidence of cumulative visceral (proximal and distal) metastases was analysed from 10  
10 sites per group (2 sites: proximal and distal x 5 mice per group) in the NPS. The proximal  
11 metastases sites analysed were lumbar lymph nodes and epididymal or mesenteric adipose  
12 tissue & the distal sites include thoracic lymph nodes and lungs. Chi-square test:  $p=0.02$ .

13 **E** IHC quantification of AR positive cells as presented in figure 3K ( $n=3$  mice analysed per  
14 group;  $*p<0.05$  compared to respective controls; unpaired two-tailed Student's t-test).

15 Data Information: In (E), each data point represents one independent observation and the data  
16 is presented as mean  $\pm$  SD. In (B-D), data are presented as contingency graph.

17

18 **Appendix Figure S2- Systemic IL6 and cholesterol homeostasis in CRPC**

19 **A** Serum triglyceride levels in mice with CWR22Res prostate orthografts as indicated ( $n=3$   
20 mice per group;  $*p<0.05$  ANOVA Tukey's test).

21 **B** Representative immunostained images ( $n=3$ ) for IL6 of epididymal adipose tissue from  
22 ADT treated NPS mice.

23 **C** Relative quantitation of murine IL6 mRNA in epididymal adipose tissues of indicated  
24 mice with CWR22Res orthografts (n=3 mice per group; \*p<0.05 ANOVA Tukey's test).

25 **D** Relative quantitation of murine IL6 mRNA in 3T3-L1 adipocytes treated for 16 hr with  
26 human 100 pmol/ml IL6 (n=3; \*p<0.05; Unpaired two-tailed Student's t-test).

27 **E** The epididymal fat weights of NPS mice (n=5 mice per group; \*p<0.05 unpaired two-  
28 tailed Student's t-test).

29 **F** Representative confocal images (n=5) of Bodipy staining in IL6 (100 pmol/ml) treated  
30 3T3-L1 adipocytes.

31 **G** Top: Schematic of experimental design for the data represented below. Briefly,  
32 conditioned medium from EGF treated CWR22Res cells in serum-free RPMI medium (SFM)  
33 with or without anti-IL6 neutralising antibody is added to 3T3-L1 adipocytes pre-stained with  
34 Bodipy to test the effects of IL6 on adipocyte lipolysis.

35 Bottom: Representative confocal images (n=3) of Bodipy (for lipids) and DAPI (for nuclei to  
36 account for the presence of cells) staining in 3T3-L1 adipocytes treated for 24 hr with filtered  
37 cultured supernatant from Nsi and SPRY2 KD (CL3 and Pool) CWR22Res cells grown in  
38 SFM containing EGF (20 ng/ml) for 24 hr with Ctrl or anti-IL6 neutralising antibody (0.1  
39  $\mu\text{g}/\mu\text{l}$ ).

40 **H** Representative images (n=3) of immunoblots for indicated proteins in whole cell lysates  
41 of 3T3-L1 adipocytes treated with IL6 (100 pmol/ml). GAPDH is used as loading control.

42 **I** Schematic representation of lipolytic effects of IL6 on adipocytes: IL6 via PKA activation  
43 induces loss of perilipin. Normally perilipin forms a protective layer around lipid droplets and  
44 protects triglycerides and cholesterol esters within the lipid droplet from cytosolic lipases.  
45 Upon perilipin loss, lipases can induce lipolysis within the cells.

46 **J** Representative images of Oil O stained liver sections from mice with CWR22Res prostate  
47 orthografts.

48 **K** Serum alanine transaminase activity (ALT) in mice bearing CWR22Res orthografts  
49 treated as indicated (n=3 mice per group). Sera from mice bearing liver tumours (age  
50 associated tumours in wildtype colony mice) were used as a positive control (n=2 mice). Sera  
51 from mock or ADT treated non-tumour bearing CD-1 nude mice (age matched) were used as  
52 additional controls (n=2 mice). \*p<0.05; ANOVA Tukey's test.

53 **L** Relative quantitation of murine Hmgcr mRNA in murine livers from non-tumour bearing  
54 mice treated as indicated (n=3 mice per group; \*p<0.05 ANOVA with Tukey's test).

55 **M** Representative images (n=3) of CWR22Res prostate orthograft sections immunostained  
56 for AR and cleaved caspase 3 from Mock or ADT treated mice. Scale bar=10  $\mu$ m.

57 **N** Heat map showing mean value of IHC quantifications in appendix figure S2M (n=3 mice  
58 per group; \*p<0.05 ANOVA Tukey's test).

59 **O** Representative immunoblot images for indicated proteins in lysates from indicated  
60 CWR22Res orthografts. HSC70 is used as loading control.

61 Data Information: In (A, C, E, K, L), each data point represents one independent observation.  
62 In (A, C, D, E, K), the data is presented as mean  $\pm$  SD. In (N), data are presented as heat map  
63 based on the mean of three independent observations.

64

65

66

67

68 **Appendix Figure S3- Targeting SRB1 in CRPC**

69 **A** Relative quantitation of SRB1 mRNA in Nsi and SPRY2 (Pool) CWR22Res cells treated  
70 for 16 hr with p38 inhibitor SB203580 (20  $\mu$ M) (n=3; \*p<0.05 compared to respective  
71 DMSO controls; unpaired two-tailed Student's t-test).

72 **B-C** IHC quantifications of indicated proteins shown in **(B)** figure 5G and **(C)** figure 5H  
73 (n=3 mice per group; \*p<0.05 compared to respective HN samples; unpaired two-tailed  
74 Student's t-test).

75 **D** IHC quantifications of indicated proteins shown in figure 6G (n=3 mice per group;  
76 \*p<0.05 ANOVA Tukey's test).

77 **E** Incidence of cumulative visceral (proximal and distal as shown in Appendix S1A)  
78 metastases are analysed from 10 sites per group (2 sites x 5 mice per group) in the NPS mice.

79 **F** Growth rate of indicated prostate cancer cells relative to Day 0 (T0) in medium  
80 containing 10% CSS (hormone deprived conditions) (n=3; \*p<0.05 compared to respective  
81 DMSO/VC; #p<0.05 compared to all treatments; ANOVA Tukey's test).

82 Data Information: In (B-D), each data point represents one independent observation. In (F),  
83 each data point is presented as mean of three independent observations and data presented as  
84 mean  $\pm$  SD. In (A), the data is presented as mean  $\pm$  SD. In (E), data are presented  
85 contingency graph.

86

87 **Appendix Table S1-** STR analyses of CWR22Res and CWR22RV1 cells.

88 **Appendix Table S2-** Detailed statistical analyses and p values for groups compared.

89

**Appendix Table S1**

| Cell lines | Markers | Allele 1 | Allele 2 | Allele 3 |
|------------|---------|----------|----------|----------|
| CWR22Res   | AMEL    | X        | Y        |          |
|            | CSF1PO  | 10       | 11       |          |
|            | D13S317 | 9        | 12       |          |
|            | D16S539 | 12       |          |          |
|            | D21S11  | 30       |          |          |
|            | D5S818  | 11       | 12       | 13       |
|            | D7S820  | 9        | 10       |          |
|            | TH01    | 6        | 9.3      |          |
|            | TPOX    | 8        |          |          |
|            | vWA     | 15       | 21       |          |
| CWR22RV1   | AMEL    | X        | Y        |          |
|            | CSF1PO  | 10       | 11       |          |
|            | D13S317 | 9        | 12       |          |
|            | D16S539 | 12       |          |          |
|            | D21S11  | 30       |          |          |
|            | D5S818  | 11       | 12       |          |
|            | D7S820  | 10       | 11       |          |
|            | TH01    | 6        | 9.3      |          |
|            | TPOX    | 8        |          |          |
|            | vWA     | 15       | 21       |          |

**Results**

CWR22Res and CWR22RV1 Matched >95% with 22Rv1 (prostate epithelial)

**Appendix Table S2**

| <b>Figure number</b> | <b>Statistical test used</b> | <b>Experimental groups compared</b>     | <b>P Value</b> |
|----------------------|------------------------------|-----------------------------------------|----------------|
| Figure 1H            | ANOVA Tukey's Test           | Time 0                                  |                |
|                      |                              | CTRL FBS vs. SPRY2 FBS                  | >0.9999        |
|                      |                              | CTRL FBS vs. CTRL CSS                   | >0.9999        |
|                      |                              | CTRL FBS vs. SPRY2 CSS                  | >0.9999        |
|                      |                              | SPRY2 FBS vs. CTRL CSS                  | >0.9999        |
|                      |                              | SPRY2 FBS vs. SPRY2 CSS                 | >0.9999        |
|                      |                              | CTRL CSS vs. SPRY2 CSS                  | >0.9999        |
|                      |                              | Time 2 days                             |                |
|                      |                              | CTRL FBS vs. SPRY2 FBS                  | 0.0401         |
|                      |                              | CTRL FBS vs. CTRL CSS                   | 0.0061         |
|                      |                              | CTRL FBS vs. SPRY2 CSS                  | <0.0001        |
|                      |                              | SPRY2 FBS vs. CTRL CSS                  | 0.8457         |
|                      |                              | SPRY2 FBS vs. SPRY2 CSS                 | <0.0001        |
|                      |                              | CTRL CSS vs. SPRY2 CSS                  | 0.0002         |
|                      |                              | Time 4 days                             |                |
|                      |                              | CTRL FBS vs. SPRY2 FBS                  | 0.0001         |
|                      |                              | CTRL FBS vs. CTRL CSS                   | <0.0001        |
|                      |                              | CTRL FBS vs. SPRY2 CSS                  | <0.0001        |
|                      |                              | SPRY2 FBS vs. CTRL CSS                  | 0.0004         |
|                      |                              | SPRY2 FBS vs. SPRY2 CSS                 | <0.0001        |
|                      |                              | CTRL CSS vs. SPRY2 CSS                  | <0.0001        |
| Figure 1I            | ANOVA Tukey's Test           | Time 0                                  |                |
|                      |                              | Nsi FBS vs. SPRY2 KD CL3 FBS            | >0.9999        |
|                      |                              | Nsi FBS vs. SPRY2 KD Pool FBS           | >0.9999        |
|                      |                              | Nsi FBS vs. Nsi CSS                     | >0.9999        |
|                      |                              | Nsi FBS vs. SPRY2 KD CL3 CSS            | >0.9999        |
|                      |                              | Nsi FBS vs. SPRY2 KD Pool CSS           | >0.9999        |
|                      |                              | SPRY2 KD CL3 FBS vs. SPRY2 KD Pool FBS  | >0.9999        |
|                      |                              | SPRY2 KD CL3 FBS vs. Nsi CSS            | >0.9999        |
|                      |                              | SPRY2 KD CL3 FBS vs. SPRY2 KD CL3 CSS   | >0.9999        |
|                      |                              | SPRY2 KD CL3 FBS vs. SPRY2 KD Pool CSS  | >0.9999        |
|                      |                              | SPRY2 KD Pool FBS vs. Nsi CSS           | >0.9999        |
|                      |                              | SPRY2 KD Pool FBS vs. SPRY2 KD CL3 CSS  | >0.9999        |
|                      |                              | SPRY2 KD Pool FBS vs. SPRY2 KD Pool CSS | >0.9999        |
|                      |                              | Nsi CSS vs. SPRY2 KD CL3 CSS            | >0.9999        |
|                      |                              | Nsi CSS vs. SPRY2 KD Pool CSS           | >0.9999        |

SPRY2 KD CL3 CSS vs. SPRY2 KD Pool CSS >0.9999

Time 2 days

Nsi FBS vs. SPRY2 KD CL3 FBS 0.9614  
 Nsi FBS vs. SPRY2 KD Pool FBS 0.9961  
 Nsi FBS vs. Nsi CSS 0.0028  
 Nsi FBS vs. SPRY2 KD CL3 CSS 0.9951  
 Nsi FBS vs. SPRY2 KD Pool CSS >0.9999  
 SPRY2 KD CL3 FBS vs. SPRY2 KD Pool FBS 0.9994  
 SPRY2 KD CL3 FBS vs. Nsi CSS 0.0003  
 SPRY2 KD CL3 FBS vs. SPRY2 KD CL3 CSS 0.9996  
 SPRY2 KD CL3 FBS vs. SPRY2 KD Pool CSS 0.9675  
 SPRY2 KD Pool FBS vs. Nsi CSS 0.0007  
 SPRY2 KD Pool FBS vs. SPRY2 KD CL3 CSS >0.9999  
 SPRY2 KD Pool FBS vs. SPRY2 KD Pool CSS 0.9972  
 Nsi CSS vs. SPRY2 KD CL3 CSS 0.0006  
 Nsi CSS vs. SPRY2 KD Pool CSS 0.0026  
 SPRY2 KD CL3 CSS vs. SPRY2 KD Pool CSS 0.9964

Time 4 days

Nsi FBS vs. SPRY2 KD CL3 FBS 0.4478  
 Nsi FBS vs. SPRY2 KD Pool FBS 0.7515  
 Nsi FBS vs. Nsi CSS <0.0001  
 Nsi FBS vs. SPRY2 KD CL3 CSS 0.8635  
 Nsi FBS vs. SPRY2 KD Pool CSS 0.2292  
 SPRY2 KD CL3 FBS vs. SPRY2 KD Pool FBS 0.0309  
 SPRY2 KD CL3 FBS vs. Nsi CSS <0.0001  
 SPRY2 KD CL3 FBS vs. SPRY2 KD CL3 CSS 0.0528  
 SPRY2 KD CL3 FBS vs. SPRY2 KD Pool CSS 0.0026  
 SPRY2 KD Pool FBS vs. Nsi CSS <0.0001  
 SPRY2 KD Pool FBS vs. SPRY2 KD CL3 CSS >0.9999  
 SPRY2 KD Pool FBS vs. SPRY2 KD Pool CSS 0.9385  
 Nsi CSS vs. SPRY2 KD CL3 CSS <0.0001  
 Nsi CSS vs. SPRY2 KD Pool CSS <0.0001  
 SPRY2 KD CL3 CSS vs. SPRY2 KD Pool CSS 0.8599

**Figure number**

**Statistical test used**

**Experimental groups compared**

**P Value**

Figure 1J

ANOVA Tukey's Test

Nsi Mock vs. CL3 Mock

>0.9999

Nsi Mock vs. Pool Mock

0.9796

Nsi Mock vs. Nsi ADT

0.0014

Nsi Mock vs. CL3 ADT

0.9988



|                        |         |
|------------------------|---------|
| Nsi Mock vs. Pool ADT  | 0.9999  |
| CL3 Mock vs. Pool Mock | 0.9502  |
| CL3 Mock vs. Nsi ADT   | 0.0021  |
| CL3 Mock vs. CL3 ADT   | >0.9999 |
| CL3 Mock vs. Pool ADT  | >0.9999 |
| Pool Mock vs. Nsi ADT  | 0.0002  |
| Pool Mock vs. CL3 ADT  | 0.8811  |
| Pool Mock vs. Pool ADT | 0.9283  |
| Nsi ADT vs. CL3 ADT    | 0.0036  |
| Nsi ADT vs. Pool ADT   | 0.0026  |
| CL3 ADT vs. Pool ADT   | >0.9999 |

|           |                    |                        |         |
|-----------|--------------------|------------------------|---------|
| Figure 1K | ANOVA Tukey's Test | Nsi Mock vs. CL3 Mock  | 0.2544  |
|           |                    | Nsi Mock vs. Pool Mock | 0.7985  |
|           |                    | Nsi Mock vs. Nsi ADT   | <0.0001 |
|           |                    | Nsi Mock vs. CL3 ADT   | 0.9547  |
|           |                    | Nsi Mock vs. Pool ADT  | 0.9272  |
|           |                    | CL3 Mock vs. Pool Mock | 0.9207  |
|           |                    | CL3 Mock vs. Nsi ADT   | <0.0001 |
|           |                    | CL3 Mock vs. CL3 ADT   | 0.7286  |
|           |                    | CL3 Mock vs. Pool ADT  | 0.7873  |
|           |                    | Pool Mock vs. Nsi ADT  | <0.0001 |
|           |                    | Pool Mock vs. CL3 ADT  | 0.9981  |
|           |                    | Pool Mock vs. Pool ADT | 0.9995  |
|           |                    | Nsi ADT vs. CL3 ADT    | <0.0001 |
|           |                    | Nsi ADT vs. Pool ADT   | <0.0001 |
|           |                    | CL3 ADT vs. Pool ADT   | >0.9999 |

|           |                    |                        |         |
|-----------|--------------------|------------------------|---------|
| Figure 2B | ANOVA Tukey's Test | Nsi Mock vs. CL3 Mock  | <0.0001 |
|           |                    | Nsi Mock vs. Pool Mock | 0.0026  |
|           |                    | Nsi Mock vs. Nsi ADT   | 0.0007  |
|           |                    | Nsi Mock vs. CL3 ADT   | <0.0001 |
|           |                    | Nsi Mock vs. Pool ADT  | 0.0031  |
|           |                    | CL3 Mock vs. Pool Mock | 0.0495  |
|           |                    | CL3 Mock vs. Nsi ADT   | <0.0001 |
|           |                    | CL3 Mock vs. CL3 ADT   | 0.9342  |
|           |                    | CL3 Mock vs. Pool ADT  | 0.0423  |
|           |                    | Pool Mock vs. Nsi ADT  | <0.0001 |
|           |                    | Pool Mock vs. CL3 ADT  | 0.0058  |
|           |                    | Pool Mock vs. Pool ADT | >0.9999 |
|           |                    | Nsi ADT vs. CL3 ADT    | <0.0001 |
|           |                    | Nsi ADT vs. Pool ADT   | <0.0001 |
|           |                    | CL3 ADT vs. Pool ADT   | 0.0049  |

|                      |                    |                        |         |
|----------------------|--------------------|------------------------|---------|
| Figure 2E            | ANOVA Tukey's Test | Nsi Mock vs. CL3 Mock  | 0.866   |
|                      |                    | Nsi Mock vs. Pool Mock | 0.9821  |
|                      |                    | Nsi Mock vs. Nsi ADT   | <0.0001 |
|                      |                    | Nsi Mock vs. CL3 ADT   | <0.0001 |
|                      |                    | Nsi Mock vs. Pool ADT  | <0.0001 |
|                      |                    | CL3 Mock vs. Pool Mock | 0.9976  |
|                      |                    | CL3 Mock vs. Nsi ADT   | <0.0001 |
|                      |                    | CL3 Mock vs. CL3 ADT   | <0.0001 |
|                      |                    | CL3 Mock vs. Pool ADT  | <0.0001 |
|                      |                    | Pool Mock vs. Nsi ADT  | <0.0001 |
|                      |                    | Pool Mock vs. CL3 ADT  | <0.0001 |
|                      |                    | Pool Mock vs. Pool ADT | <0.0001 |
|                      |                    | Nsi ADT vs. CL3 ADT    | >0.9999 |
|                      |                    | Nsi ADT vs. Pool ADT   | 0.9904  |
| CL3 ADT vs. Pool ADT | 0.9956             |                        |         |

|                      |                    |                        |         |
|----------------------|--------------------|------------------------|---------|
| Figure 2F            | ANOVA Tukey's Test | Nsi Mock vs. CL3 Mock  | >0.9999 |
|                      |                    | Nsi Mock vs. Pool Mock | 0.5422  |
|                      |                    | Nsi Mock vs. Nsi ADT   | <0.0001 |
|                      |                    | Nsi Mock vs. CL3 ADT   | 0.0431  |
|                      |                    | Nsi Mock vs. Pool ADT  | 0.9653  |
|                      |                    | CL3 Mock vs. Pool Mock | 0.6794  |
|                      |                    | CL3 Mock vs. Nsi ADT   | <0.0001 |
|                      |                    | CL3 Mock vs. CL3 ADT   | 0.0695  |
|                      |                    | CL3 Mock vs. Pool ADT  | 0.9919  |
|                      |                    | Pool Mock vs. Nsi ADT  | <0.0001 |
|                      |                    | Pool Mock vs. CL3 ADT  | 0.6938  |
|                      |                    | Pool Mock vs. Pool ADT | 0.9408  |
|                      |                    | Nsi ADT vs. CL3 ADT    | 0.0008  |
|                      |                    | Nsi ADT vs. Pool ADT   | <0.0001 |
| CL3 ADT vs. Pool ADT | 0.2087             |                        |         |

|           |                    |                        |         |
|-----------|--------------------|------------------------|---------|
| Figure 2G | ANOVA Tukey's Test | Nsi Mock vs. CL3 Mock  | 0.4299  |
|           |                    | Nsi Mock vs. Pool Mock | 0.9966  |
|           |                    | Nsi Mock vs. Nsi ADT   | >0.9999 |
|           |                    | Nsi Mock vs. CL3 ADT   | <0.0001 |
|           |                    | Nsi Mock vs. Pool ADT  | 0.0003  |
|           |                    | CL3 Mock vs. Pool Mock | 0.6902  |

|                        |         |
|------------------------|---------|
| CL3 Mock vs. Nsi ADT   | 0.357   |
| CL3 Mock vs. CL3 ADT   | 0.0004  |
| CL3 Mock vs. Pool ADT  | 0.0064  |
| Pool Mock vs. Nsi ADT  | 0.9877  |
| Pool Mock vs. CL3 ADT  | <0.0001 |
| Pool Mock vs. Pool ADT | 0.0006  |
| Nsi ADT vs. CL3 ADT    | <0.0001 |
| Nsi ADT vs. Pool ADT   | 0.0003  |
| CL3 ADT vs. Pool ADT   | 0.4699  |

Figure 2H ANOVA Tukey's Test

|                        |         |
|------------------------|---------|
| Nsi Mock vs. CL3 Mock  | 0.9989  |
| Nsi Mock vs. Pool Mock | 0.264   |
| Nsi Mock vs. Nsi ADT   | >0.9999 |
| Nsi Mock vs. CL3 ADT   | <0.0001 |
| Nsi Mock vs. Pool ADT  | <0.0001 |
| CL3 Mock vs. Pool Mock | 0.4558  |
| CL3 Mock vs. Nsi ADT   | >0.9999 |
| CL3 Mock vs. CL3 ADT   | <0.0001 |
| CL3 Mock vs. Pool ADT  | <0.0001 |
| Pool Mock vs. Nsi ADT  | 0.3345  |
| Pool Mock vs. CL3 ADT  | <0.0001 |
| Pool Mock vs. Pool ADT | <0.0001 |
| Nsi ADT vs. CL3 ADT    | <0.0001 |
| Nsi ADT vs. Pool ADT   | <0.0001 |
| CL3 ADT vs. Pool ADT   | 0.9914  |

Figure 2J ANOVA Tukey's Test

|                                                        |         |
|--------------------------------------------------------|---------|
| Nsi                                                    |         |
| Time 0                                                 |         |
| CTRL VC vs. CTRL 10µM Abiraterone                      | >0.9999 |
| CTRL VC vs. HSD3B1 KO VC                               | >0.9999 |
| CTRL VC vs. HSD3B1 KO 10 µM Abiraterone                | >0.9999 |
| CTRL 10 µM Abiraterone vs. HSD3B1 KO VC                | >0.9999 |
| CTRL 10 µM Abiraterone vs. HSD3B1 KO 10 µM Abiraterone | >0.9999 |
| HSD3B1 KO VC vs. HSD3B1 KO 10 µM Abiraterone           | >0.9999 |
| Time 2 days                                            |         |
| CTRL VC vs. CTRL 10 µM Abiraterone                     | 0.066   |
| CTRL VC vs. HSD3B1 KO VC                               | 0.1582  |
| CTRL VC vs. HSD3B1 KO 10 µM Abiraterone                | 0.0865  |
| CTRL 10 µM Abiraterone vs. HSD3B1 KO VC                | 0.9692  |
| CTRL 10 µM Abiraterone vs. HSD3B1 KO 10 µM Abiraterone | 0.9991  |

HSD3B1 KO VC vs. HSD3B1 KO 10  $\mu$ M Abiraterone 0.9888

Time 4 days

CTRL VC vs. CTRL 10  $\mu$ M Abiraterone <0.0001  
 CTRL VC vs. HSD3B1 KO VC 0.0001  
 CTRL VC vs. HSD3B1 KO 10  $\mu$ M Abiraterone <0.0001  
 CTRL 10  $\mu$ M Abiraterone vs. HSD3B1 KO VC 0.5738  
 CTRL 10  $\mu$ M Abiraterone vs. HSD3B1 KO 10  $\mu$ M Abiraterone 0.5335  
 HSD3B1 KO VC vs. HSD3B1 KO 10  $\mu$ M Abiraterone 0.0616

SPRY2 KD Pool

Time 0

CTRL VC vs. CTRL 10  $\mu$ M Abiraterone >0.9999  
 CTRL VC vs. HSD3B1 KO VC >0.9999  
 CTRL VC vs. HSD3B1 KO 10  $\mu$ M Abiraterone >0.9999  
 CTRL 10  $\mu$ M Abiraterone vs. HSD3B1 KO VC >0.9999  
 CTRL 10  $\mu$ M Abiraterone vs. HSD3B1 KO 10  $\mu$ M Abiraterone >0.9999  
 HSD3B1 KO VC vs. HSD3B1 KO 10  $\mu$ M Abiraterone >0.9999

Time 2 days

CTRL VC vs. CTRL 10  $\mu$ M Abiraterone 0.0052  
 CTRL VC vs. HSD3B1 KO VC 0.0011  
 CTRL VC vs. HSD3B1 KO 10  $\mu$ M Abiraterone <0.0001  
 CTRL 10  $\mu$ M Abiraterone vs. HSD3B1 KO VC 0.9233  
 CTRL 10  $\mu$ M Abiraterone vs. HSD3B1 KO 10  $\mu$ M Abiraterone 0.2245  
 HSD3B1 KO VC vs. HSD3B1 KO 10  $\mu$ M Abiraterone 0.54

Time 4 days

CTRL VC vs. CTRL 10mM Abiraterone <0.0001  
 CTRL VC vs. HSD3B1 KO VC <0.0001  
 CTRL VC vs. HSD3B1 KO 10  $\mu$ M Abiraterone <0.0001  
 CTRL 10  $\mu$ M Abiraterone vs. HSD3B1 KO VC 0.54  
 CTRL 10  $\mu$ M Abiraterone vs. HSD3B1 KO 10  $\mu$ M Abiraterone <0.0001  
 HSD3B1 KO VC vs. HSD3B1 KO 10  $\mu$ M Abiraterone 0.0002

Figure 2K Paired t test CRPC Vs HN <0.0001

Figure 2L Unpaired t test Two-tailed Nsi shHER2 vs Nsi shSc 0.0076

|           |                            |                                        |         |
|-----------|----------------------------|----------------------------------------|---------|
|           | Unpaired t test Two-tailed | Pool shHER2 vs Pool shSc               | 0.0089  |
| Figure 2M | ANOVA Tukey's Test         | Nsi Mock shScram vs. Nsi ADT shScram   | <0.0001 |
|           |                            | Nsi Mock shScram vs. Pool Mock shScram | 0.4378  |
|           |                            | Nsi Mock shScram vs. Pool ADT shScram  | 0.9433  |
|           |                            | Nsi Mock shScram vs. Nsi Mock shHER2   | 0.5236  |
|           |                            | Nsi Mock shScram vs. Nsi ADT shHER2    | <0.0001 |
|           |                            | Nsi Mock shScram vs. Pool Mock shHER2  | 0.5647  |
|           |                            | Nsi Mock shScram vs. Pool ADT shHER2   | 0.0001  |
|           |                            | Nsi ADT shScram vs. Pool Mock shScram  | <0.0001 |
|           |                            | Nsi ADT shScram vs. Pool ADT shScram   | <0.0001 |
|           |                            | Nsi ADT shScram vs. Nsi Mock shHER2    | <0.0001 |
|           |                            | Nsi ADT shScram vs. Nsi ADT shHER2     | 0.9999  |
|           |                            | Nsi ADT shScram vs. Pool Mock shHER2   | <0.0001 |
|           |                            | Nsi ADT shScram vs. Pool ADT shHER2    | 0.5303  |
|           |                            | Pool Mock shScram vs. Pool ADT shScram | 0.9769  |
|           |                            | Pool Mock shScram vs. Nsi Mock shHER2  | >0.9999 |
|           |                            | Pool Mock shScram vs. Nsi ADT shHER2   | <0.0001 |
|           |                            | Pool Mock shScram vs. Pool Mock shHER2 | >0.9999 |
|           |                            | Pool Mock shScram vs. Pool ADT shHER2  | <0.0001 |
|           |                            | Pool ADT shScram vs. Nsi Mock shHER2   | 0.9905  |
|           |                            | Pool ADT shScram vs. Nsi ADT shHER2    | <0.0001 |
|           |                            | Pool ADT shScram vs. Pool Mock shHER2  | 0.9942  |
|           |                            | Pool ADT shScram vs. Pool ADT shHER2   | <0.0001 |
|           |                            | Nsi Mock shHER2 vs. Nsi ADT shHER2     | <0.0001 |
|           |                            | Nsi Mock shHER2 vs. Pool Mock shHER2   | >0.9999 |
|           |                            | Nsi Mock shHER2 vs. Pool ADT shHER2    | <0.0001 |
|           |                            | Nsi ADT shHER2 vs. Pool Mock shHER2    | <0.0001 |
|           |                            | Nsi ADT shHER2 vs. Pool ADT shHER2     | 0.2869  |
|           |                            | Pool Mock shHER2 vs. Pool ADT shHER2   | <0.0001 |
| Figure 3A | ANOVA Tukey's Test         | Nsi Mock vs. CL3 Mock                  | 0.5034  |
|           |                            | Nsi Mock vs. Pool Mock                 | 0.0457  |
|           |                            | Nsi Mock vs. Nsi ADT                   | >0.9999 |
|           |                            | Nsi Mock vs. CL3 ADT                   | 0.0016  |
|           |                            | Nsi Mock vs. Pool ADT                  | <0.0001 |
|           |                            | CL3 Mock vs. Pool Mock                 | 0.7465  |
|           |                            | CL3 Mock vs. Nsi ADT                   | 0.6387  |
|           |                            | CL3 Mock vs. CL3 ADT                   | 0.0966  |
|           |                            | CL3 Mock vs. Pool ADT                  | <0.0001 |
|           |                            | Pool Mock vs. Nsi ADT                  | 0.073   |
|           |                            | Pool Mock vs. CL3 ADT                  | 0.7209  |
|           |                            | Pool Mock vs. Pool ADT                 | 0.0029  |
|           |                            | Nsi ADT vs. CL3 ADT                    | 0.0028  |

|           |                            |                                            |         |
|-----------|----------------------------|--------------------------------------------|---------|
|           |                            | Nsi ADT vs. Pool ADT                       | <0.0001 |
|           |                            | CL3 ADT vs. Pool ADT                       | 0.0743  |
| Figure 3B | ANOVA Tukey's Test         | Nsi Mock shScram vs. Nsi ADT shScram       | >0.9999 |
|           |                            | Nsi Mock shScram vs. Pool Mock shScram     | 0.0013  |
|           |                            | Nsi Mock shScram vs. Pool ADT shScram      | <0.0001 |
|           |                            | Nsi Mock shScram vs. Nsi Mock shHER2       | >0.9999 |
|           |                            | Nsi Mock shScram vs. Nsi ADT shHER2        | >0.9999 |
|           |                            | Nsi Mock shScram vs. Pool Mock shHER2      | >0.9999 |
|           |                            | Nsi Mock shScram vs. Pool ADT shHER2       | 0.9972  |
|           |                            | Nsi ADT shScram vs. Pool Mock shScram      | 0.0025  |
|           |                            | Nsi ADT shScram vs. Pool ADT shScram       | <0.0001 |
|           |                            | Nsi ADT shScram vs. Nsi Mock shHER2        | 0.9993  |
|           |                            | Nsi ADT shScram vs. Nsi ADT shHER2         | >0.9999 |
|           |                            | Nsi ADT shScram vs. Pool Mock shHER2       | >0.9999 |
|           |                            | Nsi ADT shScram vs. Pool ADT shHER2        | >0.9999 |
|           |                            | Pool Mock shScram vs. Pool ADT shScram     | <0.0001 |
|           |                            | Pool Mock shScram vs. Nsi Mock shHER2      | 0.0009  |
|           |                            | Pool Mock shScram vs. Nsi ADT shHER2       | 0.0023  |
|           |                            | Pool Mock shScram vs. Pool Mock shHER2     | 0.0018  |
|           |                            | Pool Mock shScram vs. Pool ADT shHER2      | 0.0045  |
|           |                            | Pool ADT shScram vs. Nsi Mock shHER2       | <0.0001 |
|           |                            | Pool ADT shScram vs. Nsi ADT shHER2        | <0.0001 |
|           |                            | Pool ADT shScram vs. Pool Mock shHER2      | <0.0001 |
|           |                            | Pool ADT shScram vs. Pool ADT shHER2       | <0.0001 |
|           |                            | Nsi Mock shHER2 vs. Nsi ADT shHER2         | 0.9997  |
|           |                            | Nsi Mock shHER2 vs. Pool Mock shHER2       | >0.9999 |
|           |                            | Nsi Mock shHER2 vs. Pool ADT shHER2        | 0.9894  |
|           |                            | Nsi ADT shHER2 vs. Pool Mock shHER2        | >0.9999 |
|           |                            | Nsi ADT shHER2 vs. Pool ADT shHER2         | >0.9999 |
|           |                            | Pool Mock shHER2 vs. Pool ADT shHER2       | 0.9997  |
| Figure 3C | Unpaired t test Two-tailed | CWR Nsi p38MAPKi Vs CWR Nsi DMSO           | 0.0009  |
|           |                            | CWR Poolp38MAPKi Vs CWR Pool DMSO          | 0.004   |
| Figure 3D | Paired t test Two-tailed   | CRPC vs HN                                 | 0.05    |
| Figure 3E | ANOVA Dunnett's test       | Pool ADT Tocilizumab vs. Nsi Mock vehicle  | 0.0007  |
|           |                            | Pool ADT Tocilizumab vs. Nsi ADT vehicle   | 0.9997  |
|           |                            | Pool ADT Tocilizumab vs. Pool Mock vehicle | 0.0007  |
|           |                            | Pool ADT Tocilizumab vs. Pool ADT vehicle  | 0.0201  |

|                                                |        |
|------------------------------------------------|--------|
| Pool ADT Tocilizumab vs. Nsi Mock Tocilizumab  | 0.1408 |
| Pool ADT Tocilizumab vs. Nsi ADT Tocilizumab   | 0.9938 |
| Pool ADT Tocilizumab vs. Pool Mock Tocilizumab | 0.0028 |
| Nsi Mock vehicle vs. Nsi ADT vehicle           | 0.0004 |
| Nsi Mock vehicle vs. Pool Mock vehicle         | 0.9999 |
| Nsi Mock vehicle vs. Pool ADT vehicle          | 0.6635 |
| Nsi Mock vehicle vs. Nsi Mock Tocilizumab      | 0.1762 |
| Nsi Mock vehicle vs. Nsi ADT Tocilizumab       | 0.0002 |
| Nsi Mock vehicle vs. Pool Mock Tocilizumab     | 0.9934 |
| Nsi Mock vehicle vs. Pool ADT Tocilizumab      | 0.0007 |

Figure 3F ANOVA Tukey's Test

|                                                |         |
|------------------------------------------------|---------|
| Nsi Mock vehicle vs. Nsi ADT vehicle           | 0.998   |
| Nsi Mock vehicle vs. Pool Mock vehicle         | 0.0032  |
| Nsi Mock vehicle vs. Pool ADT vehicle          | <0.0001 |
| Nsi Mock vehicle vs. Nsi Mock Tocilizumab      | >0.9999 |
| Nsi Mock vehicle vs. Nsi ADT Tocilizumab       | 0.9971  |
| Nsi Mock vehicle vs. Pool Mock Tocilizumab     | 0.9163  |
| Nsi Mock vehicle vs. Pool ADT Tocilizumab      | 0.9969  |
| Nsi ADT vehicle vs. Pool Mock vehicle          | 0.0005  |
| Nsi ADT vehicle vs. Pool ADT vehicle           | <0.0001 |
| Nsi ADT vehicle vs. Nsi Mock Tocilizumab       | 0.9962  |
| Nsi ADT vehicle vs. Nsi ADT Tocilizumab        | >0.9999 |
| Nsi ADT vehicle vs. Pool Mock Tocilizumab      | 0.5822  |
| Nsi ADT vehicle vs. Pool ADT Tocilizumab       | >0.9999 |
| Pool Mock vehicle vs. Pool ADT vehicle         | 0.0071  |
| Pool Mock vehicle vs. Nsi Mock Tocilizumab     | 0.0038  |
| Pool Mock vehicle vs. Nsi ADT Tocilizumab      | 0.0005  |
| Pool Mock vehicle vs. Pool Mock Tocilizumab    | 0.0707  |
| Pool Mock vehicle vs. Pool ADT Tocilizumab     | 0.0005  |
| Pool ADT vehicle vs. Nsi Mock Tocilizumab      | <0.0001 |
| Pool ADT vehicle vs. Nsi ADT Tocilizumab       | <0.0001 |
| Pool ADT vehicle vs. Pool Mock Tocilizumab     | <0.0001 |
| Pool ADT vehicle vs. Pool ADT Tocilizumab      | <0.0001 |
| Nsi Mock Tocilizumab vs. Nsi ADT Tocilizumab   | 0.9947  |
| Nsi Mock Tocilizumab vs. Pool Mock Tocilizumab | 0.9371  |

|                                                |         |
|------------------------------------------------|---------|
| Nsi Mock Tocilizumab vs. Pool ADT Tocilizumab  | 0.9944  |
| Nsi ADT Tocilizumab vs. Pool Mock Tocilizumab  | 0.5561  |
| Nsi ADT Tocilizumab vs. Pool ADT Tocilizumab   | >0.9999 |
| Pool Mock Tocilizumab vs. Pool ADT Tocilizumab | 0.5517  |

Figure 3G ANOVA Tukey's Test

|                                                |         |
|------------------------------------------------|---------|
| Nsi Mock Vehicle vs. Nsi ADT Vehicle           | 0.0021  |
| Nsi Mock Vehicle vs. Pool Mock Vehicle         | 0.9879  |
| Nsi Mock Vehicle vs. Pool ADT Vehicle          | 0.9183  |
| Nsi Mock Vehicle vs. Nsi Mock Tocilizumab      | >0.9999 |
| Nsi Mock Vehicle vs. Nsi ADT Tocilizumab       | 0.0003  |
| Nsi Mock Vehicle vs. Pool Mock Tocilizumab     | 0.7335  |
| Nsi Mock Vehicle vs. Pool ADT Tocilizumab      | 0.0015  |
| Nsi ADT Vehicle vs. Pool Mock Vehicle          | 0.0002  |
| Nsi ADT Vehicle vs. Pool ADT Vehicle           | <0.0001 |
| Nsi ADT Vehicle vs. Nsi Mock Tocilizumab       | 0.0042  |
| Nsi ADT Vehicle vs. Nsi ADT Tocilizumab        | 0.9959  |
| Nsi ADT Vehicle vs. Pool Mock Tocilizumab      | <0.0001 |
| Nsi ADT Vehicle vs. Pool ADT Tocilizumab       | >0.9999 |
| Pool Mock Vehicle vs. Pool ADT Vehicle         | >0.9999 |
| Pool Mock Vehicle vs. Nsi Mock Tocilizumab     | 0.9501  |
| Pool Mock Vehicle vs. Nsi ADT Tocilizumab      | <0.0001 |
| Pool Mock Vehicle vs. Pool Mock Tocilizumab    | 0.9938  |
| Pool Mock Vehicle vs. Pool ADT Tocilizumab     | 0.0001  |
| Pool ADT Vehicle vs. Nsi Mock Tocilizumab      | 0.8135  |
| Pool ADT Vehicle vs. Nsi ADT Tocilizumab       | <0.0001 |
| Pool ADT Vehicle vs. Pool Mock Tocilizumab     | >0.9999 |
| Pool ADT Vehicle vs. Pool ADT Tocilizumab      | <0.0001 |
| Nsi Mock Tocilizumab vs. Nsi ADT Tocilizumab   | 0.0006  |
| Nsi Mock Tocilizumab vs. Pool Mock Tocilizumab | 0.5767  |
| Nsi Mock Tocilizumab vs. Pool ADT Tocilizumab  | 0.003   |
| Nsi ADT Tocilizumab vs. Pool Mock Tocilizumab  | <0.0001 |
| Nsi ADT Tocilizumab vs. Pool ADT Tocilizumab   | 0.9989  |
| Pool Mock Tocilizumab vs. Pool ADT Tocilizumab | <0.0001 |

Figure 3H ANOVA Tukey's Test

|                                      |         |
|--------------------------------------|---------|
| Nsi Mock Vehicle vs. Nsi ADT Vehicle | <0.0001 |
|--------------------------------------|---------|



|           |                            |                                                    |         |
|-----------|----------------------------|----------------------------------------------------|---------|
|           |                            | Nsi Mock Vehicle vs. Pool Mock Vehicle             | <0.0001 |
|           |                            | Nsi Mock Vehicle vs. Pool ADT Vehicle              | 0.9999  |
|           |                            | Nsi Mock Vehicle vs. Nsi Mock<br>Tocilizumab       | 0.9113  |
|           |                            | Nsi Mock Vehicle vs. Nsi ADT<br>Tocilizumab        | 0.8805  |
|           |                            | Nsi Mock Vehicle vs. Pool Mock<br>Tocilizumab      | >0.9999 |
|           |                            | Nsi Mock Vehicle vs. Pool ADT<br>Tocilizumab       | <0.0001 |
|           |                            | Nsi ADT Vehicle vs. Pool Mock Vehicle              | <0.0001 |
|           |                            | Nsi ADT Vehicle vs. Pool ADT Vehicle               | 0.992   |
|           |                            | Nsi ADT Vehicle vs. Nsi Mock<br>Tocilizumab        | >0.9999 |
|           |                            | Nsi ADT Vehicle vs. Nsi ADT<br>Tocilizumab         | 0.2387  |
|           |                            | Nsi ADT Vehicle vs. Pool Mock<br>Tocilizumab       | 0.9612  |
|           |                            | Nsi ADT Vehicle vs. Pool ADT<br>Tocilizumab        | 0.0168  |
|           |                            | Pool Mock Vehicle vs. Pool ADT Vehicle             | <0.0001 |
|           |                            | Pool Mock Vehicle vs. Nsi Mock<br>Tocilizumab      | <0.0001 |
|           |                            | Pool Mock Vehicle vs. Nsi ADT<br>Tocilizumab       | <0.0001 |
|           |                            | Pool Mock Vehicle vs. Pool Mock<br>Tocilizumab     | <0.0001 |
|           |                            | Pool Mock Vehicle vs. Pool ADT<br>Tocilizumab      | <0.0001 |
|           |                            | Pool ADT Vehicle vs. Nsi Mock<br>Tocilizumab       | <0.0001 |
|           |                            | Pool ADT Vehicle vs. Nsi ADT<br>Tocilizumab        | <0.0001 |
|           |                            | Pool ADT Vehicle vs. Pool Mock<br>Tocilizumab      | <0.0001 |
|           |                            | Pool ADT Vehicle vs. Pool ADT<br>Tocilizumab       | 0.9928  |
|           |                            | Nsi Mock Tocilizumab vs. Nsi ADT<br>Tocilizumab    | 0.6983  |
|           |                            | Nsi Mock Tocilizumab vs. Pool Mock<br>Tocilizumab  | >0.9999 |
|           |                            | Nsi Mock Tocilizumab vs. Pool ADT<br>Tocilizumab   | 0.2442  |
|           |                            | Nsi ADT Tocilizumab vs. Pool Mock<br>Tocilizumab   | 0.9636  |
|           |                            | Nsi ADT Tocilizumab vs. Pool ADT<br>Tocilizumab    | 0.84    |
|           |                            | Pool Mock Tocilizumab vs. Pool ADT<br>Tocilizumab  |         |
| Figure 3I | Unpaired t test Two-tailed | Anti-IL6 ADT vs Ctrl IgG ADT                       | 0.0003  |
| Figure 3J | Chi-square test            | Metastatic incidence in Tocilizumab<br>treated set | <0.001  |
| Figure 3L | ANOVA Tukey's Test         | Nsi Mock Vehicle vs. Nsi ADT Vehicle               | 0.5382  |
|           |                            | Nsi Mock Vehicle vs. Pool Mock Vehicle             | 0.6282  |
|           |                            | Nsi Mock Vehicle vs. Pool ADT Vehicle              | <0.0001 |
|           |                            | Nsi Mock Vehicle vs. Nsi Mock                      | >0.9999 |

|                                                   |         |
|---------------------------------------------------|---------|
| Tocilizumab                                       |         |
| Nsi Mock Vehicle vs. Nsi ADT<br>Tocilizumab       | 0.9958  |
| Nsi Mock Vehicle vs. Pool Mock<br>Tocilizumab     | 0.9988  |
| Nsi Mock Vehicle vs. Pool ADT<br>Tocilizumab      | >0.9999 |
| Nsi ADT Vehicle vs. Pool Mock Vehicle             | 0.0288  |
| Nsi ADT Vehicle vs. Pool ADT Vehicle              | <0.0001 |
| Nsi ADT Vehicle vs. Nsi Mock<br>Tocilizumab       | 0.642   |
| Nsi ADT Vehicle vs. Nsi ADT<br>Tocilizumab        | 0.9032  |
| Nsi ADT Vehicle vs. Pool Mock<br>Tocilizumab      | 0.2525  |
| Nsi ADT Vehicle vs. Pool ADT<br>Tocilizumab       | 0.3721  |
| Pool Mock Vehicle vs. Pool ADT Vehicle            | <0.0001 |
| Pool Mock Vehicle vs. Nsi Mock<br>Tocilizumab     | 0.5246  |
| Pool Mock Vehicle vs. Nsi ADT<br>Tocilizumab      | 0.2621  |
| Pool Mock Vehicle vs. Pool Mock<br>Tocilizumab    | 0.9115  |
| Pool Mock Vehicle vs. Pool ADT<br>Tocilizumab     | 0.7977  |
| Pool ADT Vehicle vs. Nsi Mock<br>Tocilizumab      | <0.0001 |
| Pool ADT Vehicle vs. Nsi ADT<br>Tocilizumab       | <0.0001 |
| Pool ADT Vehicle vs. Pool Mock<br>Tocilizumab     | <0.0001 |
| Pool ADT Vehicle vs. Pool ADT<br>Tocilizumab      | <0.0001 |
| Nsi Mock Tocilizumab vs. Nsi ADT<br>Tocilizumab   | 0.9993  |
| Nsi Mock Tocilizumab vs. Pool Mock<br>Tocilizumab | 0.9937  |
| Nsi Mock Tocilizumab vs. Pool ADT<br>Tocilizumab  | 0.9996  |
| Nsi ADT Tocilizumab vs. Pool Mock<br>Tocilizumab  | 0.8965  |
| Nsi ADT Tocilizumab vs. Pool ADT<br>Tocilizumab   | 0.9675  |
| Pool Mock Tocilizumab vs. Pool ADT<br>Tocilizumab | >0.9999 |

Figure 4A ANOVA Tukey's Test

|                        |        |
|------------------------|--------|
| Nsi Mock vs. CL3 Mock  | 0.9052 |
| Nsi Mock vs. Pool Mock | 0.0367 |
| Nsi Mock vs. Nsi ADT   | 0.0002 |
| Nsi Mock vs. CL3 ADT   | 0.0005 |
| Nsi Mock vs. Pool ADT  | 0.0012 |
| CL3 Mock vs. Pool Mock | 0.1895 |
| CL3 Mock vs. Nsi ADT   | 0.0008 |
| CL3 Mock vs. CL3 ADT   | 0.0023 |
| CL3 Mock vs. Pool ADT  | 0.0063 |
| Pool Mock vs. Nsi ADT  | 0.0513 |
| Pool Mock vs. CL3 ADT  | 0.1476 |
| Pool Mock vs. Pool ADT | 0.3661 |

|           |                    |                                            |         |
|-----------|--------------------|--------------------------------------------|---------|
|           |                    | Nsi ADT vs. CL3 ADT                        | 0.9844  |
|           |                    | Nsi ADT vs. Pool ADT                       | 0.7888  |
|           |                    | CL3 ADT vs. Pool ADT                       | 0.9861  |
| Figure 4B | ANOVA Tukey's Test | Nsi Mock vs. CL3 Mock                      | >0.9999 |
|           |                    | Nsi Mock vs. Pool Mock                     | >0.9999 |
|           |                    | Nsi Mock vs. Nsi ADT                       | >0.9999 |
|           |                    | Nsi Mock vs. CL3 ADT                       | <0.0001 |
|           |                    | Nsi Mock vs. Pool ADT                      | <0.0001 |
|           |                    | CL3 Mock vs. Pool Mock                     | >0.9999 |
|           |                    | CL3 Mock vs. Nsi ADT                       | >0.9999 |
|           |                    | CL3 Mock vs. CL3 ADT                       | <0.0001 |
|           |                    | CL3 Mock vs. Pool ADT                      | <0.0001 |
|           |                    | Pool Mock vs. Nsi ADT                      | 0.9991  |
|           |                    | Pool Mock vs. CL3 ADT                      | <0.0001 |
|           |                    | Pool Mock vs. Pool ADT                     | <0.0001 |
|           |                    | Nsi ADT vs. CL3 ADT                        | <0.0001 |
|           |                    | Nsi ADT vs. Pool ADT                       | <0.0001 |
|           |                    | CL3 ADT vs. Pool ADT                       | 0.9498  |
| Figure 4C | ANOVA Tukey's Test | Nsi Mock vs. CL3 Mock                      | >0.9999 |
|           |                    | Nsi Mock vs. Pool Mock                     | 0.9951  |
|           |                    | Nsi Mock vs. Nsi ADT                       | 0.9921  |
|           |                    | Nsi Mock vs. CL3 ADT                       | 0.0026  |
|           |                    | Nsi Mock vs. Pool ADT                      | 0.0038  |
|           |                    | CL3 Mock vs. Pool Mock                     | 0.9996  |
|           |                    | CL3 Mock vs. Nsi ADT                       | 0.9991  |
|           |                    | CL3 Mock vs. CL3 ADT                       | 0.0015  |
|           |                    | CL3 Mock vs. Pool ADT                      | 0.0023  |
|           |                    | Pool Mock vs. Nsi ADT                      | >0.9999 |
|           |                    | Pool Mock vs. CL3 ADT                      | 0.0007  |
|           |                    | Pool Mock vs. Pool ADT                     | 0.0011  |
|           |                    | Nsi ADT vs. CL3 ADT                        | 0.0006  |
|           |                    | Nsi ADT vs. Pool ADT                       | 0.0009  |
|           |                    | CL3 ADT vs. Pool ADT                       | >0.9999 |
| Figure 4D | ANOVA Tukey's Test | Nsi Mock Vehicle vs. Nsi ADT Vehicle       | 0.9873  |
|           |                    | Nsi Mock Vehicle vs. Pool Mock Vehicle     | 0.9996  |
|           |                    | Nsi Mock Vehicle vs. Pool ADT Vehicle      | <0.0001 |
|           |                    | Nsi Mock Vehicle vs. Nsi Mock Tocilizumab  | >0.9999 |
|           |                    | Nsi Mock Vehicle vs. Nsi ADT Tocilizumab   | >0.9999 |
|           |                    | Nsi Mock Vehicle vs. Pool Mock Tocilizumab | 0.9745  |
|           |                    | Nsi Mock Vehicle vs. Pool ADT Tocilizumab  | 0.3934  |
|           |                    | Nsi ADT Vehicle vs. Pool Mock Vehicle      | >0.9999 |

|                                                |         |
|------------------------------------------------|---------|
| Nsi ADT Vehicle vs. Pool ADT Vehicle           | <0.0001 |
| Nsi ADT Vehicle vs. Nsi Mock Tocilizumab       | 0.9612  |
| Nsi ADT Vehicle vs. Nsi ADT Tocilizumab        | 0.9994  |
| Nsi ADT Vehicle vs. Pool Mock Tocilizumab      | >0.9999 |
| Nsi ADT Vehicle vs. Pool ADT Tocilizumab       | 0.079   |
| Pool Mock Vehicle vs. Pool ADT Vehicle         | <0.0001 |
| Pool Mock Vehicle vs. Nsi Mock Tocilizumab     | 0.9965  |
| Pool Mock Vehicle vs. Nsi ADT Tocilizumab      | >0.9999 |
| Pool Mock Vehicle vs. Pool Mock Tocilizumab    | 0.9997  |
| Pool Mock Vehicle vs. Pool ADT Tocilizumab     | 0.1661  |
| Pool ADT Vehicle vs. Nsi Mock Tocilizumab      | <0.0001 |
| Pool ADT Vehicle vs. Nsi ADT Tocilizumab       | <0.0001 |
| Pool ADT Vehicle vs. Pool Mock Tocilizumab     | <0.0001 |
| Pool ADT Vehicle vs. Pool ADT Tocilizumab      | <0.0001 |
| Nsi Mock Tocilizumab vs. Nsi ADT Tocilizumab   | 0.9994  |
| Nsi Mock Tocilizumab vs. Pool Mock Tocilizumab | 0.9348  |
| Nsi Mock Tocilizumab vs. Pool ADT Tocilizumab  | 0.5095  |
| Nsi ADT Tocilizumab vs. Pool Mock Tocilizumab  | 0.9979  |
| Nsi ADT Tocilizumab vs. Pool ADT Tocilizumab   | 0.228   |
| Pool Mock Tocilizumab vs. Pool ADT Tocilizumab | 0.0613  |

Figure 4E ANOVA Tukey's Test

|                                             |         |
|---------------------------------------------|---------|
| Nsi Mock Vehicle vs. Nsi ADT Vehicle        | 0.9963  |
| Nsi Mock Vehicle vs. Pool Mock Vehicle      | >0.9999 |
| Nsi Mock Vehicle vs. Pool ADT Vehicle       | 0.0004  |
| Nsi Mock Vehicle vs. Nsi Mock Tocilizumab   | >0.9999 |
| Nsi Mock Vehicle vs. Nsi ADT Tocilizumab    | >0.9999 |
| Nsi Mock Vehicle vs. Pool Mock Tocilizumab  | 0.9998  |
| Nsi Mock Vehicle vs. Pool ADT Tocilizumab   | 0.834   |
| Nsi ADT Vehicle vs. Pool Mock Vehicle       | 0.9962  |
| Nsi ADT Vehicle vs. Pool ADT Vehicle        | 0.003   |
| Nsi ADT Vehicle vs. Nsi Mock Tocilizumab    | 0.9843  |
| Nsi ADT Vehicle vs. Nsi ADT Tocilizumab     | 0.9998  |
| Nsi ADT Vehicle vs. Pool Mock Tocilizumab   | >0.9999 |
| Nsi ADT Vehicle vs. Pool ADT Tocilizumab    | 0.9953  |
| Pool Mock Vehicle vs. Pool ADT Vehicle      | 0.0004  |
| Pool Mock Vehicle vs. Nsi Mock Tocilizumab  | >0.9999 |
| Pool Mock Vehicle vs. Nsi ADT Tocilizumab   | >0.9999 |
| Pool Mock Vehicle vs. Pool Mock Tocilizumab | 0.9998  |
| Pool Mock Vehicle vs. Pool ADT Tocilizumab  | 0.8328  |
| Pool ADT Vehicle vs. Nsi Mock Tocilizumab   | 0.0002  |
| Pool ADT Vehicle vs. Nsi ADT Tocilizumab    | 0.0009  |

|           |                            |                                                |          |
|-----------|----------------------------|------------------------------------------------|----------|
|           |                            | Pool ADT Vehicle vs. Pool Mock Tocilizumab     | 0.0015   |
|           |                            | Pool ADT Vehicle vs. Pool ADT Tocilizumab      | 0.0207   |
|           |                            | Nsi Mock Tocilizumab vs. Nsi ADT Tocilizumab   | 0.9998   |
|           |                            | Nsi Mock Tocilizumab vs. Pool Mock Tocilizumab | 0.998    |
|           |                            | Nsi Mock Tocilizumab vs. Pool ADT Tocilizumab  | 0.731    |
|           |                            | Nsi ADT Tocilizumab vs. Pool Mock Tocilizumab  | >0.9999  |
|           |                            | Nsi ADT Tocilizumab vs. Pool ADT Tocilizumab   | 0.9358   |
|           |                            | Pool Mock Tocilizumab vs. Pool ADT Tocilizumab | 0.9727   |
| Figure 4F | Unpaired t test Two-tailed | CRPC vs HN                                     | 0.0002   |
| Figure 4G | Pearson r                  | IL6 vs. PSA                                    | < 0.0001 |
| Figure 4I | ANOVA Tukey's Test         | Nsi Mock vs. CL3 Mock                          | >0.9999  |
|           |                            | Nsi Mock vs. Pool Mock                         | 0.9905   |
|           |                            | Nsi Mock vs. Nsi ADT                           | 0.9824   |
|           |                            | Nsi Mock vs. Pool ADT                          | <0.0001  |
|           |                            | Nsi Mock vs. CL3 ADT                           | <0.0001  |
|           |                            | CL3 Mock vs. Pool Mock                         | 0.9968   |
|           |                            | CL3 Mock vs. Nsi ADT                           | 0.9639   |
|           |                            | CL3 Mock vs. Pool ADT                          | <0.0001  |
|           |                            | CL3 Mock vs. CL3 ADT                           | <0.0001  |
|           |                            | Pool Mock vs. Nsi ADT                          | 0.7953   |
|           |                            | Pool Mock vs. Pool ADT                         | <0.0001  |
|           |                            | Pool Mock vs. CL3 ADT                          | <0.0001  |
|           |                            | Nsi ADT vs. Pool ADT                           | <0.0001  |
|           |                            | Nsi ADT vs. CL3 ADT                            | <0.0001  |
|           |                            | Pool ADT vs. CL3 ADT                           | 0.9994   |
| Figure 4J | ANOVA Tukey's Test         | Nsi Mock Vehicle vs. Nsi ADT Vehicle           | <0.0001  |
|           |                            | Nsi Mock Vehicle vs. Pool Mock Vehicle         | 0.9694   |
|           |                            | Nsi Mock Vehicle vs. Pool ADT Vehicle          | <0.0001  |
|           |                            | Nsi Mock Vehicle vs. Nsi Mock Tocilizumab      | 0.2392   |
|           |                            | Nsi Mock Vehicle vs. Nsi ADT Tocilizumab       | 0.2652   |
|           |                            | Nsi Mock Vehicle vs. Pool Mock Tocilizumab     | 0.6724   |
|           |                            | Nsi Mock Vehicle vs. Pool ADT Tocilizumab      | 0.9985   |
|           |                            | Nsi ADT Vehicle vs. Pool Mock Vehicle          | <0.0001  |
|           |                            | Nsi ADT Vehicle vs. Pool ADT Vehicle           | <0.0001  |
|           |                            | Nsi ADT Vehicle vs. Nsi Mock Tocilizumab       | <0.0001  |

|                                                |         |
|------------------------------------------------|---------|
| Nsi ADT Vehicle vs. Nsi ADT Tocilizumab        | 0.0482  |
| Nsi ADT Vehicle vs. Pool Mock Tocilizumab      | <0.0001 |
| Nsi ADT Vehicle vs. Pool ADT Tocilizumab       | 0.0004  |
| Pool Mock Vehicle vs. Pool ADT Vehicle         | <0.0001 |
| Pool Mock Vehicle vs. Nsi Mock Tocilizumab     | 0.8164  |
| Pool Mock Vehicle vs. Nsi ADT Tocilizumab      | 0.0316  |
| Pool Mock Vehicle vs. Pool Mock Tocilizumab    | 0.996   |
| Pool Mock Vehicle vs. Pool ADT Tocilizumab     | 0.7352  |
| Pool ADT Vehicle vs. Nsi Mock Tocilizumab      | <0.0001 |
| Pool ADT Vehicle vs. Nsi ADT Tocilizumab       | <0.0001 |
| Pool ADT Vehicle vs. Pool Mock Tocilizumab     | <0.0001 |
| Pool ADT Vehicle vs. Pool ADT Tocilizumab      | <0.0001 |
| Nsi Mock Tocilizumab vs. Nsi ADT Tocilizumab   | 0.0006  |
| Nsi Mock Tocilizumab vs. Pool Mock Tocilizumab | 0.9941  |
| Nsi Mock Tocilizumab vs. Pool ADT Tocilizumab  | 0.0701  |
| Nsi ADT Tocilizumab vs. Pool Mock Tocilizumab  | 0.0051  |
| Nsi ADT Tocilizumab vs. Pool ADT Tocilizumab   | 0.6162  |
| Pool Mock Tocilizumab vs. Pool ADT Tocilizumab | 0.3076  |

Figure 4L ANOVA Tukey's Test

|                        |         |
|------------------------|---------|
| Nsi Mock vs. CL3 Mock  | >0.9999 |
| Nsi Mock vs. Pool Mock | 0.9999  |
| Nsi Mock vs. Nsi ADT   | 0.9766  |
| Nsi Mock vs. CL3 ADT   | <0.0001 |
| Nsi Mock vs. Pool ADT  | <0.0001 |
| CL3 Mock vs. Pool Mock | >0.9999 |
| CL3 Mock vs. Nsi ADT   | 0.9789  |
| CL3 Mock vs. CL3 ADT   | <0.0001 |
| CL3 Mock vs. Pool ADT  | <0.0001 |
| Pool Mock vs. Nsi ADT  | 0.9959  |
| Pool Mock vs. CL3 ADT  | <0.0001 |
| Pool Mock vs. Pool ADT | <0.0001 |
| Nsi ADT vs. CL3 ADT    | <0.0001 |
| Nsi ADT vs. Pool ADT   | <0.0001 |
| CL3 ADT vs. Pool ADT   | 0.9929  |

Figure 4M ANOVA Tukey's Test

|                                            |         |
|--------------------------------------------|---------|
| Nsi Mock Vehicle vs. Nsi ADT Vehicle       | 0.0694  |
| Nsi Mock Vehicle vs. Pool Mock Vehicle     | 0.4763  |
| Nsi Mock Vehicle vs. Pool ADT Vehicle      | <0.0001 |
| Nsi Mock Vehicle vs. Nsi Mock Tocilizumab  | 0.9974  |
| Nsi Mock Vehicle vs. Nsi ADT Tocilizumab   | 0.1745  |
| Nsi Mock Vehicle vs. Pool Mock Tocilizumab | 0.9855  |
| Nsi Mock Vehicle vs. Pool ADT Tocilizumab  | 0.003   |

|           |                    |                                                |         |
|-----------|--------------------|------------------------------------------------|---------|
|           |                    | Nsi ADT Vehicle vs. Pool Mock Vehicle          | 0.9603  |
|           |                    | Nsi ADT Vehicle vs. Pool ADT Vehicle           | <0.0001 |
|           |                    | Nsi ADT Vehicle vs. Nsi Mock Tocilizumab       | 0.014   |
|           |                    | Nsi ADT Vehicle vs. Nsi ADT Tocilizumab        | 0.9998  |
|           |                    | Nsi ADT Vehicle vs. Pool Mock Tocilizumab      | 0.3721  |
|           |                    | Nsi ADT Vehicle vs. Pool ADT Tocilizumab       | 0.914   |
|           |                    | Pool Mock Vehicle vs. Pool ADT Vehicle         | <0.0001 |
|           |                    | Pool Mock Vehicle vs. Nsi Mock Tocilizumab     | 0.1602  |
|           |                    | Pool Mock Vehicle vs. Nsi ADT Tocilizumab      | 0.9983  |
|           |                    | Pool Mock Vehicle vs. Pool Mock Tocilizumab    | 0.9401  |
|           |                    | Pool Mock Vehicle vs. Pool ADT Tocilizumab     | 0.3247  |
|           |                    | Pool ADT Vehicle vs. Nsi Mock Tocilizumab      | <0.0001 |
|           |                    | Pool ADT Vehicle vs. Nsi ADT Tocilizumab       | <0.0001 |
|           |                    | Pool ADT Vehicle vs. Pool Mock Tocilizumab     | <0.0001 |
|           |                    | Pool ADT Vehicle vs. Pool ADT Tocilizumab      | <0.0001 |
|           |                    | Nsi Mock Tocilizumab vs. Nsi ADT Tocilizumab   | 0.0417  |
|           |                    | Nsi Mock Tocilizumab vs. Pool Mock Tocilizumab | 0.7762  |
|           |                    | Nsi Mock Tocilizumab vs. Pool ADT Tocilizumab  | 0.0005  |
|           |                    | Nsi ADT Tocilizumab vs. Pool Mock Tocilizumab  | 0.6443  |
|           |                    | Nsi ADT Tocilizumab vs. Pool ADT Tocilizumab   | 0.6991  |
|           |                    | Pool Mock Tocilizumab vs. Pool ADT Tocilizumab | 0.0303  |
|           |                    | FFA nMol/ul vs. IL6 pMol/ml                    | 0.037   |
| Figure 4N | Spearman r         |                                                |         |
| Figure 5A | ANOVA Tukey's Test | Nsi Mock Vehicle vs. Nsi ADT Vehicle           | 0.6195  |
|           |                    | Nsi Mock Vehicle vs. Pool Mock Vehicle         | 0.9666  |
|           |                    | Nsi Mock Vehicle vs. Pool ADT Vehicle          | <0.0001 |
|           |                    | Nsi Mock Vehicle vs. Nsi Mock Tocilizumab      | 0.9913  |
|           |                    | Nsi Mock Vehicle vs. Nsi ADT Tocilizumab       | 0.9999  |
|           |                    | Nsi Mock Vehicle vs. Pool Mock Tocilizumab     | >0.9999 |
|           |                    | Nsi Mock Vehicle vs. Pool ADT Tocilizumab      | >0.9999 |
|           |                    | Nsi ADT Vehicle vs. Pool Mock Vehicle          | 0.979   |
|           |                    | Nsi ADT Vehicle vs. Pool ADT Vehicle           | 0.0022  |
|           |                    | Nsi ADT Vehicle vs. Nsi Mock Tocilizumab       | 0.2154  |
|           |                    | Nsi ADT Vehicle vs. Nsi ADT Tocilizumab        | 0.4849  |
|           |                    | Nsi ADT Vehicle vs. Pool Mock Tocilizumab      | 0.6614  |
|           |                    | Nsi ADT Vehicle vs. Pool ADT Tocilizumab       | 0.4106  |
|           |                    | Pool Mock Vehicle vs. Pool ADT Vehicle         | 0.0001  |
|           |                    | Pool Mock Vehicle vs. Nsi Mock Tocilizumab     | 0.5914  |
|           |                    | Pool Mock Vehicle vs. Nsi ADT Tocilizumab      | 0.8751  |
|           |                    | Pool Mock Vehicle vs. Pool Mock Tocilizumab    | 0.9779  |

|                                                |         |
|------------------------------------------------|---------|
| Pool Mock Vehicle vs. Pool ADT Tocilizumab     | 0.87    |
| Pool ADT Vehicle vs. Nsi Mock Tocilizumab      | <0.0001 |
| Pool ADT Vehicle vs. Nsi ADT Tocilizumab       | <0.0001 |
| Pool ADT Vehicle vs. Pool Mock Tocilizumab     | <0.0001 |
| Pool ADT Vehicle vs. Pool ADT Tocilizumab      | <0.0001 |
| Nsi Mock Tocilizumab vs. Nsi ADT Tocilizumab   | >0.9999 |
| Nsi Mock Tocilizumab vs. Pool Mock Tocilizumab | 0.9859  |
| Nsi Mock Tocilizumab vs. Pool ADT Tocilizumab  | 0.9981  |
| Nsi ADT Tocilizumab vs. Pool Mock Tocilizumab  | 0.9996  |
| Nsi ADT Tocilizumab vs. Pool ADT Tocilizumab   | >0.9999 |
| Pool Mock Tocilizumab vs. Pool ADT Tocilizumab | >0.9999 |

Figure 5B ANOVA Tukey's Test

|                                                |         |
|------------------------------------------------|---------|
| Nsi Mock Vehicle vs. Nsi ADT Vehicle           | 0.0003  |
| Nsi Mock Vehicle vs. Pool Mock Vehicle         | 0.9821  |
| Nsi Mock Vehicle vs. Pool ADT Vehicle          | >0.9999 |
| Nsi Mock Vehicle vs. Nsi Mock Simvastatin      | 0.9957  |
| Nsi Mock Vehicle vs. Nsi ADT Simvastatin       | <0.0001 |
| Nsi Mock Vehicle vs. Pool Mock Simvastatin     | 0.3581  |
| Nsi Mock Vehicle vs. Pool ADT Simvastatin      | 0.0016  |
| Nsi ADT Vehicle vs. Pool Mock Vehicle          | <0.0001 |
| Nsi ADT Vehicle vs. Pool ADT Vehicle           | 0.0002  |
| Nsi ADT Vehicle vs. Nsi Mock Simvastatin       | 0.0026  |
| Nsi ADT Vehicle vs. Nsi ADT Simvastatin        | 0.0077  |
| Nsi ADT Vehicle vs. Pool Mock Simvastatin      | <0.0001 |
| Nsi ADT Vehicle vs. Pool ADT Simvastatin       | 0.9993  |
| Pool Mock Vehicle vs. Pool ADT Vehicle         | 0.9982  |
| Pool Mock Vehicle vs. Nsi Mock Simvastatin     | 0.7241  |
| Pool Mock Vehicle vs. Nsi ADT Simvastatin      | <0.0001 |
| Pool Mock Vehicle vs. Pool Mock Simvastatin    | 0.8849  |
| Pool Mock Vehicle vs. Pool ADT Simvastatin     | 0.0001  |
| Pool ADT Vehicle vs. Nsi Mock Simvastatin      | 0.969   |
| Pool ADT Vehicle vs. Nsi ADT Simvastatin       | <0.0001 |
| Pool ADT Vehicle vs. Pool Mock Simvastatin     | 0.5325  |
| Pool ADT Vehicle vs. Pool ADT Simvastatin      | 0.0007  |
| Nsi Mock Simvastatin vs. Nsi ADT Simvastatin   | <0.0001 |
| Nsi Mock Simvastatin vs. Pool Mock Simvastatin | 0.0939  |
| Nsi Mock Simvastatin vs. Pool ADT Simvastatin  | 0.0109  |
| Nsi ADT Simvastatin vs. Pool Mock Simvastatin  | <0.0001 |
| Nsi ADT Simvastatin vs. Pool ADT Simvastatin   | 0.0018  |



|           |                    |                                                |         |
|-----------|--------------------|------------------------------------------------|---------|
|           |                    | Pool Mock Simvastatin vs. Pool ADT Simvastatin | <0.0001 |
| Figure 5E | ANOVA Tukey's Test | Nsi Mock vs. CL3 Mock                          | 0.1827  |
|           |                    | Nsi Mock vs. Pool Mock                         | 0.6922  |
|           |                    | Nsi Mock vs. Nsi ADT                           | 0.1475  |
|           |                    | Nsi Mock vs. CL3 ADT                           | 0.0007  |
|           |                    | Nsi Mock vs. Pool ADT                          | 0.0005  |
|           |                    | CL3 Mock vs. Pool Mock                         | 0.9197  |
|           |                    | CL3 Mock vs. Nsi ADT                           | 0.0005  |
|           |                    | CL3 Mock vs. CL3 ADT                           | 0.1816  |
|           |                    | CL3 Mock vs. Pool ADT                          | 0.1405  |
|           |                    | Pool Mock vs. Nsi ADT                          | 0.006   |
|           |                    | Pool Mock vs. CL3 ADT                          | 0.024   |
|           |                    | Pool Mock vs. Pool ADT                         | 0.0174  |
|           |                    | Nsi ADT vs. CL3 ADT                            | <0.0001 |
|           |                    | Nsi ADT vs. Pool ADT                           | <0.0001 |
|           |                    | CL3 ADT vs. Pool ADT                           | >0.9999 |
| Figure 5F | ANOVA Tukey's Test | Nsi Mock Vehicle vs. Nsi ADT Vehicle           | 0.9984  |
|           |                    | Nsi Mock Vehicle vs. Pool Mock Vehicle         | 0.9806  |
|           |                    | Nsi Mock Vehicle vs. Pool ADT Vehicle          | 0.0074  |
|           |                    | Nsi Mock Vehicle vs. Nsi Mock Tocilizumab      | 0.9975  |
|           |                    | Nsi Mock Vehicle vs. Nsi ADT Tocilizumab       | 0.8658  |
|           |                    | Nsi Mock Vehicle vs. Pool Mock Tocilizumab     | >0.9999 |
|           |                    | Nsi Mock Vehicle vs. Pool ADT Tocilizumab      | 0.6028  |
|           |                    | Nsi ADT Vehicle vs. Pool Mock Vehicle          | 0.7935  |
|           |                    | Nsi ADT Vehicle vs. Pool ADT Vehicle           | 0.0023  |
|           |                    | Nsi ADT Vehicle vs. Nsi Mock Tocilizumab       | >0.9999 |
|           |                    | Nsi ADT Vehicle vs. Nsi ADT Tocilizumab        | 0.9934  |
|           |                    | Nsi ADT Vehicle vs. Pool Mock Tocilizumab      | 0.9931  |
|           |                    | Nsi ADT Vehicle vs. Pool ADT Tocilizumab       | 0.9054  |
|           |                    | Pool Mock Vehicle vs. Pool ADT Vehicle         | 0.043   |
|           |                    | Pool Mock Vehicle vs. Nsi Mock Tocilizumab     | 0.7696  |
|           |                    | Pool Mock Vehicle vs. Nsi ADT Tocilizumab      | 0.3692  |
|           |                    | Pool Mock Vehicle vs. Pool Mock Tocilizumab    | 0.9937  |
|           |                    | Pool Mock Vehicle vs. Pool ADT Tocilizumab     | 0.1758  |
|           |                    | Pool ADT Vehicle vs. Nsi Mock Tocilizumab      | 0.0021  |
|           |                    | Pool ADT Vehicle vs. Nsi ADT Tocilizumab       | 0.0006  |
|           |                    | Pool ADT Vehicle vs. Pool Mock Tocilizumab     | 0.0102  |
|           |                    | Pool ADT Vehicle vs. Pool ADT Tocilizumab      | 0.0002  |
|           |                    | Nsi Mock Tocilizumab vs. Nsi ADT Tocilizumab   | 0.9955  |
|           |                    | Nsi Mock Tocilizumab vs. Pool Mock Tocilizumab | 0.9903  |
|           |                    | Nsi Mock Tocilizumab vs. Pool ADT Tocilizumab  | 0.9204  |

|                                                |        |
|------------------------------------------------|--------|
| Nsi ADT Tocilizumab vs. Pool Mock Tocilizumab  | 0.7904 |
| Nsi ADT Tocilizumab vs. Pool ADT Tocilizumab   | 0.9995 |
| Pool Mock Tocilizumab vs. Pool ADT Tocilizumab | 0.5076 |

Figure 6A ANOVA Tukey's Test

|                                                                   |         |
|-------------------------------------------------------------------|---------|
| 0                                                                 |         |
| Nsi VC vs. Pool VC                                                | >0.9999 |
| Nsi VC vs. Nsi SRB1KO                                             | >0.9999 |
| Nsi VC vs. Pool SRB1 KO                                           | >0.9999 |
| Nsi VC vs. Nsi 10 $\mu$ M ITX5061                                 | >0.9999 |
| Nsi VC vs. Pool 10 $\mu$ M ITX5061                                | >0.9999 |
| Nsi VC vs. Nsi SRB1KO 10 $\mu$ M ITX5061                          | >0.9999 |
| Nsi VC vs. Pool SRB1 KO 10 $\mu$ M ITX5061                        | >0.9999 |
| Pool VC vs. Nsi SRB1KO                                            | >0.9999 |
| Pool VC vs. Pool SRB1 KO                                          | >0.9999 |
| Pool VC vs. Nsi 10 $\mu$ M ITX5061                                | >0.9999 |
| Pool VC vs. Pool 10 $\mu$ M ITX5061                               | >0.9999 |
| Pool VC vs. Nsi SRB1KO 10 $\mu$ M ITX5061                         | >0.9999 |
| Pool VC vs. Pool SRB1 KO 10 $\mu$ M ITX5061                       | >0.9999 |
| Nsi SRB1KO vs. Pool SRB1 KO                                       | >0.9999 |
| Nsi SRB1KO vs. Nsi 10 $\mu$ M ITX5061                             | >0.9999 |
| Nsi SRB1KO vs. Pool 10 $\mu$ M ITX5061                            | >0.9999 |
| Nsi SRB1KO vs. Nsi SRB1KO 10 $\mu$ M ITX5061                      | >0.9999 |
| Nsi SRB1KO vs. Pool SRB1 KO 10 $\mu$ M ITX5061                    | >0.9999 |
| Pool SRB1 KO vs. Nsi 10 $\mu$ M ITX5061                           | >0.9999 |
| Pool SRB1 KO vs. Pool 10 $\mu$ M ITX5061                          | >0.9999 |
| Pool SRB1 KO vs. Nsi SRB1KO 10 $\mu$ M ITX5061                    | >0.9999 |
| Pool SRB1 KO vs. Pool SRB1 KO 10 $\mu$ M ITX5061                  | >0.9999 |
| Nsi 10 $\mu$ M ITX5061 vs. Pool 10 $\mu$ M ITX5061                | >0.9999 |
| Nsi 10 $\mu$ M ITX5061 vs. Nsi SRB1KO 10 $\mu$ M ITX5061          | >0.9999 |
| Nsi 10 $\mu$ M ITX5061 vs. Pool SRB1 KO 10 $\mu$ M ITX5061        | >0.9999 |
| Pool 10 $\mu$ M ITX5061 vs. Nsi SRB1KO 10 $\mu$ M ITX5061         | >0.9999 |
| Pool 10 $\mu$ M ITX5061 vs. Pool SRB1 KO 10 $\mu$ M ITX5061       | >0.9999 |
| Nsi SRB1KO 10 $\mu$ M ITX5061 vs. Pool SRB1 KO 10 $\mu$ M ITX5061 | >0.9999 |

|                                    |         |
|------------------------------------|---------|
| 2                                  |         |
| Nsi VC vs. Pool VC                 | <0.0001 |
| Nsi VC vs. Nsi SRB1KO              | 0.9993  |
| Nsi VC vs. Pool SRB1 KO            | 0.9999  |
| Nsi VC vs. Nsi 10 $\mu$ M ITX5061  | 0.99    |
| Nsi VC vs. Pool 10 $\mu$ M ITX5061 | >0.9999 |

|                                                                   |         |
|-------------------------------------------------------------------|---------|
| Nsi VC vs. Nsi SRB1KO 10 $\mu$ M ITX5061                          | 0.9963  |
| Nsi VC vs. Pool SRB1 KO 10 $\mu$ M ITX5061                        | 0.9988  |
| Pool VC vs. Nsi SRB1KO                                            | <0.0001 |
| Pool VC vs. Pool SRB1 KO                                          | <0.0001 |
| Pool VC vs. Nsi 10 $\mu$ M ITX5061                                | <0.0001 |
| Pool VC vs. Pool 10 $\mu$ M ITX5061                               | <0.0001 |
| Pool VC vs. Nsi SRB1KO 10 $\mu$ M ITX5061                         | <0.0001 |
| Pool VC vs. Pool SRB1 KO 10 $\mu$ M ITX5061                       | <0.0001 |
| Nsi SRB1KO vs. Pool SRB1 KO                                       | >0.9999 |
| Nsi SRB1KO vs. Nsi 10 $\mu$ M ITX5061                             | 0.8608  |
| Nsi SRB1KO vs. Pool 10 $\mu$ M ITX5061                            | 0.9841  |
| Nsi SRB1KO vs. Nsi SRB1KO 10 $\mu$ M ITX5061                      | 0.9107  |
| Nsi SRB1KO vs. Pool SRB1 KO 10 $\mu$ M ITX5061                    | 0.9448  |
| Pool SRB1 KO vs. Nsi 10 $\mu$ M ITX5061                           | 0.9067  |
| Pool SRB1 KO vs. Pool 10 $\mu$ M ITX5061                          | 0.9929  |
| Pool SRB1 KO vs. Nsi SRB1KO 10 $\mu$ M ITX5061                    | 0.9448  |
| Pool SRB1 KO vs. Pool SRB1 KO 10 $\mu$ M ITX5061                  | 0.9687  |
| Nsi 10 $\mu$ M ITX5061 vs. Pool 10 $\mu$ M ITX5061                | 0.9997  |
| Nsi 10 $\mu$ M ITX5061 vs. Nsi SRB1KO 10 $\mu$ M ITX5061          | >0.9999 |
| Nsi 10 $\mu$ M ITX5061 vs. Pool SRB1 KO 10 $\mu$ M ITX5061        | >0.9999 |
| Pool 10 $\mu$ M ITX5061 vs. Nsi SRB1KO 10 $\mu$ M ITX5061         | >0.9999 |
| Pool 10 $\mu$ M ITX5061 vs. Pool SRB1 KO 10 $\mu$ M ITX5061       | >0.9999 |
| Nsi SRB1KO 10 $\mu$ M ITX5061 vs. Pool SRB1 KO 10 $\mu$ M ITX5061 | >0.9999 |

4

|                                             |         |
|---------------------------------------------|---------|
| Nsi VC vs. Pool VC                          | <0.0001 |
| Nsi VC vs. Nsi SRB1KO                       | 0.8556  |
| Nsi VC vs. Pool SRB1 KO                     | >0.9999 |
| Nsi VC vs. Nsi 10 $\mu$ M ITX5061           | 0.0248  |
| Nsi VC vs. Pool 10 $\mu$ M ITX5061          | 0.9841  |
| Nsi VC vs. Nsi SRB1KO 10 $\mu$ M ITX5061    | 0.0416  |
| Nsi VC vs. Pool SRB1 KO 10 $\mu$ M ITX5061  | 0.2467  |
| Pool VC vs. Nsi SRB1KO                      | <0.0001 |
| Pool VC vs. Pool SRB1 KO                    | <0.0001 |
| Pool VC vs. Nsi 10 $\mu$ M ITX5061          | <0.0001 |
| Pool VC vs. Pool 10 $\mu$ M ITX5061         | <0.0001 |
| Pool VC vs. Nsi SRB1KO 10 $\mu$ M ITX5061   | <0.0001 |
| Pool VC vs. Pool SRB1 KO 10 $\mu$ M ITX5061 | <0.0001 |
| Nsi SRB1KO vs. Pool SRB1 KO                 | 0.8556  |
| Nsi SRB1KO vs. Nsi 10 $\mu$ M ITX5061       | 0.4644  |
| Nsi SRB1KO vs. Pool 10 $\mu$ M ITX5061      | 0.9997  |

|                                                                   |         |
|-------------------------------------------------------------------|---------|
| Nsi SRB1KO vs. Nsi SRB1KO 10 $\mu$ M ITX5061                      | 0.5925  |
| Nsi SRB1KO vs. Pool SRB1 KO 10 $\mu$ M ITX5061                    | 0.9647  |
| Pool SRB1 KO vs. Nsi 10 $\mu$ M ITX5061                           | 0.0248  |
| Pool SRB1 KO vs. Pool 10 $\mu$ M ITX5061                          | 0.9841  |
| Pool SRB1 KO vs. Nsi SRB1KO 10 $\mu$ M ITX5061                    | 0.0416  |
| Pool SRB1 KO vs. Pool SRB1 KO 10 $\mu$ M ITX5061                  | 0.2467  |
| Nsi 10 $\mu$ M ITX5061 vs. Pool 10 $\mu$ M ITX5061                | 0.2071  |
| Nsi 10 $\mu$ M ITX5061 vs. Nsi SRB1KO 10 $\mu$ M ITX5061          | >0.9999 |
| Nsi 10 $\mu$ M ITX5061 vs. Pool SRB1 KO 10 $\mu$ M ITX5061        | 0.9724  |
| Pool 10 $\mu$ M ITX5061 vs. Nsi SRB1KO 10 $\mu$ M ITX5061         | 0.2969  |
| Pool 10 $\mu$ M ITX5061 vs. Pool SRB1 KO 10 $\mu$ M ITX5061       | 0.7858  |
| Nsi SRB1KO 10 $\mu$ M ITX5061 vs. Pool SRB1 KO 10 $\mu$ M ITX5061 | 0.9922  |

Figure 6B ANOVA Tukey's Test

|                                              |         |
|----------------------------------------------|---------|
| FM                                           |         |
| Nsi CTRL vs. Pool SPRY2 KD CTRL              | 0.9043  |
| Nsi CTRL vs. Nsi SRB1 KO                     | 0.9806  |
| Nsi CTRL vs. Pool SPRY2 KD SRB1 KO           | 0.7746  |
| Pool SPRY2 KD CTRL vs. Nsi SRB1 KO           | 0.9906  |
| Pool SPRY2 KD CTRL vs. Pool SPRY2 KD SRB1 KO | 0.3883  |
| Nsi SRB1 KO vs. Pool SPRY2 KD SRB1 KO        | 0.5533  |
| FM ITX5061                                   |         |
| Nsi CTRL vs. Pool SPRY2 KD CTRL              | 0.9917  |
| Nsi CTRL vs. Nsi SRB1 KO                     | 0.6755  |
| Nsi CTRL vs. Pool SPRY2 KD SRB1 KO           | 0.9865  |
| Pool SPRY2 KD CTRL vs. Nsi SRB1 KO           | 0.5079  |
| Pool SPRY2 KD CTRL vs. Pool SPRY2 KD SRB1 KO | >0.9999 |
| Nsi SRB1 KO vs. Pool SPRY2 KD SRB1 KO        | 0.4783  |
| ADT                                          |         |
| Nsi CTRL vs. Pool SPRY2 KD CTRL              | 0.0065  |
| Nsi CTRL vs. Nsi SRB1 KO                     | <0.0001 |
| Nsi CTRL vs. Pool SPRY2 KD SRB1 KO           | <0.0001 |
| Pool SPRY2 KD CTRL vs. Nsi SRB1 KO           | <0.0001 |
| Pool SPRY2 KD CTRL vs. Pool SPRY2 KD SRB1 KO | <0.0001 |
| Nsi SRB1 KO vs. Pool SPRY2 KD SRB1 KO        | 0.8823  |
| ADT ITX5061                                  |         |
| Nsi CTRL vs. Pool SPRY2 KD CTRL              | 0.9317  |
| Nsi CTRL vs. Nsi SRB1 KO                     | 0.9834  |

|                                              |         |
|----------------------------------------------|---------|
| Nsi CTRL vs. Pool SPRY2 KD SRB1 KO           | 0.9761  |
| Pool SPRY2 KD CTRL vs. Nsi SRB1 KO           | 0.9952  |
| Pool SPRY2 KD CTRL vs. Pool SPRY2 KD SRB1 KO | 0.9976  |
| Nsi SRB1 KO vs. Pool SPRY2 KD SRB1 KO        | >0.9999 |

Figure 6C

ANOVA Tukey's Test

|                                         |         |
|-----------------------------------------|---------|
| Nsi Mock Vehicle vs. Nsi ADT Vehicle    | 0.0039  |
| Nsi Mock Vehicle vs. Pool Mock Vehicle  | >0.9999 |
| Nsi Mock Vehicle vs. Pool ADT Vehicle   | >0.9999 |
| Nsi Mock Vehicle vs. Nsi Mock ITX5061   | 0.5485  |
| Nsi Mock Vehicle vs. Nsi ADT ITX5061    | 0.0009  |
| Nsi Mock Vehicle vs. Pool Mock ITX5061  | 0.9978  |
| Nsi Mock Vehicle vs. Pool ADT ITX5061   | 0.016   |
| Nsi ADT Vehicle vs. Pool Mock Vehicle   | 0.0036  |
| Nsi ADT Vehicle vs. Pool ADT Vehicle    | 0.0014  |
| Nsi ADT Vehicle vs. Nsi Mock ITX5061    | 0.3146  |
| Nsi ADT Vehicle vs. Nsi ADT ITX5061     | 0.9993  |
| Nsi ADT Vehicle vs. Pool Mock ITX5061   | 0.0007  |
| Nsi ADT Vehicle vs. Pool ADT ITX5061    | 0.9994  |
| Pool Mock Vehicle vs. Pool ADT Vehicle  | >0.9999 |
| Pool Mock Vehicle vs. Nsi Mock ITX5061  | 0.5246  |
| Pool Mock Vehicle vs. Nsi ADT ITX5061   | 0.0008  |
| Pool Mock Vehicle vs. Pool Mock ITX5061 | 0.9985  |
| Pool Mock Vehicle vs. Pool ADT ITX5061  | 0.0146  |
| Pool ADT Vehicle vs. Nsi Mock ITX5061   | 0.3232  |
| Pool ADT Vehicle vs. Nsi ADT ITX5061    | 0.0003  |
| Pool ADT Vehicle vs. Pool Mock ITX5061  | >0.9999 |
| Pool ADT Vehicle vs. Pool ADT ITX5061   | 0.0059  |
| Nsi Mock ITX5061 vs. Nsi ADT ITX5061    | 0.1163  |
| Nsi Mock ITX5061 vs. Pool Mock ITX5061  | 0.2046  |
| Nsi Mock ITX5061 vs. Pool ADT ITX5061   | 0.6331  |
| Nsi ADT ITX5061 vs. Pool Mock ITX5061   | 0.0001  |
| Nsi ADT ITX5061 vs. Pool ADT ITX5061    | 0.9586  |
| Pool Mock ITX5061 vs. Pool ADT ITX5061  | 0.0029  |

Figure 6D

ANOVA Tukey's Test

|                                            |         |
|--------------------------------------------|---------|
| Nsi Mock Vehicle vs. Nsi ADT Vehicle       | 0.0802  |
| Nsi Mock Vehicle vs. Pool Mock Vehicle     | 0.0446  |
| Nsi Mock Vehicle vs. Pool ADT Vehicle      | 0.0327  |
| Nsi Mock Vehicle vs. Nsi Mock Simvastatin  | 0.9389  |
| Nsi Mock Vehicle vs. Nsi ADT Simvastatin   | 0.095   |
| Nsi Mock Vehicle vs. Pool Mock Simvastatin | 0.6123  |
| Nsi Mock Vehicle vs. Pool ADT Simvastatin  | 0.0867  |
| Nsi Mock Vehicle vs. Nsi Mock ITX5061      | >0.9999 |
| Nsi Mock Vehicle vs. Nsi ADT ITX5061       | 0.0798  |

|                                                |         |
|------------------------------------------------|---------|
| Nsi Mock Vehicle vs. Pool Mock ITX5061         | >0.9999 |
| Nsi Mock Vehicle vs. Pool ADT ITX5061          | 0.0901  |
| Nsi ADT Vehicle vs. Pool Mock Vehicle          | <0.0001 |
| Nsi ADT Vehicle vs. Pool ADT Vehicle           | <0.0001 |
| Nsi ADT Vehicle vs. Nsi Mock Simvastatin       | 0.7336  |
| Nsi ADT Vehicle vs. Nsi ADT Simvastatin        | >0.9999 |
| Nsi ADT Vehicle vs. Pool Mock Simvastatin      | 0.9772  |
| Nsi ADT Vehicle vs. Pool ADT Simvastatin       | >0.9999 |
| Nsi ADT Vehicle vs. Nsi Mock ITX5061           | 0.248   |
| Nsi ADT Vehicle vs. Nsi ADT ITX5061            | >0.9999 |
| Nsi ADT Vehicle vs. Pool Mock ITX5061          | 0.2212  |
| Nsi ADT Vehicle vs. Pool ADT ITX5061           | >0.9999 |
| Pool Mock Vehicle vs. Pool ADT Vehicle         | >0.9999 |
| Pool Mock Vehicle vs. Nsi Mock Simvastatin     | 0.0015  |
| Pool Mock Vehicle vs. Nsi ADT Simvastatin      | <0.0001 |
| Pool Mock Vehicle vs. Pool Mock Simvastatin    | 0.0003  |
| Pool Mock Vehicle vs. Pool ADT Simvastatin     | <0.0001 |
| Pool Mock Vehicle vs. Nsi Mock ITX5061         | 0.0115  |
| Pool Mock Vehicle vs. Nsi ADT ITX5061          | <0.0001 |
| Pool Mock Vehicle vs. Pool Mock ITX5061        | 0.0134  |
| Pool Mock Vehicle vs. Pool ADT ITX5061         | <0.0001 |
| Pool ADT Vehicle vs. Nsi Mock Simvastatin      | 0.0011  |
| Pool ADT Vehicle vs. Nsi ADT Simvastatin       | <0.0001 |
| Pool ADT Vehicle vs. Pool Mock Simvastatin     | 0.0002  |
| Pool ADT Vehicle vs. Pool ADT Simvastatin      | <0.0001 |
| Pool ADT Vehicle vs. Nsi Mock ITX5061          | 0.0082  |
| Pool ADT Vehicle vs. Nsi ADT ITX5061           | <0.0001 |
| Pool ADT Vehicle vs. Pool Mock ITX5061         | 0.0097  |
| Pool ADT Vehicle vs. Pool ADT ITX5061          | <0.0001 |
| Nsi Mock Simvastatin vs. Nsi ADT Simvastatin   | 0.7804  |
| Nsi Mock Simvastatin vs. Pool Mock Simvastatin | >0.9999 |
| Nsi Mock Simvastatin vs. Pool ADT Simvastatin  | 0.7555  |
| Nsi Mock Simvastatin vs. Nsi Mock ITX5061      | 0.999   |
| Nsi Mock Simvastatin vs. Nsi ADT ITX5061       | 0.7322  |
| Nsi Mock Simvastatin vs. Pool Mock ITX5061     | 0.9981  |
| Nsi Mock Simvastatin vs. Pool ADT ITX5061      | 0.766   |
| Nsi ADT Simvastatin vs. Pool Mock Simvastatin  | 0.9863  |
| Nsi ADT Simvastatin vs. Pool ADT Simvastatin   | >0.9999 |
| Nsi ADT Simvastatin vs. Nsi Mock ITX5061       | 0.2843  |
| Nsi ADT Simvastatin vs. Nsi ADT ITX5061        | >0.9999 |
| Nsi ADT Simvastatin vs. Pool Mock ITX5061      | 0.2548  |
| Nsi ADT Simvastatin vs. Pool ADT ITX5061       | >0.9999 |

|           |                            |                                                            |         |
|-----------|----------------------------|------------------------------------------------------------|---------|
|           |                            | Pool Mock Simvastatin vs. Pool ADT Simvastatin             | 0.9818  |
|           |                            | Pool Mock Simvastatin vs. Nsi Mock ITX5061                 | 0.9189  |
|           |                            | Pool Mock Simvastatin vs. Nsi ADT ITX5061                  | 0.9769  |
|           |                            | Pool Mock Simvastatin vs. Pool Mock ITX5061                | 0.8959  |
|           |                            | Pool Mock Simvastatin vs. Pool ADT ITX5061                 | 0.9838  |
|           |                            | Pool ADT Simvastatin vs. Nsi Mock ITX5061                  | 0.2642  |
|           |                            | Pool ADT Simvastatin vs. Nsi ADT ITX5061                   | >0.9999 |
|           |                            | Pool ADT Simvastatin vs. Pool Mock ITX5061                 | 0.2362  |
|           |                            | Pool ADT Simvastatin vs. Pool ADT ITX5061                  | >0.9999 |
|           |                            | Nsi Mock ITX5061 vs. Nsi ADT ITX5061                       | 0.247   |
|           |                            | Nsi Mock ITX5061 vs. Pool Mock ITX5061                     | >0.9999 |
|           |                            | Nsi Mock ITX5061 vs. Pool ADT ITX5061                      | 0.2725  |
|           |                            | Nsi ADT ITX5061 vs. Pool Mock ITX5061                      | 0.2203  |
|           |                            | Nsi ADT ITX5061 vs. Pool ADT ITX5061                       | >0.9999 |
|           |                            | Pool Mock ITX5061 vs. Pool ADT ITX5061                     | 0.2438  |
| Figure 6E | Unpaired t test Two-tailed | Nsi ADT Vehicle vs Nsi Mock Vehicle (Testosterone)         | 0.0075  |
|           |                            | Nsi ADT Simvastatin vs Nsi Mock Simvastatin (Testosterone) | <0.0001 |
|           |                            | Nsi ADT ITX5061 vs Nsi Mock ITX5061 (Testosterone)         | 0.0322  |
| Figure 6E | ANOVA Tukey's Test         | Nsi Mock Vehicle vs. Nsi ADT Vehicle                       | 0.931   |
|           |                            | Nsi Mock Vehicle vs. Pool Mock Vehicle                     | >0.9999 |
|           |                            | Nsi Mock Vehicle vs. Pool ADT Vehicle                      | 0.0303  |
|           |                            | Nsi Mock Vehicle vs. Nsi Mock Simvastatin                  | >0.9999 |
|           |                            | Nsi Mock Vehicle vs. Nsi ADT Simvastatin                   | 0.9389  |
|           |                            | Nsi Mock Vehicle vs. Pool Mock Simvastatin                 | >0.9999 |
|           |                            | Nsi Mock Vehicle vs. Pool ADT Simvastatin                  | 0.9371  |
|           |                            | Nsi Mock Vehicle vs. Nsi Mock ITX5061                      | >0.9999 |
|           |                            | Nsi Mock Vehicle vs. Nsi ADT ITX5061                       | 0.9272  |
|           |                            | Nsi Mock Vehicle vs. Pool Mock ITX5061                     | 0.9481  |
|           |                            | Nsi Mock Vehicle vs. Pool ADT ITX5061                      | 0.9404  |
|           |                            | Nsi ADT Vehicle vs. Pool Mock Vehicle                      | 0.9012  |
|           |                            | Nsi ADT Vehicle vs. Pool ADT Vehicle                       | 0.0009  |
|           |                            | Nsi ADT Vehicle vs. Nsi Mock Simvastatin                   | 0.9974  |
|           |                            | Nsi ADT Vehicle vs. Nsi ADT Simvastatin                    | >0.9999 |
|           |                            | Nsi ADT Vehicle vs. Pool Mock Simvastatin                  | 0.9905  |
|           |                            | Nsi ADT Vehicle vs. Pool ADT Simvastatin                   | >0.9999 |
|           |                            | Nsi ADT Vehicle vs. Nsi Mock ITX5061                       | 0.9872  |
|           |                            | Nsi ADT Vehicle vs. Nsi ADT ITX5061                        | >0.9999 |
|           |                            | Nsi ADT Vehicle vs. Pool Mock ITX5061                      | 0.2011  |
|           |                            | Nsi ADT Vehicle vs. Pool ADT ITX5061                       | >0.9999 |

|                                                |         |
|------------------------------------------------|---------|
| Pool Mock Vehicle vs. Pool ADT Vehicle         | 0.0372  |
| Pool Mock Vehicle vs. Nsi Mock Simvastatin     | >0.9999 |
| Pool Mock Vehicle vs. Nsi ADT Simvastatin      | 0.9113  |
| Pool Mock Vehicle vs. Pool Mock Simvastatin    | >0.9999 |
| Pool Mock Vehicle vs. Pool ADT Simvastatin     | 0.9089  |
| Pool Mock Vehicle vs. Nsi Mock ITX5061         | >0.9999 |
| Pool Mock Vehicle vs. Nsi ADT ITX5061          | 0.8966  |
| Pool Mock Vehicle vs. Pool Mock ITX5061        | 0.9669  |
| Pool Mock Vehicle vs. Pool ADT ITX5061         | 0.9131  |
| Pool ADT Vehicle vs. Nsi Mock Simvastatin      | 0.009   |
| Pool ADT Vehicle vs. Nsi ADT Simvastatin       | 0.001   |
| Pool ADT Vehicle vs. Pool Mock Simvastatin     | 0.0132  |
| Pool ADT Vehicle vs. Pool ADT Simvastatin      | 0.001   |
| Pool ADT Vehicle vs. Nsi Mock ITX5061          | 0.0146  |
| Pool ADT Vehicle vs. Nsi ADT ITX5061           | 0.0009  |
| Pool ADT Vehicle vs. Pool Mock ITX5061         | 0.4328  |
| Pool ADT Vehicle vs. Pool ADT ITX5061          | 0.001   |
| Nsi Mock Simvastatin vs. Nsi ADT Simvastatin   | 0.998   |
| Nsi Mock Simvastatin vs. Pool Mock Simvastatin | >0.9999 |
| Nsi Mock Simvastatin vs. Pool ADT Simvastatin  | 0.9979  |
| Nsi Mock Simvastatin vs. Nsi Mock ITX5061      | >0.9999 |
| Nsi Mock Simvastatin vs. Nsi ADT ITX5061       | 0.9971  |
| Nsi Mock Simvastatin vs. Pool Mock ITX5061     | 0.7212  |
| Nsi Mock Simvastatin vs. Pool ADT ITX5061      | 0.9981  |
| Nsi ADT Simvastatin vs. Pool Mock Simvastatin  | 0.9923  |
| Nsi ADT Simvastatin vs. Pool ADT Simvastatin   | >0.9999 |
| Nsi ADT Simvastatin vs. Nsi Mock ITX5061       | 0.9894  |
| Nsi ADT Simvastatin vs. Nsi ADT ITX5061        | >0.9999 |
| Nsi ADT Simvastatin vs. Pool Mock ITX5061      | 0.2117  |
| Nsi ADT Simvastatin vs. Pool ADT ITX5061       | >0.9999 |
| Pool Mock Simvastatin vs. Pool ADT Simvastatin | 0.9919  |
| Pool Mock Simvastatin vs. Nsi Mock ITX5061     | >0.9999 |
| Pool Mock Simvastatin vs. Nsi ADT ITX5061      | 0.9896  |
| Pool Mock Simvastatin vs. Pool Mock ITX5061    | 0.8113  |
| Pool Mock Simvastatin vs. Pool ADT ITX5061     | 0.9926  |
| Pool ADT Simvastatin vs. Nsi Mock ITX5061      | 0.9889  |
| Pool ADT Simvastatin vs. Nsi ADT ITX5061       | >0.9999 |
| Pool ADT Simvastatin vs. Pool Mock ITX5061     | 0.2091  |
| Pool ADT Simvastatin vs. Pool ADT ITX5061      | >0.9999 |
| Nsi Mock ITX5061 vs. Nsi ADT ITX5061           | 0.9861  |
| Nsi Mock ITX5061 vs. Pool Mock ITX5061         | 0.833   |
| Nsi Mock ITX5061 vs. Pool ADT ITX5061          | 0.9898  |



|             |                    |                                        |         |
|-------------|--------------------|----------------------------------------|---------|
|             |                    | Nsi ADT ITX5061 vs. Pool Mock ITX5061  | 0.1966  |
|             |                    | Nsi ADT ITX5061 vs. Pool ADT ITX5061   | >0.9999 |
|             |                    | Pool Mock ITX5061 vs. Pool ADT ITX5061 | 0.2137  |
| Figure 6F   | ANOVA Tukey's Test | Mock vs. ADT Vehicle                   | <0.0001 |
|             |                    | Mock vs. ADT ITX5061                   | <0.0001 |
|             |                    | ADT Vehicle vs. ADT ITX5061            | <0.0001 |
| Figure EV1G | ANOVA Sidak's test | Mock Vs ADT :-                         |         |
|             |                    | Nuclear Ki67                           | 0.815   |
|             |                    | Membrane p-AKT                         | 0.6301  |
|             |                    | p-ERK1/2                               | 0.2867  |
|             |                    | Nuclear AR                             | 0.0008  |
| Figure EV1H | ANOVA Sidak's test | Mock vs ADT:-                          |         |
|             |                    | WT                                     | 0.0014  |
|             |                    | Ptenfl/+                               | <0.0001 |
|             |                    | Spry2fl/+                              | 0.025   |
| Figure EV1J | ANOVA Tukey's Test | Membrane p-AKT                         |         |
|             |                    | WT Mock vs. WT ADT                     | 0.9972  |
|             |                    | Ptenfl/+ Mock vs. Ptenfl/+ ADT         | 0.0011  |
|             |                    | Spry2fl/+ Mock vs. Spry2fl/+ ADT       | 0.0537  |
|             |                    | p-ERK1/2                               |         |
|             |                    | WT Mock vs. WT ADT                     | 0.0274  |
|             |                    | Ptenfl/+ Mock vs. Ptenfl/+ ADT         | 0.0404  |
|             |                    | Spry2fl/+ Mock vs. Spry2fl/+ ADT       | 0.1318  |
|             |                    | Nuclear AR                             |         |
|             |                    | WT Mock vs. WT ADT                     | <0.0001 |
|             |                    | Ptenfl/+ Mock vs. Ptenfl/+ ADT         | <0.0001 |
|             |                    | Spry2fl/+ Mock vs. Spry2fl/+ ADT       | <0.0001 |
| Figure EV2B | ANOVA Sidak's test | AR                                     |         |
|             |                    | LNCaP vs. LNCaP AI                     | >0.9999 |
|             |                    | LNCaP vs. CWR22Res                     | 0.8356  |
|             |                    | LNCaP vs. CWR22RV1                     | 0.9581  |
|             |                    | LNCaP vs. VCaP                         | <0.0001 |
|             |                    | AR V7                                  |         |
|             |                    | LNCaP vs. LNCaP AI                     | >0.9999 |
|             |                    | LNCaP vs. CWR22Res                     | <0.0001 |
|             |                    | LNCaP vs. CWR22RV1                     | <0.0001 |
|             |                    | LNCaP vs. VCaP                         | <0.0001 |

|             |                            |                                       |         |
|-------------|----------------------------|---------------------------------------|---------|
| Figure EV2C | ANOVA Sidak's test         | CWR22Res FBS - CWR22Res CSS           |         |
|             |                            | 0                                     | >0.9999 |
|             |                            | 2                                     | <0.0001 |
|             |                            | 4                                     | <0.0001 |
|             |                            | CWR22RV1 FBS - CWR22RV1 CSS           |         |
|             |                            | 0                                     | >0.9999 |
| Figure EV2D | ANOVA Dunnett's test       | CWR Nsi vs. CWR CL3                   | 0.0001  |
|             |                            | CWR Nsi vs. CWR Pool                  | 0.0001  |
|             |                            | CWR22Res Mock - CWR22Res ADT          |         |
| Figure EV2E | ANOVA Sidak's test         | 0                                     | >0.9999 |
|             |                            | 30                                    | 0.9948  |
|             |                            | 60                                    | <0.0001 |
| Figure EV2F | Log-rank (Mantel-Cox) test | Comparison between ADT treated mice   | 0.0004  |
|             | Log-rank (Mantel-Cox) test | Comparison between Mock Vs ADT( Nsi)  | 0.0007  |
|             | Log-rank (Mantel-Cox) test | Comparison between Mock Vs ADT( CL3)  | 0.0044  |
|             | Log-rank (Mantel-Cox) test | Comparison between Mock Vs ADT( Pool) | 0.0064  |
| Figure EV2I | ANOVA Tukey's Test         | Nsi Mock vs. CL3 Mock                 | 0.8564  |
|             |                            | Nsi Mock vs. Pool Mock                | 0.9935  |
|             |                            | Nsi Mock vs. Nsi ADT                  | 0.0893  |
|             |                            | Nsi Mock vs. CL3 ADT                  | 0.0005  |
|             |                            | Nsi Mock vs. Pool ADT                 | <0.0001 |
|             |                            | CL3 Mock vs. Pool Mock                | 0.9899  |
|             |                            | CL3 Mock vs. Nsi ADT                  | 0.0068  |
|             |                            | CL3 Mock vs. CL3 ADT                  | 0.0077  |
|             |                            | CL3 Mock vs. Pool ADT                 | 0.0005  |
|             |                            | Pool Mock vs. Nsi ADT                 | 0.0276  |
|             |                            | Pool Mock vs. CL3 ADT                 | 0.0018  |
|             |                            | Pool Mock vs. Pool ADT                | 0.0001  |
|             |                            | Nsi ADT vs. CL3 ADT                   | <0.0001 |
|             |                            | Nsi ADT vs. Pool ADT                  | <0.0001 |
|             |                            | CL3 ADT vs. Pool ADT                  | 0.8682  |
| Figure EV2O | ANOVA Tukey's Test         | Nsi siCTRL vs. Pool siCTRL            | 0.0013  |
|             |                            | Nsi siCTRL vs. Nsi siPTEN             | 0.0475  |
|             |                            | Nsi siCTRL vs. Pool siPTEN            | 0.0004  |
|             |                            | Pool siCTRL vs. Nsi siPTEN            | 0.0821  |
|             |                            | Pool siCTRL vs. Pool siPTEN           | 0.6384  |

|             |                            |                                         |         |
|-------------|----------------------------|-----------------------------------------|---------|
|             |                            | Nsi siPTEN vs. Pool siPTEN              | 0.0154  |
| Figure EV3B | ANOVA Sidak's test         | Nuclear AR                              |         |
|             |                            | Nsi Mock vs. Nsi ADT                    | <0.0001 |
|             |                            | Nsi Mock vs. CL3 Mock                   | >0.9999 |
|             |                            | Nsi Mock vs. CL3 ADT                    | 0.0591  |
|             |                            | Nsi Mock vs. Pool Mock                  | 0.9994  |
|             |                            | Nsi Mock vs. Pool ADT                   | 0.174   |
|             |                            | Nsi ADT vs. CL3 Mock                    | <0.0001 |
|             |                            | Nsi ADT vs. CL3 ADT                     | <0.0001 |
|             |                            | Nsi ADT vs. Pool Mock                   | <0.0001 |
|             |                            | Nsi ADT vs. Pool ADT                    | <0.0001 |
|             |                            | CL3 Mock vs. CL3 ADT                    | 0.0139  |
|             |                            | CL3 Mock vs. Pool Mock                  | >0.9999 |
|             |                            | CL3 Mock vs. Pool ADT                   | 0.0453  |
|             |                            | CL3 ADT vs. Pool Mock                   | 0.0069  |
|             |                            | CL3 ADT vs. Pool ADT                    | >0.9999 |
|             |                            | Pool Mock vs. Pool ADT                  | 0.0229  |
|             |                            | Cleaved Caspase 3                       |         |
|             |                            | Nsi Mock vs. Nsi ADT                    | 0.0298  |
|             |                            | Nsi Mock vs. CL3 Mock                   | 0.4154  |
|             |                            | Nsi Mock vs. CL3 ADT                    | 0.0754  |
|             |                            | Nsi Mock vs. Pool Mock                  | 0.3632  |
|             |                            | Nsi Mock vs. Pool ADT                   | 0.2433  |
|             |                            | Nsi ADT vs. CL3 Mock                    | 0.0001  |
|             |                            | Nsi ADT vs. CL3 ADT                     | <0.0001 |
|             |                            | Nsi ADT vs. Pool Mock                   | <0.0001 |
|             |                            | Nsi ADT vs. Pool ADT                    | <0.0001 |
|             |                            | CL3 Mock vs. CL3 ADT                    | 0.9996  |
|             |                            | CL3 Mock vs. Pool Mock                  | >0.9999 |
|             |                            | CL3 Mock vs. Pool ADT                   | >0.9999 |
|             |                            | CL3 ADT vs. Pool Mock                   | 0.9999  |
|             |                            | CL3 ADT vs. Pool ADT                    | >0.9999 |
|             |                            | Pool Mock vs. Pool ADT                  | >0.9999 |
| Figure EV3C | Unpaired t test Two-tailed | CL3 vs Nsi (HSD3B1)                     | 0.0001  |
|             |                            | Pool vs Nsi (HSD3B1)                    | 0.0306  |
|             |                            | Pool vs Nsi (CYP17A1)                   | 0.0078  |
| Figure EV3I | ANOVA Tukey's Test         | 0 FBS                                   |         |
|             |                            | CTRL VC vs. CTRL 10 $\mu$ M Abiraterone | >0.9999 |
|             |                            | CTRL VC vs. CTRL 20 $\mu$ M Abiraterone | >0.9999 |
|             |                            | CTRL VC vs. SPRY2 VC                    | >0.9999 |

|                                                               |         |
|---------------------------------------------------------------|---------|
| CTRL VC vs. SPRY2 10 $\mu$ M Abiraterone                      | >0.9999 |
| CTRL VC vs. SPRY2 20 $\mu$ M Abiraterone                      | >0.9999 |
| CTRL 10 $\mu$ M Abiraterone vs. CTRL 20 $\mu$ M Abiraterone   | >0.9999 |
| CTRL 10 $\mu$ M Abiraterone vs. SPRY2 VC                      | >0.9999 |
| CTRL 10 $\mu$ M Abiraterone vs. SPRY2 $\mu$ M Abiraterone     | >0.9999 |
| CTRL 10 $\mu$ M Abiraterone vs. SPRY2 20 $\mu$ M Abiraterone  | >0.9999 |
| CTRL 20 $\mu$ M Abiraterone vs. SPRY2 VC                      | >0.9999 |
| CTRL 20 $\mu$ M Abiraterone vs. SPRY2 10 $\mu$ M Abiraterone  | >0.9999 |
| CTRL 20 $\mu$ M Abiraterone vs. SPRY2 20 $\mu$ M Abiraterone  | >0.9999 |
| SPRY2 VC vs. SPRY2 10 $\mu$ M Abiraterone                     | >0.9999 |
| SPRY2 VC vs. SPRY2 20 $\mu$ M Abiraterone                     | >0.9999 |
| SPRY2 10 $\mu$ M Abiraterone vs. SPRY2 20 $\mu$ M Abiraterone | >0.9999 |

#### 2 FBS

|                                                               |         |
|---------------------------------------------------------------|---------|
| CTRL VC vs. CTRL 10 $\mu$ M Abiraterone                       | <0.0001 |
| CTRL VC vs. CTRL 20 $\mu$ M Abiraterone                       | <0.0001 |
| CTRL VC vs. SPRY2 VC                                          | 0.0004  |
| CTRL VC vs. SPRY2 10 $\mu$ M Abiraterone                      | <0.0001 |
| CTRL VC vs. SPRY2 20 $\mu$ M Abiraterone                      | <0.0001 |
| CTRL 10 $\mu$ M Abiraterone vs. CTRL 20 $\mu$ M Abiraterone   | 0.4881  |
| CTRL 10 $\mu$ M Abiraterone vs. SPRY2 VC                      | 0.0001  |
| CTRL 10 $\mu$ M Abiraterone vs. SPRY2 $\mu$ M Abiraterone     | 0.9858  |
| CTRL 10 $\mu$ M Abiraterone vs. SPRY2 20 $\mu$ M Abiraterone  | 0.4973  |
| CTRL 20 $\mu$ M Abiraterone vs. SPRY2 VC                      | <0.0001 |
| CTRL 20 $\mu$ M Abiraterone vs. SPRY2 10 $\mu$ M Abiraterone  | 0.8656  |
| CTRL 20 $\mu$ M Abiraterone vs. SPRY2 20 $\mu$ M Abiraterone  | >0.9999 |
| SPRY2 VC vs. SPRY2 10 $\mu$ M Abiraterone                     | <0.0001 |
| SPRY2 VC vs. SPRY2 20 $\mu$ M Abiraterone                     | <0.0001 |
| SPRY2 10 $\mu$ M Abiraterone vs. SPRY2 20 $\mu$ M Abiraterone | 0.8719  |

#### 4 FBS

|                                                              |         |
|--------------------------------------------------------------|---------|
| CTRL VC vs. CTRL 10 $\mu$ M Abiraterone                      | <0.0001 |
| CTRL VC vs. CTRL 20 $\mu$ M Abiraterone                      | <0.0001 |
| CTRL VC vs. SPRY2 VC                                         | <0.0001 |
| CTRL VC vs. SPRY2 10 $\mu$ M Abiraterone                     | <0.0001 |
| CTRL VC vs. SPRY2 20 $\mu$ M Abiraterone                     | <0.0001 |
| CTRL 10 $\mu$ M Abiraterone vs. CTRL 20 $\mu$ M Abiraterone  | 0.0003  |
| CTRL 10 $\mu$ M Abiraterone vs. SPRY2 VC                     | <0.0001 |
| CTRL 10 $\mu$ M Abiraterone vs. SPRY2 $\mu$ M Abiraterone    | 0.7453  |
| CTRL 10 $\mu$ M Abiraterone vs. SPRY2 20 $\mu$ M Abiraterone | 0.0409  |
| CTRL 20 $\mu$ M Abiraterone vs. SPRY2 VC                     | <0.0001 |

|                                                               |         |
|---------------------------------------------------------------|---------|
| CTRL 20 $\mu$ M Abiraterone vs. SPRY2 10 $\mu$ M Abiraterone  | <0.0001 |
| CTRL 20 $\mu$ M Abiraterone vs. SPRY2 20 $\mu$ M Abiraterone  | 0.4699  |
| SPRY2 VC vs. SPRY2 10 $\mu$ M Abiraterone                     | <0.0001 |
| SPRY2 VC vs. SPRY2 20 $\mu$ M Abiraterone                     | <0.0001 |
| SPRY2 10 $\mu$ M Abiraterone vs. SPRY2 20 $\mu$ M Abiraterone | 0.001   |

#### 0 CSS

|                                                               |         |
|---------------------------------------------------------------|---------|
| CTRL VC vs. CTRL 10 $\mu$ M Abiraterone                       | >0.9999 |
| CTRL VC vs. CTRL 20 $\mu$ M Abiraterone                       | >0.9999 |
| CTRL VC vs. SPRY2 VC                                          | >0.9999 |
| CTRL VC vs. SPRY2 10 $\mu$ M Abiraterone                      | >0.9999 |
| CTRL VC vs. SPRY2 20 $\mu$ M Abiraterone                      | >0.9999 |
| CTRL 10 $\mu$ M Abiraterone vs. CTRL 20 $\mu$ M Abiraterone   | >0.9999 |
| CTRL 10 $\mu$ M Abiraterone vs. SPRY2 VC                      | >0.9999 |
| CTRL 10 $\mu$ M Abiraterone vs. SPRY2 $\mu$ M Abiraterone     | >0.9999 |
| CTRL 10 $\mu$ M Abiraterone vs. SPRY2 20 $\mu$ M Abiraterone  | >0.9999 |
| CTRL 20 $\mu$ M Abiraterone vs. SPRY2 VC                      | >0.9999 |
| CTRL 20 $\mu$ M Abiraterone vs. SPRY2 10 $\mu$ M Abiraterone  | >0.9999 |
| CTRL 20 $\mu$ M Abiraterone vs. SPRY2 20 $\mu$ M Abiraterone  | >0.9999 |
| SPRY2 VC vs. SPRY2 10 $\mu$ M Abiraterone                     | >0.9999 |
| SPRY2 VC vs. SPRY2 20 $\mu$ M Abiraterone                     | >0.9999 |
| SPRY2 10 $\mu$ M Abiraterone vs. SPRY2 20 $\mu$ M Abiraterone | >0.9999 |

#### 2 CSS

|                                                               |         |
|---------------------------------------------------------------|---------|
| CTRL VC vs. CTRL 10 $\mu$ M Abiraterone                       | <0.0001 |
| CTRL VC vs. CTRL 20 $\mu$ M Abiraterone                       | 0.2233  |
| CTRL VC vs. SPRY2 VC                                          | 0.282   |
| CTRL VC vs. SPRY2 10 $\mu$ M Abiraterone                      | 0.2878  |
| CTRL VC vs. SPRY2 20 $\mu$ M Abiraterone                      | 0.9389  |
| CTRL 10 $\mu$ M Abiraterone vs. CTRL 20 $\mu$ M Abiraterone   | <0.0001 |
| CTRL 10 $\mu$ M Abiraterone vs. SPRY2 VC                      | 0.0037  |
| CTRL 10 $\mu$ M Abiraterone vs. SPRY2 $\mu$ M Abiraterone     | <0.0001 |
| CTRL 10 $\mu$ M Abiraterone vs. SPRY2 20 $\mu$ M Abiraterone  | <0.0001 |
| CTRL 20 $\mu$ M Abiraterone vs. SPRY2 VC                      | 0.001   |
| CTRL 20 $\mu$ M Abiraterone vs. SPRY2 10 $\mu$ M Abiraterone  | >0.9999 |
| CTRL 20 $\mu$ M Abiraterone vs. SPRY2 20 $\mu$ M Abiraterone  | 0.0306  |
| SPRY2 VC vs. SPRY2 10 $\mu$ M Abiraterone                     | 0.0016  |
| SPRY2 VC vs. SPRY2 20 $\mu$ M Abiraterone                     | 0.8151  |
| SPRY2 10 $\mu$ M Abiraterone vs. SPRY2 20 $\mu$ M Abiraterone | 0.0437  |

| 4 CSS                                                         |         |
|---------------------------------------------------------------|---------|
| CTRL VC vs. CTRL 10 $\mu$ M Abiraterone                       | <0.0001 |
| CTRL VC vs. CTRL 20 $\mu$ M Abiraterone                       | <0.0001 |
| CTRL VC vs. SPRY2 VC                                          | 0.6308  |
| CTRL VC vs. SPRY2 10 $\mu$ M Abiraterone                      | <0.0001 |
| CTRL VC vs. SPRY2 20 $\mu$ M Abiraterone                      | 0.1299  |
| CTRL 10 $\mu$ M Abiraterone vs. CTRL 20 $\mu$ M Abiraterone   | <0.0001 |
| CTRL 10 $\mu$ M Abiraterone vs. SPRY2 VC                      | <0.0001 |
| CTRL 10 $\mu$ M Abiraterone vs. SPRY2 $\mu$ M Abiraterone     | <0.0001 |
| CTRL 10 $\mu$ M Abiraterone vs. SPRY2 20 $\mu$ M Abiraterone  | <0.0001 |
| CTRL 20 $\mu$ M Abiraterone vs. SPRY2 VC                      | <0.0001 |
| CTRL 20 $\mu$ M Abiraterone vs. SPRY2 10 $\mu$ M Abiraterone  | 0.8151  |
| CTRL 20 $\mu$ M Abiraterone vs. SPRY2 20 $\mu$ M Abiraterone  | <0.0001 |
| SPRY2 VC vs. SPRY2 10 $\mu$ M Abiraterone                     | <0.0001 |
| SPRY2 VC vs. SPRY2 20 $\mu$ M Abiraterone                     | 0.0026  |
| SPRY2 10 $\mu$ M Abiraterone vs. SPRY2 20 $\mu$ M Abiraterone | <0.0001 |

Figure EV3J ANOVA Tukey's Test

| FBS 0                                                                         |         |
|-------------------------------------------------------------------------------|---------|
| Nsi VC vs. Pool SPRY2 KD VC                                                   | >0.9999 |
| Nsi VC vs. Nsi 10 $\mu$ M Abiraterone                                         | >0.9999 |
| Nsi VC vs. Pool SPRY2 KD 10 $\mu$ M Abiraterone                               | >0.9999 |
| Nsi VC vs. Nsi 20 $\mu$ M Abiraterone                                         | >0.9999 |
| Nsi VC vs. Pool SPRY2 KD 20 $\mu$ M Abiraterone                               | >0.9999 |
| Pool SPRY2 KD VC vs. Nsi 10 $\mu$ M Abiraterone                               | >0.9999 |
| Pool SPRY2 KD VC vs. Pool SPRY2 KD 10 $\mu$ M Abiraterone                     | >0.9999 |
| Pool SPRY2 KD VC vs. Nsi 20 $\mu$ M Abiraterone                               | >0.9999 |
| Pool SPRY2 KD VC vs. Pool SPRY2 KD 20 $\mu$ M Abiraterone                     | >0.9999 |
| Nsi 10 $\mu$ M Abiraterone vs. Pool SPRY2 KD 10 $\mu$ M Abiraterone           | >0.9999 |
| Nsi 10 $\mu$ M Abiraterone vs. Nsi 20 $\mu$ M Abiraterone                     | >0.9999 |
| Nsi 10 $\mu$ M Abiraterone vs. Pool SPRY2 KD 20 $\mu$ M Abiraterone           | >0.9999 |
| Pool SPRY2 KD 10 $\mu$ M Abiraterone vs. Nsi 20 $\mu$ M Abiraterone           | >0.9999 |
| Pool SPRY2 KD 10 $\mu$ M Abiraterone vs. Pool SPRY2 KD 20 $\mu$ M Abiraterone | >0.9999 |
| Nsi 20 $\mu$ M Abiraterone vs. Pool SPRY2 KD 20 $\mu$ M Abiraterone           | >0.9999 |
| FBS 2                                                                         |         |
| Nsi VC vs. Pool SPRY2 KD VC                                                   | 0.7776  |
| Nsi VC vs. Nsi 10 $\mu$ M Abiraterone                                         | <0.0001 |
| Nsi VC vs. Pool SPRY2 KD 10 $\mu$ M Abiraterone                               | <0.0001 |
| Nsi VC vs. Nsi 20 $\mu$ M Abiraterone                                         | <0.0001 |
| Nsi VC vs. Pool SPRY2 KD 20 $\mu$ M Abiraterone                               | <0.0001 |
| Pool SPRY2 KD VC vs. Nsi 10 $\mu$ M Abiraterone                               | <0.0001 |

|                                                                               |         |
|-------------------------------------------------------------------------------|---------|
| Pool SPRY2 KD VC vs. Pool SPRY2 KD 10 $\mu$ M Abiraterone                     | <0.0001 |
| Pool SPRY2 KD VC vs. Nsi 20 $\mu$ M Abiraterone                               | <0.0001 |
| Pool SPRY2 KD VC vs. Pool SPRY2 KD 20 $\mu$ M Abiraterone                     | <0.0001 |
| Nsi 10 $\mu$ M Abiraterone vs. Pool SPRY2 KD 10 $\mu$ M Abiraterone           | <0.0001 |
| Nsi 10 $\mu$ M Abiraterone vs. Nsi 20 $\mu$ M Abiraterone                     | <0.0001 |
| Nsi 10 $\mu$ M Abiraterone vs. Pool SPRY2 KD 20 $\mu$ M Abiraterone           | <0.0001 |
| Pool SPRY2 KD 10 $\mu$ M Abiraterone vs. Nsi 20 $\mu$ M Abiraterone           | 0.9983  |
| Pool SPRY2 KD 10 $\mu$ M Abiraterone vs. Pool SPRY2 KD 20 $\mu$ M Abiraterone | 0.9966  |
| Nsi 20 $\mu$ M Abiraterone vs. Pool SPRY2 KD 20 $\mu$ M Abiraterone           | >0.9999 |
| FBS 4                                                                         |         |
| Nsi VC vs. Pool SPRY2 KD VC                                                   | 0.0112  |
| Nsi VC vs. Nsi 10 $\mu$ M Abiraterone                                         | <0.0001 |
| Nsi VC vs. Pool SPRY2 KD 10 $\mu$ M Abiraterone                               | <0.0001 |
| Nsi VC vs. Nsi 20 $\mu$ M Abiraterone                                         | <0.0001 |
| Nsi VC vs. Pool SPRY2 KD 20 $\mu$ M Abiraterone                               | <0.0001 |
| Pool SPRY2 KD VC vs. Nsi 10 $\mu$ M Abiraterone                               | <0.0001 |
| Pool SPRY2 KD VC vs. Pool SPRY2 KD 10 $\mu$ M Abiraterone                     | <0.0001 |
| Pool SPRY2 KD VC vs. Nsi 20 $\mu$ M Abiraterone                               | <0.0001 |
| Pool SPRY2 KD VC vs. Pool SPRY2 KD 20 $\mu$ M Abiraterone                     | <0.0001 |
| Nsi 10 $\mu$ M Abiraterone vs. Pool SPRY2 KD 10 $\mu$ M Abiraterone           | <0.0001 |
| Nsi 10 $\mu$ M Abiraterone vs. Nsi 20 $\mu$ M Abiraterone                     | <0.0001 |
| Nsi 10 $\mu$ M Abiraterone vs. Pool SPRY2 KD 20 $\mu$ M Abiraterone           | <0.0001 |
| Pool SPRY2 KD 10 $\mu$ M Abiraterone vs. Nsi 20 $\mu$ M Abiraterone           | 0.0074  |
| Pool SPRY2 KD 10 $\mu$ M Abiraterone vs. Pool SPRY2 KD 20 $\mu$ M Abiraterone | 0.0025  |
| Nsi 20 $\mu$ M Abiraterone vs. Pool SPRY2 KD 20 $\mu$ M Abiraterone           | 0.9987  |
| CSS 0                                                                         |         |
| Nsi VC vs. Pool SPRY2 KD VC                                                   | >0.9999 |
| Nsi VC vs. Nsi 10 $\mu$ M Abiraterone                                         | >0.9999 |
| Nsi VC vs. Pool SPRY2 KD 10 $\mu$ M Abiraterone                               | >0.9999 |
| Nsi VC vs. Nsi 20 $\mu$ M Abiraterone                                         | >0.9999 |
| Nsi VC vs. Pool SPRY2 KD 20 $\mu$ M Abiraterone                               | >0.9999 |
| Pool SPRY2 KD VC vs. Nsi 10 $\mu$ M Abiraterone                               | >0.9999 |
| Pool SPRY2 KD VC vs. Pool SPRY2 KD 10 $\mu$ M Abiraterone                     | >0.9999 |
| Pool SPRY2 KD VC vs. Nsi 20 $\mu$ M Abiraterone                               | >0.9999 |
| Pool SPRY2 KD VC vs. Pool SPRY2 KD 20 $\mu$ M Abiraterone                     | >0.9999 |
| Nsi 10 $\mu$ M Abiraterone vs. Pool SPRY2 KD 10 $\mu$ M Abiraterone           | >0.9999 |
| Nsi 10 $\mu$ M Abiraterone vs. Nsi 20 $\mu$ M Abiraterone                     | >0.9999 |
| Nsi 10 $\mu$ M Abiraterone vs. Pool SPRY2 KD 20 $\mu$ M Abiraterone           | >0.9999 |

Abiraterone

|                                                                               |         |
|-------------------------------------------------------------------------------|---------|
| Pool SPRY2 KD 10 $\mu$ M Abiraterone vs. Nsi 20 $\mu$ M Abiraterone           | >0.9999 |
| Pool SPRY2 KD 10 $\mu$ M Abiraterone vs. Pool SPRY2 KD 20 $\mu$ M Abiraterone | >0.9999 |
| Nsi 20 $\mu$ M Abiraterone vs. Pool SPRY2 KD 20 $\mu$ M Abiraterone           | >0.9999 |

CSS 2

|                                                                               |         |
|-------------------------------------------------------------------------------|---------|
| Nsi VC vs. Pool SPRY2 KD VC                                                   | <0.0001 |
| Nsi VC vs. Nsi 10 $\mu$ M Abiraterone                                         | 0.2233  |
| Nsi VC vs. Pool SPRY2 KD 10 $\mu$ M Abiraterone                               | 0.282   |
| Nsi VC vs. Nsi 20 $\mu$ M Abiraterone                                         | 0.2878  |
| Nsi VC vs. Pool SPRY2 KD 20 $\mu$ M Abiraterone                               | 0.9389  |
| Pool SPRY2 KD VC vs. Nsi 10 $\mu$ M Abiraterone                               | <0.0001 |
| Pool SPRY2 KD VC vs. Pool SPRY2 KD 10 $\mu$ M Abiraterone                     | 0.0037  |
| Pool SPRY2 KD VC vs. Nsi 20 $\mu$ M Abiraterone                               | <0.0001 |
| Pool SPRY2 KD VC vs. Pool SPRY2 KD 20 $\mu$ M Abiraterone                     | <0.0001 |
| Nsi 10 $\mu$ M Abiraterone vs. Pool SPRY2 KD 10 $\mu$ M Abiraterone           | 0.001   |
| Nsi 10 $\mu$ M Abiraterone vs. Nsi 20 $\mu$ M Abiraterone                     | >0.9999 |
| Nsi 10 $\mu$ M Abiraterone vs. Pool SPRY2 KD 20 $\mu$ M Abiraterone           | 0.0306  |
| Pool SPRY2 KD 10 $\mu$ M Abiraterone vs. Nsi 20 $\mu$ M Abiraterone           | 0.0016  |
| Pool SPRY2 KD 10 $\mu$ M Abiraterone vs. Pool SPRY2 KD 20 $\mu$ M Abiraterone | 0.8151  |
| Nsi 20 $\mu$ M Abiraterone vs. Pool SPRY2 KD 20 $\mu$ M Abiraterone           | 0.0437  |

CSS 4

|                                                                               |         |
|-------------------------------------------------------------------------------|---------|
| Nsi VC vs. Pool SPRY2 KD VC                                                   | <0.0001 |
| Nsi VC vs. Nsi 10 $\mu$ M Abiraterone                                         | <0.0001 |
| Nsi VC vs. Pool SPRY2 KD 10 $\mu$ M Abiraterone                               | 0.6308  |
| Nsi VC vs. Nsi 20 $\mu$ M Abiraterone                                         | <0.0001 |
| Nsi VC vs. Pool SPRY2 KD 20 $\mu$ M Abiraterone                               | 0.1299  |
| Pool SPRY2 KD VC vs. Nsi 10 $\mu$ M Abiraterone                               | <0.0001 |
| Pool SPRY2 KD VC vs. Pool SPRY2 KD 10 $\mu$ M Abiraterone                     | <0.0001 |
| Pool SPRY2 KD VC vs. Nsi 20 $\mu$ M Abiraterone                               | <0.0001 |
| Pool SPRY2 KD VC vs. Pool SPRY2 KD 20 $\mu$ M Abiraterone                     | <0.0001 |
| Nsi 10 $\mu$ M Abiraterone vs. Pool SPRY2 KD 10 $\mu$ M Abiraterone           | <0.0001 |
| Nsi 10 $\mu$ M Abiraterone vs. Nsi 20 $\mu$ M Abiraterone                     | 0.8151  |
| Nsi 10 $\mu$ M Abiraterone vs. Pool SPRY2 KD 20 $\mu$ M Abiraterone           | <0.0001 |
| Pool SPRY2 KD 10 $\mu$ M Abiraterone vs. Nsi 20 $\mu$ M Abiraterone           | <0.0001 |
| Pool SPRY2 KD 10 $\mu$ M Abiraterone vs. Pool SPRY2 KD 20 $\mu$ M Abiraterone | 0.0026  |
| Nsi 20 $\mu$ M Abiraterone vs. Pool SPRY2 KD 20 $\mu$ M Abiraterone           | <0.0001 |



|                                        |                            |                                        |         |
|----------------------------------------|----------------------------|----------------------------------------|---------|
| Figure EV3M                            | ANOVA Dunnett's test       | CWR Nsi FBS vs. CWR Pool FBS           | 0.6704  |
|                                        |                            | CWR Nsi FBS vs. CWR Nsi HSD3B1 KO FBS  | 0.9997  |
|                                        |                            | CWR Nsi FBS vs. CWR Pool HSD3B1 KO FBS | 0.9234  |
|                                        |                            | CWR Nsi FBS vs. CWR Nsi CSS            | 0.0021  |
|                                        |                            | CWR Nsi FBS vs. CWR Pool CSS           | 0.5651  |
|                                        |                            | CWR Nsi FBS vs. CWR Nsi HSD3B1 KO CSS  | 0.0011  |
|                                        |                            | CWR Nsi FBS vs. CWR Pool HSD3B1 KO CSS | 0.001   |
| Figure EV3O                            | Unpaired t test Two-tailed | Nsi shHER2 vs Nsi shSc                 | 0.0064  |
|                                        |                            | Pool shHER2 vs Pool shSc               | 0.0001  |
| Figure EV4B                            | Unpaired t test Two-tailed | CTRL vs SPRY2                          | 0.0498  |
| Figure EV4F                            | ANOVA Tukey's test         | LNCaP vs. CWR22Res                     | 0.1678  |
|                                        |                            | LNCaP vs. CWR22RV1                     | <0.0001 |
|                                        |                            | LNCaP vs. DU145                        | 0.0002  |
|                                        |                            | CWR22Res vs. CWR22RV1                  | 0.0002  |
|                                        |                            | CWR22Res vs. DU145                     | 0.0017  |
|                                        |                            | CWR22RV1 vs. DU145                     | 0.2321  |
| Figure EV4G                            | Unpaired t test Two-tailed | IL6 Vs CTRL                            | 0.0222  |
| Figure EV4H                            | Unpaired t test Two-tailed | anti-IL6 vs ctrl IgG (hIL6)            | 0.014   |
|                                        |                            | anti-IL6 vs ctrl IgG (HSD3B1)          | 0.0489  |
| Figure EV4K                            | ANOVA Tukey's test         | AR                                     |         |
|                                        |                            | Nsi Mock VC vs. Nsi ADT VC             | <0.0001 |
|                                        |                            | Nsi Mock VC vs. Pool Mock VC           | 0.987   |
|                                        |                            | Nsi Mock VC vs. Pool ADT VC            | 0.0954  |
|                                        |                            | Nsi Mock VC vs. Nsi Mock Tocilizumab   | >0.9999 |
|                                        |                            | Nsi Mock VC vs. Nsi ADT Tocilizumab    | <0.0001 |
|                                        |                            | Nsi Mock VC vs. Pool Mock Tocilizumab  | 0.2401  |
|                                        |                            | Nsi Mock VC vs. Pool ADT Tocilizumab   | <0.0001 |
|                                        |                            | Nsi ADT VC vs. Pool Mock VC            | <0.0001 |
|                                        |                            | Nsi ADT VC vs. Pool ADT VC             | <0.0001 |
|                                        |                            | Nsi ADT VC vs. Nsi Mock Tocilizumab    | <0.0001 |
|                                        |                            | Nsi ADT VC vs. Nsi ADT Tocilizumab     | 0.9987  |
|                                        |                            | Nsi ADT VC vs. Pool Mock Tocilizumab   | <0.0001 |
|                                        |                            | Nsi ADT VC vs. Pool ADT Tocilizumab    | 0.99    |
|                                        |                            | Pool Mock VC vs. Pool ADT VC           | 0.012   |
|                                        |                            | Pool Mock VC vs. Nsi Mock Tocilizumab  | 0.9746  |
|                                        |                            | Pool Mock VC vs. Nsi ADT Tocilizumab   | <0.0001 |
| Pool Mock VC vs. Pool Mock Tocilizumab | 0.0388                     |                                        |         |

|                                                |         |
|------------------------------------------------|---------|
| Pool Mock VC vs. Pool ADT Tocilizumab          | <0.0001 |
| Pool ADT VC vs. Nsi Mock Tocilizumab           | 0.12    |
| Pool ADT VC vs. Nsi ADT Tocilizumab            | <0.0001 |
| Pool ADT VC vs. Pool Mock Tocilizumab          | 0.9997  |
| Pool ADT VC vs. Pool ADT Tocilizumab           | <0.0001 |
| Nsi Mock Tocilizumab vs. Nsi ADT Tocilizumab   | <0.0001 |
| Nsi Mock Tocilizumab vs. Pool Mock Tocilizumab | 0.2894  |
| Nsi Mock Tocilizumab vs. Pool ADT Tocilizumab  | <0.0001 |
| Nsi ADT Tocilizumab vs. Pool Mock Tocilizumab  | <0.0001 |
| Nsi ADT Tocilizumab vs. Pool ADT Tocilizumab   | >0.9999 |
| Pool Mock Tocilizumab vs. Pool ADT Tocilizumab | <0.0001 |

Cleaved caspase 3

|                                                |         |
|------------------------------------------------|---------|
| Nsi Mock VC vs. Nsi ADT VC                     | 0.0001  |
| Nsi Mock VC vs. Pool Mock VC                   | >0.9999 |
| Nsi Mock VC vs. Pool ADT VC                    | >0.9999 |
| Nsi Mock VC vs. Nsi Mock Tocilizumab           | >0.9999 |
| Nsi Mock VC vs. Nsi ADT Tocilizumab            | 0.0002  |
| Nsi Mock VC vs. Pool Mock Tocilizumab          | 0.9894  |
| Nsi Mock VC vs. Pool ADT Tocilizumab           | <0.0001 |
| Nsi ADT VC vs. Pool Mock VC                    | 0.0003  |
| Nsi ADT VC vs. Pool ADT VC                     | 0.0001  |
| Nsi ADT VC vs. Nsi Mock Tocilizumab            | 0.0001  |
| Nsi ADT VC vs. Nsi ADT Tocilizumab             | >0.9999 |
| Nsi ADT VC vs. Pool Mock Tocilizumab           | 0.0013  |
| Nsi ADT VC vs. Pool ADT Tocilizumab            | >0.9999 |
| Pool Mock VC vs. Pool ADT VC                   | >0.9999 |
| Pool Mock VC vs. Nsi Mock Tocilizumab          | >0.9999 |
| Pool Mock VC vs. Nsi ADT Tocilizumab           | 0.0005  |
| Pool Mock VC vs. Pool Mock Tocilizumab         | 0.9994  |
| Pool Mock VC vs. Pool ADT Tocilizumab          | 0.0002  |
| Pool ADT VC vs. Nsi Mock Tocilizumab           | >0.9999 |
| Pool ADT VC vs. Nsi ADT Tocilizumab            | 0.0002  |
| Pool ADT VC vs. Pool Mock Tocilizumab          | 0.9903  |
| Pool ADT VC vs. Pool ADT Tocilizumab           | <0.0001 |
| Nsi Mock Tocilizumab vs. Nsi ADT Tocilizumab   | 0.0002  |
| Nsi Mock Tocilizumab vs. Pool Mock Tocilizumab | 0.9931  |
| Nsi Mock Tocilizumab vs. Pool ADT Tocilizumab  | 0.0001  |
| Nsi ADT Tocilizumab vs. Pool Mock Tocilizumab  | 0.002   |
| Nsi ADT Tocilizumab vs. Pool ADT Tocilizumab   | >0.9999 |
| Pool Mock Tocilizumab vs. Pool ADT Tocilizumab | 0.001   |

Figure EV4M Unpaired Two- tailed t test AR 0.000144008  
Cleaved Caspase 3 0.004478318

|             |                             | Ki67                                                    | 0.004986585 |
|-------------|-----------------------------|---------------------------------------------------------|-------------|
| Figure EV5G | Unpaired Two- tailed t test | 15µM ITX5061 vs DMSO                                    | 0.0145      |
| Figure EV5H | Unpaired Two- tailed t test | 15µM ITX5061 vs DMSO                                    | 0.0419      |
| Figure EV5I | Unpaired Two- tailed t test | 15µM ITX5061 vs DMSO                                    | 0.0493      |
| Figure EV5J | ANOVA Tukey's test          | Nsi Ctrl Vs Nsi SRB1 KO (DMSO)                          | 0.021327346 |
|             |                             | Nsi Ctrl Vs Pool Ctrl (ITX-5061)                        | 0.035819009 |
|             |                             | Nsi Ctrl Vs Pool Ctrl (DMSO)                            | 0.035819009 |
|             |                             | Nsi Ctrl Vs Pool SRB1 KO (ITX-5061)                     | 0.027102703 |
|             |                             | Nsi Ctrl Vs Pool SRB1 KO (DMSO)                         | 0.027102703 |
| Figure EV5K | ANOVA Tukey's test          | 0                                                       |             |
|             |                             | LNCaP-VC CTRL vs. LNCaP-SPRY2 VC                        | >0.9999     |
|             |                             | LNCaP-VC CTRL vs. LNCaP-VC 10µM ITX5061                 | >0.9999     |
|             |                             | LNCaP-VC CTRL vs. LNCaP-SPRY2 10 µM ITX5061             | >0.9999     |
|             |                             | LNCaP-VC CTRL vs. LNCaP-VC 15 µM ITX5061                | >0.9999     |
|             |                             | LNCaP-VC CTRL vs. LNCaP-SPRY2 15 µM ITX5061             | >0.9999     |
|             |                             | LNCaP-VC CTRL vs. LNCaP-VC 20 µM ITX5061                | >0.9999     |
|             |                             | LNCaP-VC CTRL vs. LNCaP-SPRY2 20 µM ITX5061             | >0.9999     |
|             |                             | LNCaP-SPRY2 VC vs. LNCaP-VC 10 µM ITX5061               | >0.9999     |
|             |                             | LNCaP-SPRY2 VC vs. LNCaP-SPRY2 10 µM ITX5061            | >0.9999     |
|             |                             | LNCaP-SPRY2 VC vs. LNCaP-VC 15 µM ITX5061               | >0.9999     |
|             |                             | LNCaP-SPRY2 VC vs. LNCaP-VC 20 µM ITX5061               | >0.9999     |
|             |                             | LNCaP-SPRY2 VC vs. LNCaP-SPRY2 20 µM ITX5061            | >0.9999     |
|             |                             | LNCaP-VC 10 µM ITX5061 vs. LNCaP-SPRY2 10 µM ITX5061    | >0.9999     |
|             |                             | LNCaP-VC 10 µM ITX5061 vs. LNCaP-VC 15 µM ITX5061       | >0.9999     |
|             |                             | LNCaP-VC 10 µM ITX5061 vs. LNCaP-SPRY2 15 µM ITX5061    | >0.9999     |
|             |                             | LNCaP-VC 10 µM ITX5061 vs. LNCaP-VC 20 µM ITX5061       | >0.9999     |
|             |                             | LNCaP-VC 10 µM ITX5061 vs. LNCaP-SPRY2 20 µM ITX5061    | >0.9999     |
|             |                             | LNCaP-SPRY2 10 µM ITX5061 vs. LNCaP-VC 15 µM ITX5061    | >0.9999     |
|             |                             | LNCaP-SPRY2 10 µM ITX5061 vs. LNCaP-SPRY2 15 µM ITX5061 | >0.9999     |
|             |                             | LNCaP-SPRY2 10 µM ITX5061 vs. LNCaP-VC 20 µM ITX5061    | >0.9999     |
|             |                             | LNCaP-SPRY2 10 µM ITX5061 vs. LNCaP-SPRY2 20 µM ITX5061 | >0.9999     |
|             |                             | LNCaP-VC 15 µM ITX5061 vs. LNCaP-SPRY2 15 µM ITX5061    | >0.9999     |
|             |                             | LNCaP-VC 15 µM ITX5061 vs. LNCaP-VC 20 µM ITX5061       | >0.9999     |

|                                                                   |         |
|-------------------------------------------------------------------|---------|
| LNCaP-VC 15 $\mu$ M ITX5061 vs. LNCaP-SPRY2 20 $\mu$ M ITX5061    | >0.9999 |
| LNCaP-SPRY2 15 $\mu$ M ITX5061 vs. LNCaP-VC 20 $\mu$ M ITX5061    | >0.9999 |
| LNCaP-SPRY2 15 $\mu$ M ITX5061 vs. LNCaP-SPRY2 20 $\mu$ M ITX5061 | >0.9999 |
| LNCaP-VC 20 $\mu$ M ITX5061 vs. LNCaP-SPRY2 20 $\mu$ M ITX5061    | >0.9999 |

2

|                                                                   |         |
|-------------------------------------------------------------------|---------|
| LNCaP-VC CTRL vs. LNCaP-SPRY2 VC                                  | <0.0001 |
| LNCaP-VC CTRL vs. LNCaP-VC 10 $\mu$ M ITX5061                     | <0.0001 |
| LNCaP-VC CTRL vs. LNCaP-SPRY2 10 $\mu$ M ITX5061                  | <0.0001 |
| LNCaP-VC CTRL vs. LNCaP-VC 15 $\mu$ M ITX5061                     | <0.0001 |
| LNCaP-VC CTRL vs. LNCaP-SPRY2 15 $\mu$ M ITX5061                  | <0.0001 |
| LNCaP-VC CTRL vs. LNCaP-VC 20 $\mu$ M ITX5061                     | <0.0001 |
| LNCaP-VC CTRL vs. LNCaP-SPRY2 20 $\mu$ M ITX5061                  | <0.0001 |
| LNCaP-SPRY2 VC vs. LNCaP-VC 10 $\mu$ M ITX5061                    | 0.1117  |
| LNCaP-SPRY2 VC vs. LNCaP-SPRY2 10 $\mu$ M ITX5061                 | 0.0011  |
| LNCaP-SPRY2 VC vs. LNCaP-VC 15 $\mu$ M ITX5061                    | 0.0007  |
| LNCaP-SPRY2 VC vs. LNCaP-VC 20 $\mu$ M ITX5061                    | <0.0001 |
| LNCaP-SPRY2 VC vs. LNCaP-SPRY2 20 $\mu$ M ITX5061                 | <0.0001 |
| LNCaP-VC 10 $\mu$ M ITX5061 vs. LNCaP-SPRY2 10 $\mu$ M ITX5061    | <0.0001 |
| LNCaP-VC 10 $\mu$ M ITX5061 vs. LNCaP-VC 15 $\mu$ M ITX5061       | 0.713   |
| LNCaP-VC 10 $\mu$ M ITX5061 vs. LNCaP-SPRY2 15 $\mu$ M ITX5061    | 0.6137  |
| LNCaP-VC 10 $\mu$ M ITX5061 vs. LNCaP-VC 20 $\mu$ M ITX5061       | 0.0192  |
| LNCaP-VC 10 $\mu$ M ITX5061 vs. LNCaP-SPRY2 20 $\mu$ M ITX5061    | 0.2649  |
| LNCaP-SPRY2 10 $\mu$ M ITX5061 vs. LNCaP-VC 15 $\mu$ M ITX5061    | <0.0001 |
| LNCaP-SPRY2 10 $\mu$ M ITX5061 vs. LNCaP-SPRY2 15 $\mu$ M ITX5061 | >0.9999 |
| LNCaP-SPRY2 10 $\mu$ M ITX5061 vs. LNCaP-VC 20 $\mu$ M ITX5061    | 0.5754  |
| LNCaP-SPRY2 10 $\mu$ M ITX5061 vs. LNCaP-SPRY2 20 $\mu$ M ITX5061 | 0.9952  |
| LNCaP-VC 15 $\mu$ M ITX5061 vs. LNCaP-SPRY2 15 $\mu$ M ITX5061    | 0.0117  |
| LNCaP-VC 15 $\mu$ M ITX5061 vs. LNCaP-VC 20 $\mu$ M ITX5061       | 0.6766  |
| LNCaP-VC 15 $\mu$ M ITX5061 vs. LNCaP-SPRY2 20 $\mu$ M ITX5061    | 0.9989  |
| LNCaP-SPRY2 15 $\mu$ M ITX5061 vs. LNCaP-VC 20 $\mu$ M ITX5061    | 0.0182  |
| LNCaP-SPRY2 15 $\mu$ M ITX5061 vs. LNCaP-SPRY2 20 $\mu$ M ITX5061 | 0.9464  |
| LNCaP-VC 20 $\mu$ M ITX5061 vs. LNCaP-SPRY2 20 $\mu$ M ITX5061    | 0.601   |

4

|                                  |         |
|----------------------------------|---------|
| LNCaP-VC CTRL vs. LNCaP-SPRY2 VC | <0.0001 |
|----------------------------------|---------|

|                                                         |         |
|---------------------------------------------------------|---------|
| LNCaP-VC CTRL vs. LNCaP-VC 10µM ITX5061                 | <0.0001 |
| LNCaP-VC CTRL vs. LNCaP-SPRY2 10 µM ITX5061             | <0.0001 |
| LNCaP-VC CTRL vs. LNCaP-VC 15 µM ITX5061                | <0.0001 |
| LNCaP-VC CTRL vs. LNCaP-SPRY2 15 µM ITX5061             | <0.0001 |
| LNCaP-VC CTRL vs. LNCaP-VC 20 µM ITX5061                | <0.0001 |
| LNCaP-VC CTRL vs. LNCaP-SPRY2 20 µM ITX5061             | <0.0001 |
| LNCaP-SPRY2 VC vs. LNCaP-VC 10 µM ITX5061               | <0.0001 |
| LNCaP-SPRY2 VC vs. LNCaP-SPRY2 10 µM ITX5061            | <0.0001 |
| LNCaP-SPRY2 VC vs. LNCaP-VC 15 µM ITX5061               | <0.0001 |
| LNCaP-SPRY2 VC vs. LNCaP-VC 20 µM ITX5061               | <0.0001 |
| LNCaP-SPRY2 VC vs. LNCaP-SPRY2 20 µM ITX5061            | <0.0001 |
| LNCaP-VC 10 µM ITX5061 vs. LNCaP-SPRY2 10 µM ITX5061    | <0.0001 |
| LNCaP-VC 10 µM ITX5061 vs. LNCaP-VC 15 µM ITX5061       | 0.9667  |
| LNCaP-VC 10 µM ITX5061 vs. LNCaP-SPRY2 15 µM ITX5061    | 0.1117  |
| LNCaP-VC 10 µM ITX5061 vs. LNCaP-VC 20 µM ITX5061       | 0.0004  |
| LNCaP-VC 10 µM ITX5061 vs. LNCaP-SPRY2 20 µM ITX5061    | <0.0001 |
| LNCaP-SPRY2 10 µM ITX5061 vs. LNCaP-VC 15 µM ITX5061    | <0.0001 |
| LNCaP-SPRY2 10 µM ITX5061 vs. LNCaP-SPRY2 15 µM ITX5061 | 0.6264  |
| LNCaP-SPRY2 10 µM ITX5061 vs. LNCaP-VC 20 µM ITX5061    | 0.0105  |
| LNCaP-SPRY2 10 µM ITX5061 vs. LNCaP-SPRY2 20 µM ITX5061 | <0.0001 |
| LNCaP-VC 15 µM ITX5061 vs. LNCaP-SPRY2 15 µM ITX5061    | <0.0001 |
| LNCaP-VC 15 µM ITX5061 vs. LNCaP-VC 20 µM ITX5061       | 0.5243  |
| LNCaP-VC 15 µM ITX5061 vs. LNCaP-SPRY2 20 µM ITX5061    | 0.0155  |
| LNCaP-SPRY2 15 µM ITX5061 vs. LNCaP-VC 20 µM ITX5061    | <0.0001 |
| LNCaP-SPRY2 15 µM ITX5061 vs. LNCaP-SPRY2 20 µM ITX5061 | 0.713   |
| LNCaP-VC 20 µM ITX5061 vs. LNCaP-SPRY2 20 µM ITX5061    | 0.0007  |

Figure EV5L ANOVA Tukey's test

|                               |         |
|-------------------------------|---------|
| 0                             |         |
| VC vs. 10µM ITX5061           | >0.9999 |
| VC vs. 15µM ITX5061           | >0.9999 |
| VC vs. 20µM ITX5061           | >0.9999 |
| 10µM ITX5061 vs. 15µM ITX5061 | >0.9999 |
| 10µM ITX5061 vs. 20µM ITX5061 | >0.9999 |
| 15µM ITX5061 vs. 20µM ITX5061 | >0.9999 |
| 2                             |         |
| VC vs. 10µM ITX5061           | 0.0786  |
| VC vs. 15µM ITX5061           | <0.0001 |

|                        |                             |                                              |             |
|------------------------|-----------------------------|----------------------------------------------|-------------|
|                        |                             | VC vs. 20µM ITX5061                          | <0.0001     |
|                        |                             | 10µM ITX5061 vs. 15µM ITX5061                | 0.0153      |
|                        |                             | 10µM ITX5061 vs. 20µM ITX5061                | 0.0006      |
|                        |                             | 15µM ITX5061 vs. 20µM ITX5061                | 0.5623      |
|                        |                             | 4                                            |             |
|                        |                             | VC vs. 10µM ITX5061                          | <0.0001     |
|                        |                             | VC vs. 15µM ITX5061                          | <0.0001     |
|                        |                             | VC vs. 20µM ITX5061                          | <0.0001     |
|                        |                             | 10µM ITX5061 vs. 15µM ITX5061                | 0.0017      |
|                        |                             | 10µM ITX5061 vs. 20µM ITX5061                | <0.0001     |
|                        |                             | 15µM ITX5061 vs. 20µM ITX5061                | 0.0006      |
| Figure EV5N            | Unpaired Two- tailed t test | Nsi Mock Vehicle Vs Nsi ADT Vehicle:         |             |
|                        |                             | Nuclear AR                                   | 0.00014056  |
|                        |                             | Cleaved Capase 3                             | 0.00609197  |
|                        |                             | Nsi Mock ITX5061 Vs Nsi ADT ITX5061:         |             |
|                        |                             | Nuclear AR                                   | 0.00014244  |
|                        |                             | Cleaved Capase 3                             | 0.007401964 |
|                        |                             | Pool Mock ITX5061 Vs Pool ADT ITX5061 :      |             |
|                        |                             | Nuclear AR                                   | 0.000237895 |
|                        |                             | Cleaved Capase 3                             | 0.002315735 |
| Appendix<br>Figure S1E | Unpaired Two- tailed t test | Proximal<br>Mets                             | 0.001184277 |
|                        |                             | Distal mets<br>(Thoracic Mets)               | 0.007256289 |
|                        |                             | Distal mets<br>(Lungs)                       | 0.008962484 |
| Appendix<br>Figure S2A | ANOVA Tukey's test          | Nsi Mock vs. Pool (SPRY2 KD) Mock            | 0.3753      |
|                        |                             | Nsi Mock vs. Nsi ADT                         | 0.0036      |
|                        |                             | Nsi Mock vs. Pool (SPRY2 KD) ADT             | 0.001       |
|                        |                             | Pool (SPRY2 KD) Mock vs. Nsi ADT             | 0.0329      |
|                        |                             | Pool (SPRY2 KD) Mock vs. Pool (SPRY2 KD) ADT | 0.0077      |
|                        |                             | Nsi ADT vs. Pool (SPRY2 KD) ADT              | 0.7078      |
| Appendix<br>Figure S2C | ANOVA Tukey's test          | Nsi Mock vs. Nsi ADT                         | 0.9747      |
|                        |                             | Nsi Mock vs. Pool Mock                       | >0.9999     |
|                        |                             | Nsi Mock vs. Pool ADT                        | 0.0074      |
|                        |                             | Nsi ADT vs. Pool Mock                        | 0.9802      |
|                        |                             | Nsi ADT vs. Pool ADT                         | 0.0125      |

|                        |                             |                                         |         |
|------------------------|-----------------------------|-----------------------------------------|---------|
|                        |                             | Pool Mock vs. Pool ADT                  | 0.0077  |
| Appendix<br>Figure S2D | Unpaired Two- tailed t test | IL6 vs Ctrl                             | 0.0287  |
| Appendix<br>Figure S2E | Unpaired Two- tailed t test | ADT Vs Mock                             | <0.0001 |
| Appendix<br>Figure S2K | ANOVA Tukey's test          | Liver tumour vs. Normal                 | 0.0073  |
|                        |                             | Liver tumour vs. ADT                    | 0.0234  |
|                        |                             | Liver tumour vs. Nsi VC                 | 0.0137  |
|                        |                             | Liver tumour vs. Nsi + ITX5061          | 0.028   |
|                        |                             | Liver tumour vs. Nsi Simvastatin        | 0.0039  |
|                        |                             | Liver tumour vs. Nsi ADT                | 0.0198  |
|                        |                             | Liver tumour vs. Nsi ADT + ITX5061      | 0.016   |
|                        |                             | Liver tumour vs. Nsi ADT + Simvastatin  | 0.0031  |
|                        |                             | Liver tumour vs. Pool                   | 0.0141  |
|                        |                             | Liver tumour vs. Pool ITX5061           | 0.0076  |
|                        |                             | Liver tumour vs. Pool Simvastatin       | 0.0129  |
|                        |                             | Liver tumour vs. Pool ADT               | >0.9999 |
|                        |                             | Liver tumour vs. Pool ADT + ITX5061     | 0.0027  |
|                        |                             | Liver tumour vs. Pool ADT + Simvastatin | 0.2344  |
|                        |                             | Normal vs. ADT                          | >0.9999 |
|                        |                             | Normal vs. Nsi VC                       | >0.9999 |
|                        |                             | Normal vs. Nsi + ITX5061                | 0.9995  |
|                        |                             | Normal vs. Nsi Simvastatin              | >0.9999 |
|                        |                             | Normal vs. Nsi ADT                      | >0.9999 |
|                        |                             | Normal vs. Nsi ADT + ITX5061            | >0.9999 |
|                        |                             | Normal vs. Nsi ADT + Simvastatin        | >0.9999 |
|                        |                             | Normal vs. Pool                         | >0.9999 |
|                        |                             | Normal vs. Pool ITX5061                 | >0.9999 |
|                        |                             | Normal vs. Pool Simvastatin             | >0.9999 |
|                        |                             | Normal vs. Pool ADT                     | 0.005   |
|                        |                             | Normal vs. Pool ADT + ITX5061           | >0.9999 |
|                        |                             | Normal vs. Pool ADT + Simvastatin       | 0.8098  |
|                        |                             | ADT vs. Nsi VC                          | >0.9999 |
|                        |                             | ADT vs. Nsi + ITX5061                   | >0.9999 |
|                        |                             | ADT vs. Nsi Simvastatin                 | >0.9999 |
|                        |                             | ADT vs. Nsi ADT                         | >0.9999 |
|                        |                             | ADT vs. Nsi ADT + ITX5061               | >0.9999 |
|                        |                             | ADT vs. Nsi ADT + Simvastatin           | >0.9999 |
|                        |                             | ADT vs. Pool                            | >0.9999 |
|                        |                             | ADT vs. Pool ITX5061                    | >0.9999 |
|                        |                             | ADT vs. Pool Simvastatin                | >0.9999 |

|                                             |         |
|---------------------------------------------|---------|
| ADT vs. Pool ADT                            | 0.0183  |
| ADT vs. Pool ADT + ITX5061                  | >0.9999 |
| ADT vs. Pool ADT + Simvastatin              | 0.9752  |
| Nsi VC vs. Nsi + ITX5061                    | >0.9999 |
| Nsi VC vs. Nsi Simvastatin                  | >0.9999 |
| Nsi VC vs. Nsi ADT                          | >0.9999 |
| Nsi VC vs. Nsi ADT + ITX5061                | >0.9999 |
| Nsi VC vs. Nsi ADT + Simvastatin            | >0.9999 |
| Nsi VC vs. Pool                             | >0.9999 |
| Nsi VC vs. Pool ITX5061                     | >0.9999 |
| Nsi VC vs. Pool Simvastatin                 | >0.9999 |
| Nsi VC vs. Pool ADT                         | 0.0086  |
| Nsi VC vs. Pool ADT + ITX5061               | >0.9999 |
| Nsi VC vs. Pool ADT + Simvastatin           | 0.9771  |
| Nsi + ITX5061 vs. Nsi Simvastatin           | >0.9999 |
| Nsi + ITX5061 vs. Nsi ADT                   | >0.9999 |
| Nsi + ITX5061 vs. Nsi ADT + ITX5061         | >0.9999 |
| Nsi + ITX5061 vs. Nsi ADT + Simvastatin     | 0.9995  |
| Nsi + ITX5061 vs. Pool                      | >0.9999 |
| Nsi + ITX5061 vs. Pool ITX5061              | >0.9999 |
| Nsi + ITX5061 vs. Pool Simvastatin          | >0.9999 |
| Nsi + ITX5061 vs. Pool ADT                  | 0.0195  |
| Nsi + ITX5061 vs. Pool ADT + ITX5061        | >0.9999 |
| Nsi + ITX5061 vs. Pool ADT + Simvastatin    | 0.9979  |
| Nsi Simvastatin vs. Nsi ADT                 | >0.9999 |
| Nsi Simvastatin vs. Nsi ADT + ITX5061       | >0.9999 |
| Nsi Simvastatin vs. Nsi ADT + Simvastatin   | >0.9999 |
| Nsi Simvastatin vs. Pool                    | >0.9999 |
| Nsi Simvastatin vs. Pool ITX5061            | >0.9999 |
| Nsi Simvastatin vs. Pool Simvastatin        | >0.9999 |
| Nsi Simvastatin vs. Pool ADT                | 0.0018  |
| Nsi Simvastatin vs. Pool ADT + ITX5061      | >0.9999 |
| Nsi Simvastatin vs. Pool ADT + Simvastatin  | 0.8697  |
| Nsi ADT vs. Nsi ADT + ITX5061               | >0.9999 |
| Nsi ADT vs. Nsi ADT + Simvastatin           | >0.9999 |
| Nsi ADT vs. Pool                            | >0.9999 |
| Nsi ADT vs. Pool ITX5061                    | >0.9999 |
| Nsi ADT vs. Pool Simvastatin                | >0.9999 |
| Nsi ADT vs. Pool ADT                        | 0.0131  |
| Nsi ADT vs. Pool ADT + ITX5061              | >0.9999 |
| Nsi ADT vs. Pool ADT + Simvastatin          | 0.9922  |
| Nsi ADT + ITX5061 vs. Nsi ADT + Simvastatin | >0.9999 |
| Nsi ADT + ITX5061 vs. Pool                  | >0.9999 |
| Nsi ADT + ITX5061 vs. Pool ITX5061          | >0.9999 |



|                                                  |         |
|--------------------------------------------------|---------|
| Nsi ADT + ITX5061 vs. Pool Simvastatin           | >0.9999 |
| Nsi ADT + ITX5061 vs. Pool ADT                   | 0.0103  |
| Nsi ADT + ITX5061 vs. Pool ADT + ITX5061         | >0.9999 |
| Nsi ADT + ITX5061 vs. Pool ADT + Simvastatin     | 0.9852  |
| Nsi ADT + Simvastatin vs. Pool                   | >0.9999 |
| Nsi ADT + Simvastatin vs. Pool ITX5061           | >0.9999 |
| Nsi ADT + Simvastatin vs. Pool Simvastatin       | >0.9999 |
| Nsi ADT + Simvastatin vs. Pool ADT               | 0.0016  |
| Nsi ADT + Simvastatin vs. Pool ADT + ITX5061     | >0.9999 |
| Nsi ADT + Simvastatin vs. Pool ADT + Simvastatin | 0.7434  |
| Pool vs. Pool ITX5061                            | >0.9999 |
| Pool vs. Pool Simvastatin                        | >0.9999 |
| Pool vs. Pool ADT                                | 0.0089  |
| Pool vs. Pool ADT + ITX5061                      | >0.9999 |
| Pool vs. Pool ADT + Simvastatin                  | 0.9791  |
| Pool ITX5061 vs. Pool Simvastatin                | >0.9999 |
| Pool ITX5061 vs. Pool ADT                        | 0.0044  |
| Pool ITX5061 vs. Pool ADT + ITX5061              | >0.9999 |
| Pool ITX5061 vs. Pool ADT + Simvastatin          | 0.9217  |
| Pool Simvastatin vs. Pool ADT                    | 0.0081  |
| Pool Simvastatin vs. Pool ADT + ITX5061          | >0.9999 |
| Pool Simvastatin vs. Pool ADT + Simvastatin      | 0.9737  |
| Pool ADT vs. Pool ADT + ITX5061                  | 0.001   |
| Pool ADT vs. Pool ADT + Simvastatin              | 0.2213  |
| Pool ADT + ITX5061 vs. Pool ADT + Simvastatin    | 0.847   |

Appendix  
Figure S2L

ANOVA Tukey's test

|                                      |        |
|--------------------------------------|--------|
| Mock vs. 48 hrs post-ADT             | 0.0784 |
| Mock vs. 4 weeks post-ADT            | 0.0005 |
| 48 hrs post-ADT vs. 4 weeks post-ADT | 0.0048 |

Appendix  
Figure S2N

ANOVA Tukey's test

|                                                |         |
|------------------------------------------------|---------|
| Nuclear AR                                     |         |
| Nsi Mock Vehicle vs. Nsi Mock Simvastatin      | >0.9999 |
| Nsi Mock Vehicle vs. Nsi ADT Vehicle           | <0.0001 |
| Nsi Mock Vehicle vs. Nsi ADT Simvastatin       | <0.0001 |
| Nsi Mock Vehicle vs. Pool Mock Vehicle         | 0.9997  |
| Nsi Mock Vehicle vs. Pool Mock Simvastatin     | 0.0061  |
| Nsi Mock Vehicle vs. Pool ADT Vehicle          | 0.6911  |
| Nsi Mock Vehicle vs. Pool ADT Simvastatin      | <0.0001 |
| Nsi Mock Simvastatin vs. Nsi ADT Vehicle       | <0.0001 |
| Nsi Mock Simvastatin vs. Nsi ADT Simvastatin   | <0.0001 |
| Nsi Mock Simvastatin vs. Pool Mock Vehicle     | 0.999   |
| Nsi Mock Simvastatin vs. Pool Mock Simvastatin | 0.0078  |
| Nsi Mock Simvastatin vs. Pool ADT Vehicle      | 0.7475  |

|                                                 |         |
|-------------------------------------------------|---------|
| Nsi Mock Simvastatin vs. Pool ADT Simvastatin   | <0.0001 |
| Nsi ADT Vehicle vs. Nsi ADT Simvastatin         | 0.9702  |
| Nsi ADT Vehicle vs. Pool Mock Vehicle           | <0.0001 |
| Nsi ADT Vehicle vs. Pool Mock Simvastation      | <0.0001 |
| Nsi ADT Vehicle vs. Pool ADT Vehicle            | <0.0001 |
| Nsi ADT Vehicle vs. Pool ADT Simvastatin        | 0.9996  |
| Nsi ADT Simvastatin vs. Pool Mock Vehicle       | <0.0001 |
| Nsi ADT Simvastatin vs. Pool Mock Simvastation  | <0.0001 |
| Nsi ADT Simvastatin vs. Pool ADT Vehicle        | <0.0001 |
| Nsi ADT Simvastatin vs. Pool ADT Simvastatin    | 0.9995  |
| Pool Mock Vehicle vs. Pool Mock Simvastation    | 0.0017  |
| Pool Mock Vehicle vs. Pool ADT Vehicle          | 0.3967  |
| Pool Mock Vehicle vs. Pool ADT Simvastatin      | <0.0001 |
| Pool Mock Simvastation vs. Pool ADT Vehicle     | 0.2835  |
| Pool Mock Simvastation vs. Pool ADT Simvastatin | <0.0001 |
| Pool ADT Vehicle vs. Pool ADT Simvastatin       | <0.0001 |

Cleaved Capase 3

|                                                 |         |
|-------------------------------------------------|---------|
| Nsi Mock Vehicle vs. Nsi Mock Simvastatin       | 0.9393  |
| Nsi Mock Vehicle vs. Nsi ADT Vehicle            | <0.0001 |
| Nsi Mock Vehicle vs. Nsi ADT Simvastatin        | <0.0001 |
| Nsi Mock Vehicle vs. Pool Mock Vehicle          | 0.9998  |
| Nsi Mock Vehicle vs. Pool Mock Simvastation     | 0.4755  |
| Nsi Mock Vehicle vs. Pool ADT Vehicle           | 0.9889  |
| Nsi Mock Vehicle vs. Pool ADT Simvastatin       | <0.0001 |
| Nsi Mock Simvastatin vs. Nsi ADT Vehicle        | <0.0001 |
| Nsi Mock Simvastatin vs. Nsi ADT Simvastatin    | <0.0001 |
| Nsi Mock Simvastatin vs. Pool Mock Vehicle      | 0.7405  |
| Nsi Mock Simvastatin vs. Pool Mock Simvastation | 0.0562  |
| Nsi Mock Simvastatin vs. Pool ADT Vehicle       | >0.9999 |
| Nsi Mock Simvastatin vs. Pool ADT Simvastatin   | <0.0001 |
| Nsi ADT Vehicle vs. Nsi ADT Simvastatin         | 0.3702  |
| Nsi ADT Vehicle vs. Pool Mock Vehicle           | <0.0001 |
| Nsi ADT Vehicle vs. Pool Mock Simvastation      | 0.007   |
| Nsi ADT Vehicle vs. Pool ADT Vehicle            | <0.0001 |
| Nsi ADT Vehicle vs. Pool ADT Simvastatin        | >0.9999 |
| Nsi ADT Simvastatin vs. Pool Mock Vehicle       | <0.0001 |
| Nsi ADT Simvastatin vs. Pool Mock Simvastation  | <0.0001 |
| Nsi ADT Simvastatin vs. Pool ADT Vehicle        | <0.0001 |
| Nsi ADT Simvastatin vs. Pool ADT Simvastatin    | 0.4977  |
| Pool Mock Vehicle vs. Pool Mock Simvastation    | 0.7597  |
| Pool Mock Vehicle vs. Pool ADT Vehicle          | 0.8914  |
| Pool Mock Vehicle vs. Pool ADT Simvastatin      | <0.0001 |
| Pool Mock Simvastation vs. Pool ADT Vehicle     | 0.1108  |

|                                                 |         |
|-------------------------------------------------|---------|
| Pool Mock Simvastation vs. Pool ADT Simvastatin | 0.0039  |
| Pool ADT Vehicle vs. Pool ADT Simvastatin       | <0.0001 |
