# Supplementary material for: Sprouty2 loss‐induced IL6 drives castration‐resistant prostate cancer through scavenger receptor B1
Source: PubMed Central journal article supplement (PMC5887544; doi:10.15252/emmm.201708347), 2018-03-14
Supplement: EMMM-10-e8347-s002.pdf [file EMMM-10-e8347-s002.pdf]

## Expanded View Figures

### Figure EV1. SPRY2 deficiency mediates CRPC.

- A Kaplan–Meier plot for relapse-free survival in TCGA prostate cancer 2015 dataset showing cases with low SPRY2 mRNA expression z-scores (RNA seq V2 RSEM) ( $EXP < -1.3$ )  $n = 48$  and rest of the cases with higher SPRY2 expression ( $n = 443$ ); log-rank (Mantel–Cox) test;  $P = 0.034$ .
- B Immunostaining for PTEN in HN and CRPC matched clinical prostate cancer sections represented as IHC (immunohistochemistry) scores.
- C Scatter plot showing correlation of PTEN and SPRY2 IHC scores in CRPC samples.
- D Kaplan–Meier plot for overall survival of NPS mice treated with ADT after palpable tumour was detected after 50 weeks (mock = 7; ADT = 6). After 50 weeks, palpable tumour was detected (black dotted line). The mice were then randomised into mock treatment or ADT treatment (red dotted line).
- E Representative images of prostate tumours (PT) from mock and ADT-treated NPS mice 1 month after ADT.
- F Representative images of prostate tumours from mock and ADT-treated NPS mice at clinical endpoints (~77–115 weeks).
- G IHC quantifications in NPS tumours ( $n = 3$  mice per group;  $*P < 0.05$ ; ANOVA Sidak's test).
- H Prostate tissue weights at 1 month following mock or ADT treatment in *Nkx3.1 Pten<sup>+/+</sup> Spry2<sup>+/+</sup>* wild-type (WT), *Nkx3.1 Pten<sup>fl/+</sup>* and *Nkx3.1 Spry2<sup>fl/+</sup>* mice ( $n = 3$  mice per group;  $*P < 0.05$  compared to respective mocks; ANOVA Sidak's test).
- I Representative immunostained images of mouse prostate sections from *Nkx3.1 Pten<sup>+/+</sup> Spry2<sup>+/+</sup>* wild-type (WT), *Nkx3.1 Pten<sup>fl/+</sup>* and *Nkx3.1 Spry2<sup>fl/+</sup>* mice 1 month following mock or ADT treatment. Scale bar = 10  $\mu\text{m}$ .
- J IHC quantifications for *Nkx3.1 Pten<sup>+/+</sup> Spry2<sup>+/+</sup>* wild-type (WT), *Nkx3.1 Pten<sup>fl/+</sup>* and *Nkx3.1 Spry2<sup>fl/+</sup>* mock- and ADT-treated control prostate sections ( $n = 3$  mice per group;  $*P < 0.05$  compared to respective mock controls; ANOVA Tukey's test).
- K Representative immunoblot images for indicated proteins from cell lysates of a panel of prostate cancer cell lines along with non-tumorigenic RWPE-1 prostate epithelial cells. HSC70 is used as loading control.

Data Information: In (B, C, G, H, J), each data point represents one independent sample. In (B, G, H, J), the data are presented as mean  $\pm$  SD. Source data are available online for this figure.

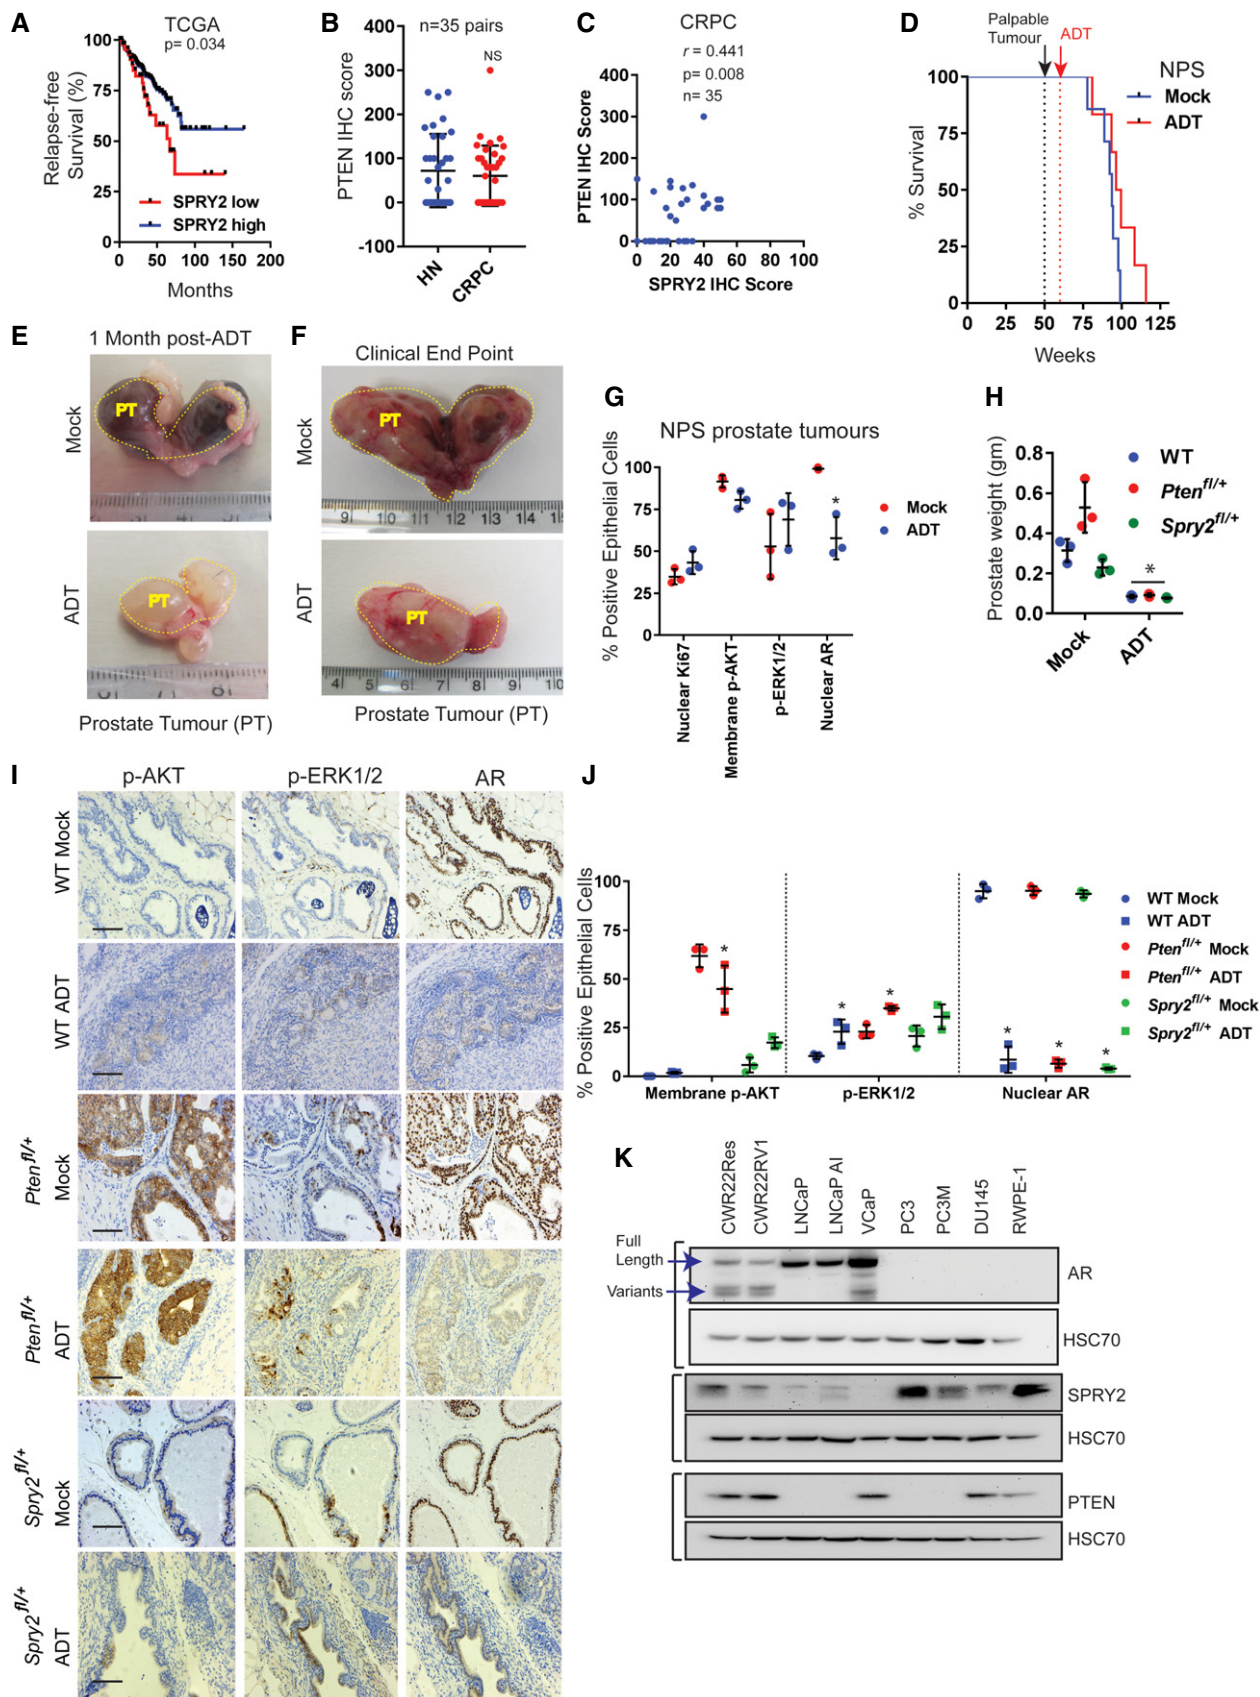

Figure EV1.

**Figure EV2. SPRY2 deficiency leads to CRPC.**

- A Representative immunoblot images for indicated proteins from cell lysates of control and SPRY2-overexpressing LNCaP cells. HSC70 is used as loading control.
- B Relative levels of AR full-length and AR-V7 transcripts in indicated cell lines ( $n = 3$ ;  $*P < 0.05$  ANOVA Sidak's test).
- C Growth rate of CWR22Res and CWR22RV2 cells relative to Day 0 (T0) in hormone-proficient (FBS) medium and hormone-depleted (CSS) medium ( $n = 3$ ;  $*P < 0.05$ ; ANOVA Sidak's test).
- D The relative quantitation of SPRY2 mRNA in CWR22Res prostate cancer cells stably transfected with non-silencing scrambled shRNA (Nsi) and shRNA targeting SPRY2 (CL3 and Pool SPRY2 knockdown clones) ( $n = 3$ ;  $*P < 0.05$  compared to Nsi; ANOVA Dunnett's test).
- E Ultrasound-based CWR22Res prostate orthograft tumour volume measurements. Each animal is represented by single line and each observation by a data point ( $n = 5$  mice per group;  $*P < 0.05$  at 60 days' time point; ANOVA Sidak's test).
- F Representative ultrasound images of mock- and ADT-treated CWR22Res prostate orthografts (POs) at 60 days' time point (E). The dotted red lines highlight the POs. The cystic region observed in the ultrasound in ADT-treated orthograft may represent necrotic central core of the orthografts as shown in (K).
- G Approximately  $14 \times 10^6$  of CWR22Res-derived cells (Nsi and SPRY2 KD clones—CL3 and Pool, respectively) were injected in one of the anterior prostate lobes in CD-1 nude mice. At day 30 post-intra-prostatic injections, mice were randomised for further treatments with either sham surgical incision (mock) or androgen deprivation therapy (ADT) by bilateral orchiectomy based on the abdominal palpation for the tumour burden.
- H Kaplan–Meier plot for overall survival of CD-1 mice after intra-prostatic injection of CWR22Res prostate cancer cells (Nsi control or CL3/Pool SPRY2 KD clones). The mice were randomised and treated with sham surgery or ADT (by castration) at 30 days post-injections when the prostate orthografts were palpable. The clinical end point as per project licence was used as the measure for survival of the tumour-bearing mice. Yellow line indicates refined 60 days protocol defined from this experiment ( $n = 5$  mice per group;  $*P < 0.05$  between ADT-treated mice;  $^{\#}P < 0.05$  respective orthograft-bearing mock- versus ADT-treated mice; log-rank Mantel–Cox test).
- I Analysis of body weights without the weights of the respective orthografts following ADT and mock treatments ( $n = 5$  mice per group;  $*P < 0.05$  ANOVA Tukey's test).
- J Representative images of indicated CWR22Res orthografts from mock and ADT-treated mice ( $n = 5$  mice per group).
- K Representative images of prostate orthograft (intact and halved). The black dotted area in the halved prostate orthograft marks the necrotic core. Representative H&E images of a prostate orthograft depicting the use of image analyser for calculating the percentage of the necrotic area (red area) normalised to total tumour area (blue dotted area). Insert image shows necrotic area (NA) surrounding the tumour epithelium (TE). Scale bar =  $10 \mu\text{m}$ .
- L Relative levels of AR full-length and AR-V7 transcripts in Nsi control and CL3/Pool SPRY2 KD CWR22Res cell lines ( $n = 3$ ).
- M Representative immunoblot images for indicated proteins from cell lysates of CWR22Res orthografts. HSC70 is used as loading control.
- N Representative immunoblot images for indicated proteins from cell lysates of CWR22Res-derived cells with different SPRY2 and PTEN expression. GAPDH is used as loading control.
- O Relative survival measured by WST-1 assay in CWR22Res cells with transient knockdown of PTEN grown in CSS-containing medium ( $n = 3$ ;  $*P < 0.05$  compared to Nsi siCTRL;  $^{\#}P < 0.05$  compared to Nsi siPTEN; ANOVA Tukey's test).

Data Information: In (E, I), each data point represents one independent observation. In (C), each data point is mean of three independent observations. In (B–D, I, L, O), the data are presented as mean  $\pm$  SD.

Source data are available online for this figure.

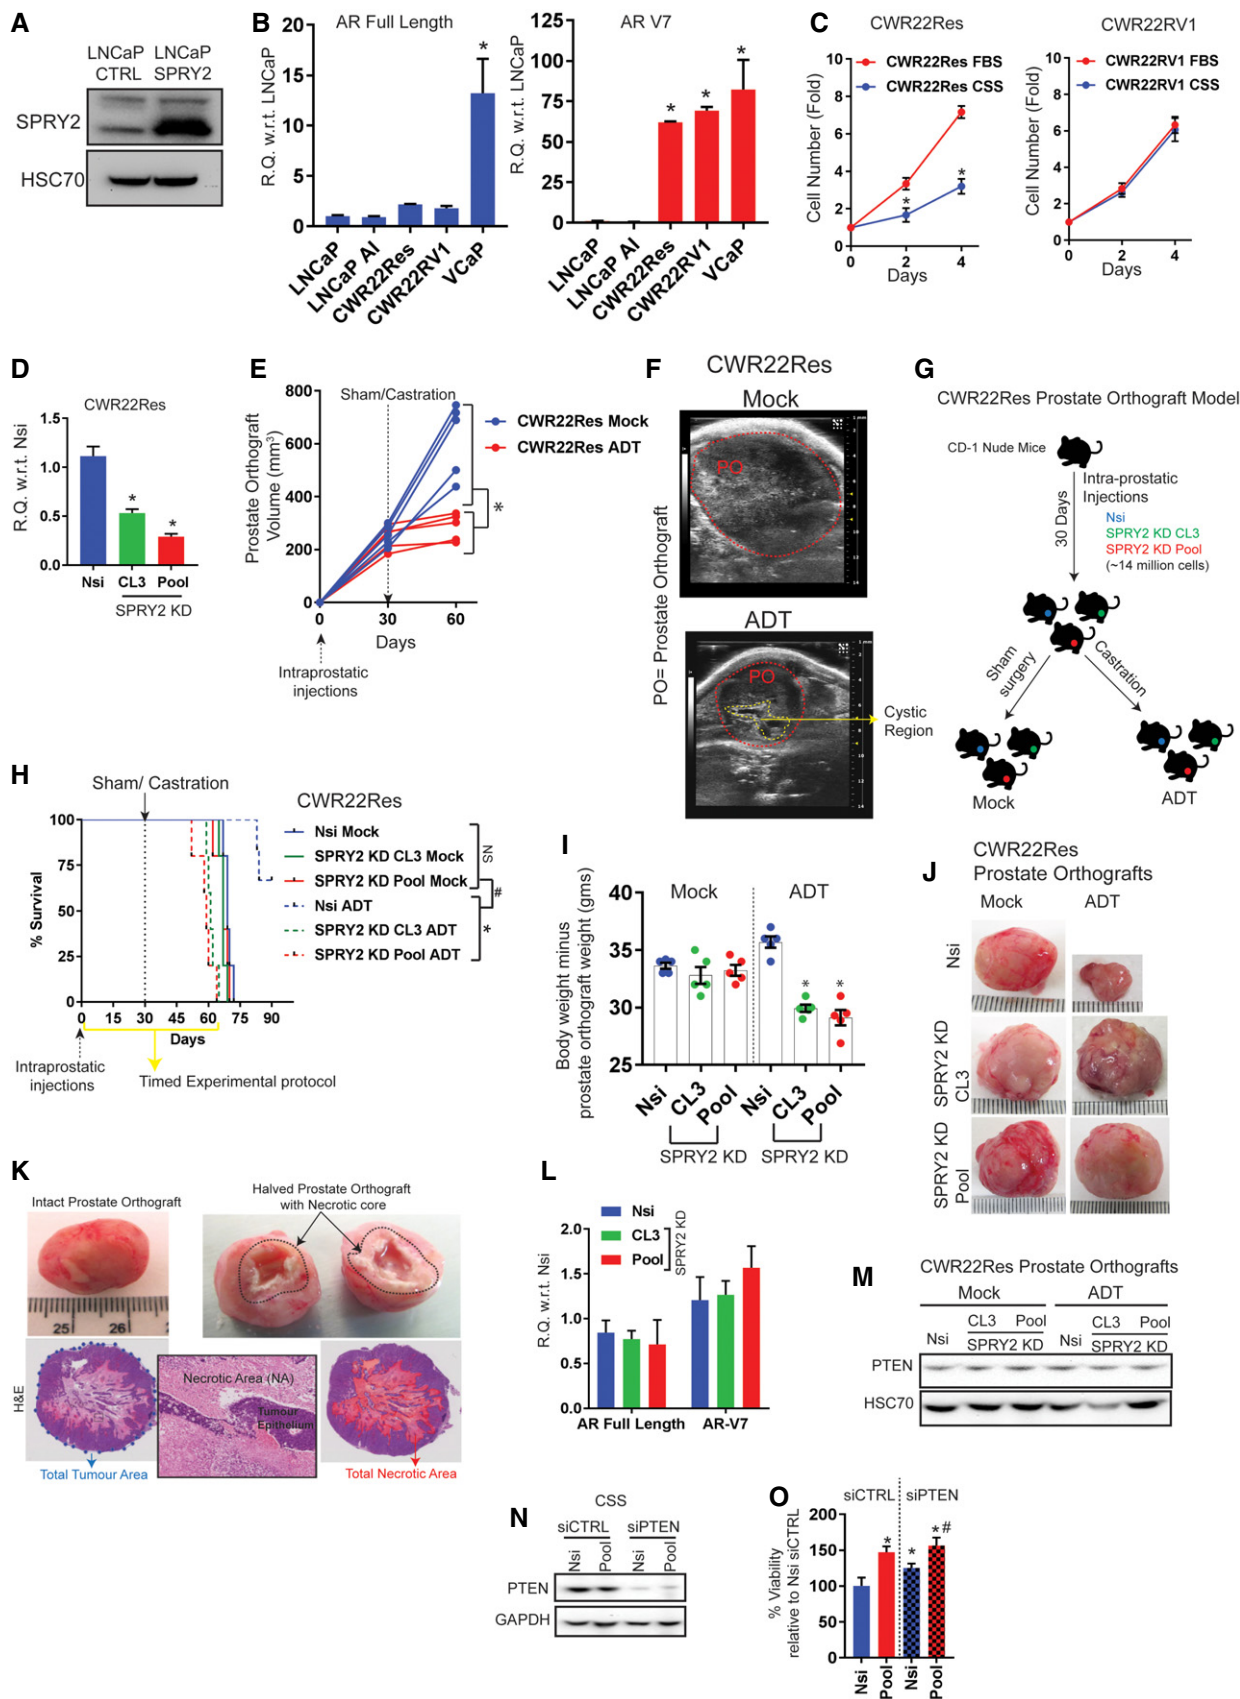

Figure EV2.

**Figure EV3. SPRY2 deficiency mediates androgen autonomous CRPC.**

- A Representative images of indicated CWR22Res prostate orthograft sections immunostained for AR and the apoptotic marker cleaved caspase 3 from mock- or ADT-treated mice ( $n = 3$  mice analysed per group; scale bar = 10  $\mu\text{m}$ ).
- B IHC quantification of indicated markers as presented in (A) ( $n = 3$  mice analysed per group;  $*P < 0.05$  compared to respective mock controls;  $^{\#}P < 0.05$  compared to all groups ANOVA Sidak's test).
- C Relative quantitation of human HSD3B1, CYP17A1 and HSD17B1 mRNA in CWR22Res Nsi control and SPRY2 KD clones (CL3 and Pool) cells ( $n = 3$ ;  $*P < 0.05$ ; unpaired two-tailed Student's  $t$ -test).
- D Representative immunoblot images for HSD3B1 from cell lysates of indicated CWR22Res cells. HSC70 is used as loading control.
- E Relative quantitation of human CYP17A1 mRNA in CWR22Res prostate orthografts ( $n = 3$ ).
- F Representative immunoblot images for HSD3B1 from tumour lysates from mock- and ADT-treated NPS mice. HSC70 is used as loading control.
- G Relative quantitation of human HSD3B1, CYP17A1 and HSD17B1 mRNA in control and SPRY2-expressing LNCaP cells ( $n = 3$ ;  $*P = 0.0069$ ; unpaired two-tailed Student's  $t$ -test).
- H Representative immunoblot images for HSD3B1 from VCaP prostate orthograft lysates from castrated (ADT) and uncastrated (control) mice. HSC70 is used as loading control.
- I, J Growth rate of (I) control and SPRY2-expressing LNCaP cells & (J) Nsi control and Pool SPRY2 KD CWR22Res cells relative to Day 0 (T0) in hormone-proficient (FBS) medium and hormone-depleted (CSS) medium ( $n = 3$ ;  $*P < 0.05$ ; ANOVA Tukey's test).
- K Representative immunoblot images for HSD3B1 from indicated CWR22Res cells with HSD3B1 knockout. HSC70 is used as loading control.
- L Growth rate of Nsi control and Pool SPRY2 KD CWR22Res cells with HSD3B1 knockout relative to Day 0 (T0) in hormone-proficient (FBS) medium.
- M Testosterone measured using ELISA in indicated CWR22Res-derived cells with HSD3B1 knockout grown in medium with 10% FBS or 10% CSS (hormone-depleted serum) ( $n = 3$ ;  $*P < 0.05$  compared to Nsi FBS ANOVA Dunnett's test).
- N Representative immunoblot images for indicated proteins from cell lysates of indicated prostate cancer cell lines and non-tumorigenic RWPE-1 cells. HSC70 is used as loading control.
- O Relative quantitation of HER2 mRNA in Nsi and Pool (SPRY2 KD) CWR22Res prostate cancer cells with stable expression of shSc (shScram) or shHER2 ( $n = 3$ ;  $*P < 0.05$  shHER2 compared to respective shSc; unpaired two-tailed Student's  $t$ -test).

Data Information: In (B, E), each data point represents one independent observation. In (I, J, L), each data point is mean of three independent observations. In (B, C, E, G, I, J, L, M, O), the data are presented as mean  $\pm$  SD.

Source data are available online for this figure.

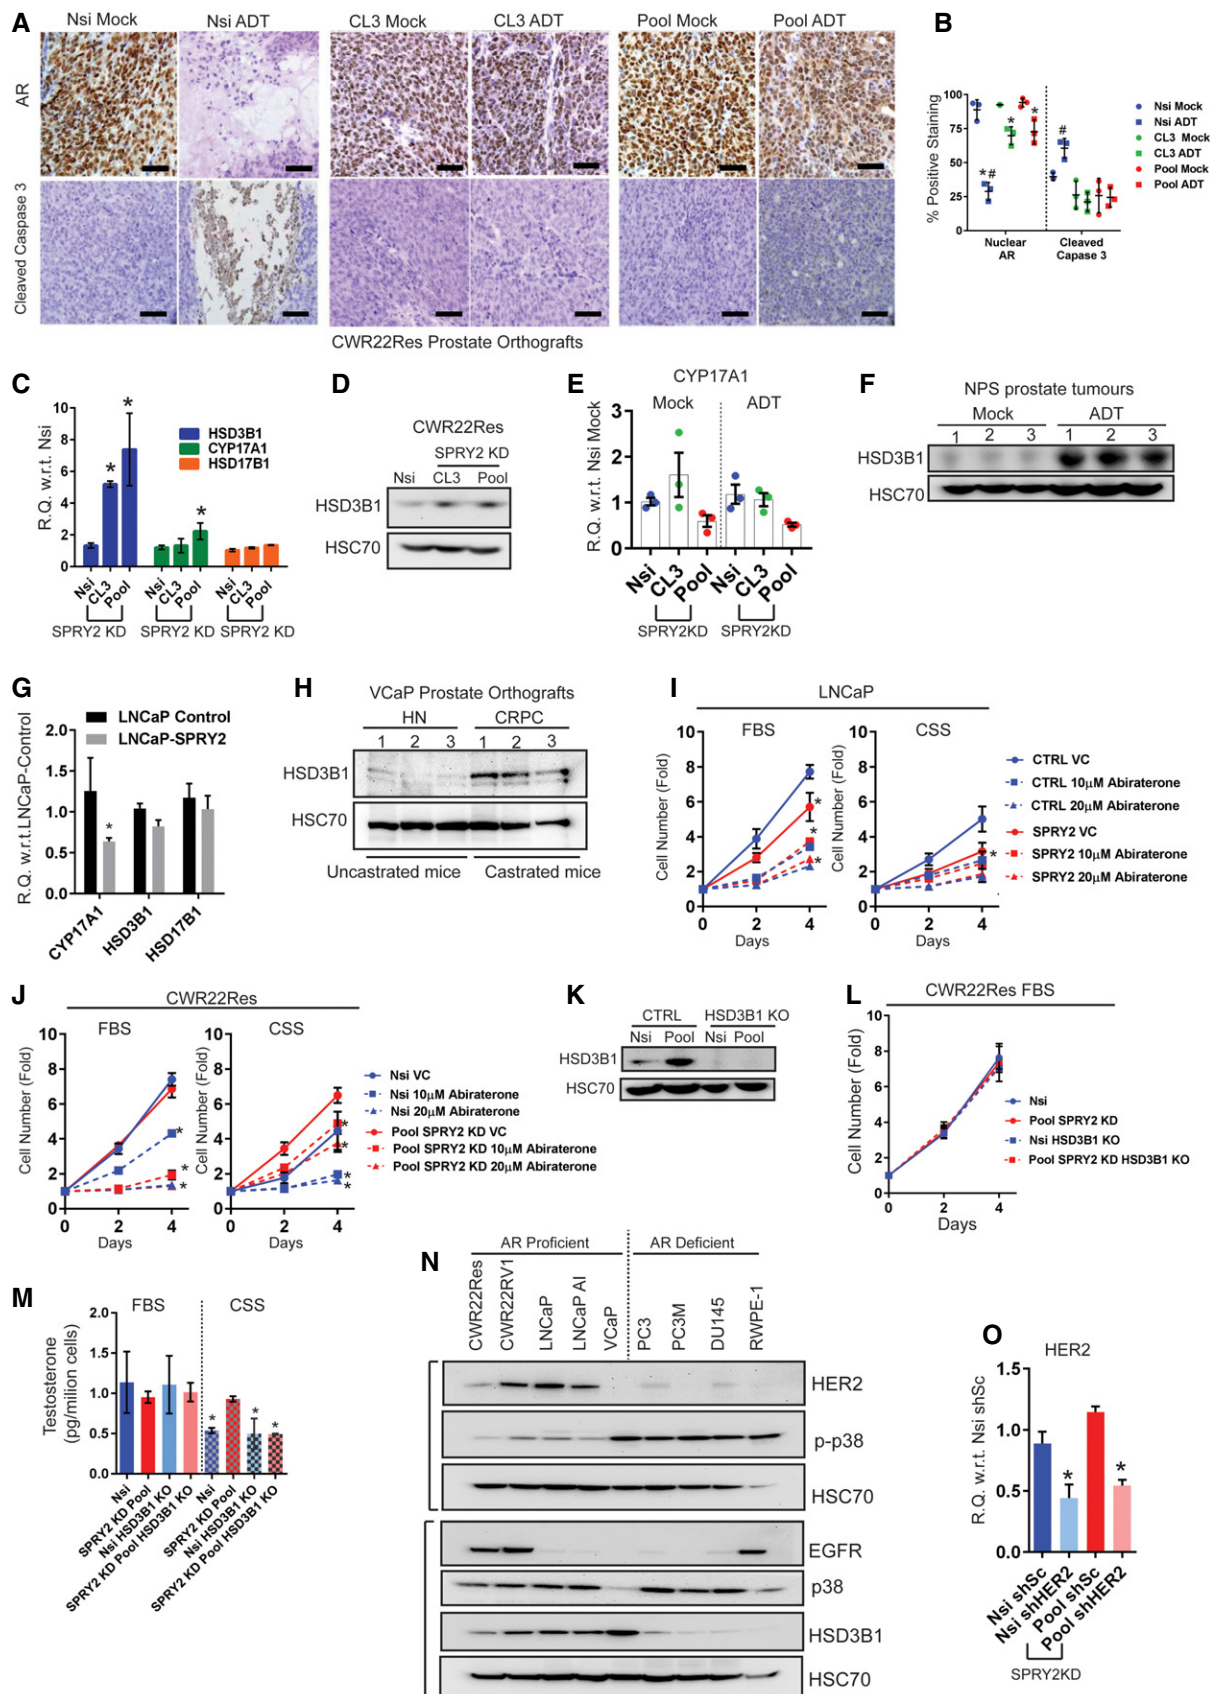

Figure EV3.

**Figure EV4. SPRY2 deficiency-induced IL6 drives CRPC by elevating tumoral HSD3B1 and cholesterol levels.**

- A Human cytokine arrays probed with lysates from Nsi and SPRY2 KD (Pool) CWR22Res prostate orthografts ( $n = 2$ ). Red boxes highlight the location for IL6 detection.
- B Relative quantitation of IL6 mRNA in control and SPRY2-expressing LNCaP cells ( $n = 3$ ;  $*P = 0.0498$ ; unpaired two-tailed Student's  $t$ -test).
- C Representative immunoblot images for indicated proteins from cell lysates of indicated prostate cancer cell lines. For the lower panel, lysates were from cells treated for 16 h with the p38 inhibitor SB203580 (20  $\mu$ M). HSC70 is used as loading control.
- D Representative IL6 immunostained images of clinical hormone-naïve and castration-resistant (CRPC) prostate cancer samples ( $n = 35$ ). Scale bars = 100  $\mu$ m.
- E Scatter plot showing correlation of SPRY2 and IL6 IHC scores in CRPC patients with evidence of biochemical relapse.
- F Relative quantitation of IL6 mRNA in indicated cell lines. LNCaP, CWR22Res and DU145 cells were cultured in RPMI medium with 10% FBS. CWR22RV1 cells were cultured in RPMI medium with 10% CSS (hormone-deficient conditions) ( $n = 3$ ;  $*P < 0.05$  ANOVA Tukey's test).
- G Relative quantitation of HSD3B1 mRNA in CWR22Res cells cultured in serum-free medium with and without 100 pmol/ml hIL6 treatment for 24 h ( $n = 3$ ;  $*P = 0.0222$ ; unpaired two-tailed Student's  $t$ -test).
- H Relative quantitation of IL6 and HSD3B1 mRNA in Pool (SPRY2 KD clone) CWR22Res cells treated with control or anti-IL6-neutralising antibody (0.1  $\mu$ g/ $\mu$ l) for 16 h ( $n = 3$ ;  $*P < 0.05$ , anti-IL6 compared to respective ctrl IgG; unpaired two-tailed Student's  $t$ -test).
- I Representative immunoblot images for indicated proteins in lysates from indicated CWR22Res orthografts.
- J Representative images of indicated CWR22Res prostate orthograft sections immunostained for AR and apoptotic marker cleaved caspase 3 from mock or ADT-treated mice ( $n = 3$  mice analysed per group; scale bar = 10  $\mu$ m).
- K IHC quantification of indicated markers as presented in (J) ( $n = 3$  mice analysed per group;  $*P < 0.05$  compared to respective mock controls;  $^{#}P < 0.05$  compared to respective ADT controls ANOVA Tukey's test).
- L Representative H&E and immunostained images of prostate sections from ADT-treated NPS mice with and without anti-IL6 treatment ( $n = 3$  mice analysed per group; scale bar = 10  $\mu$ m).
- M IHC quantification of indicated markers as presented in (L) ( $n = 3$  mice analysed per group;  $*P < 0.05$  compared to respective controls; unpaired two-tailed Student's  $t$ -test).

Data Information: In (E), each data point represents one observation. In (K, M), each data point represents one independent observation with error bars as SD. In (B, F–H, K, M), the data are presented as mean  $\pm$  SD.  
Source data are available online for this figure.

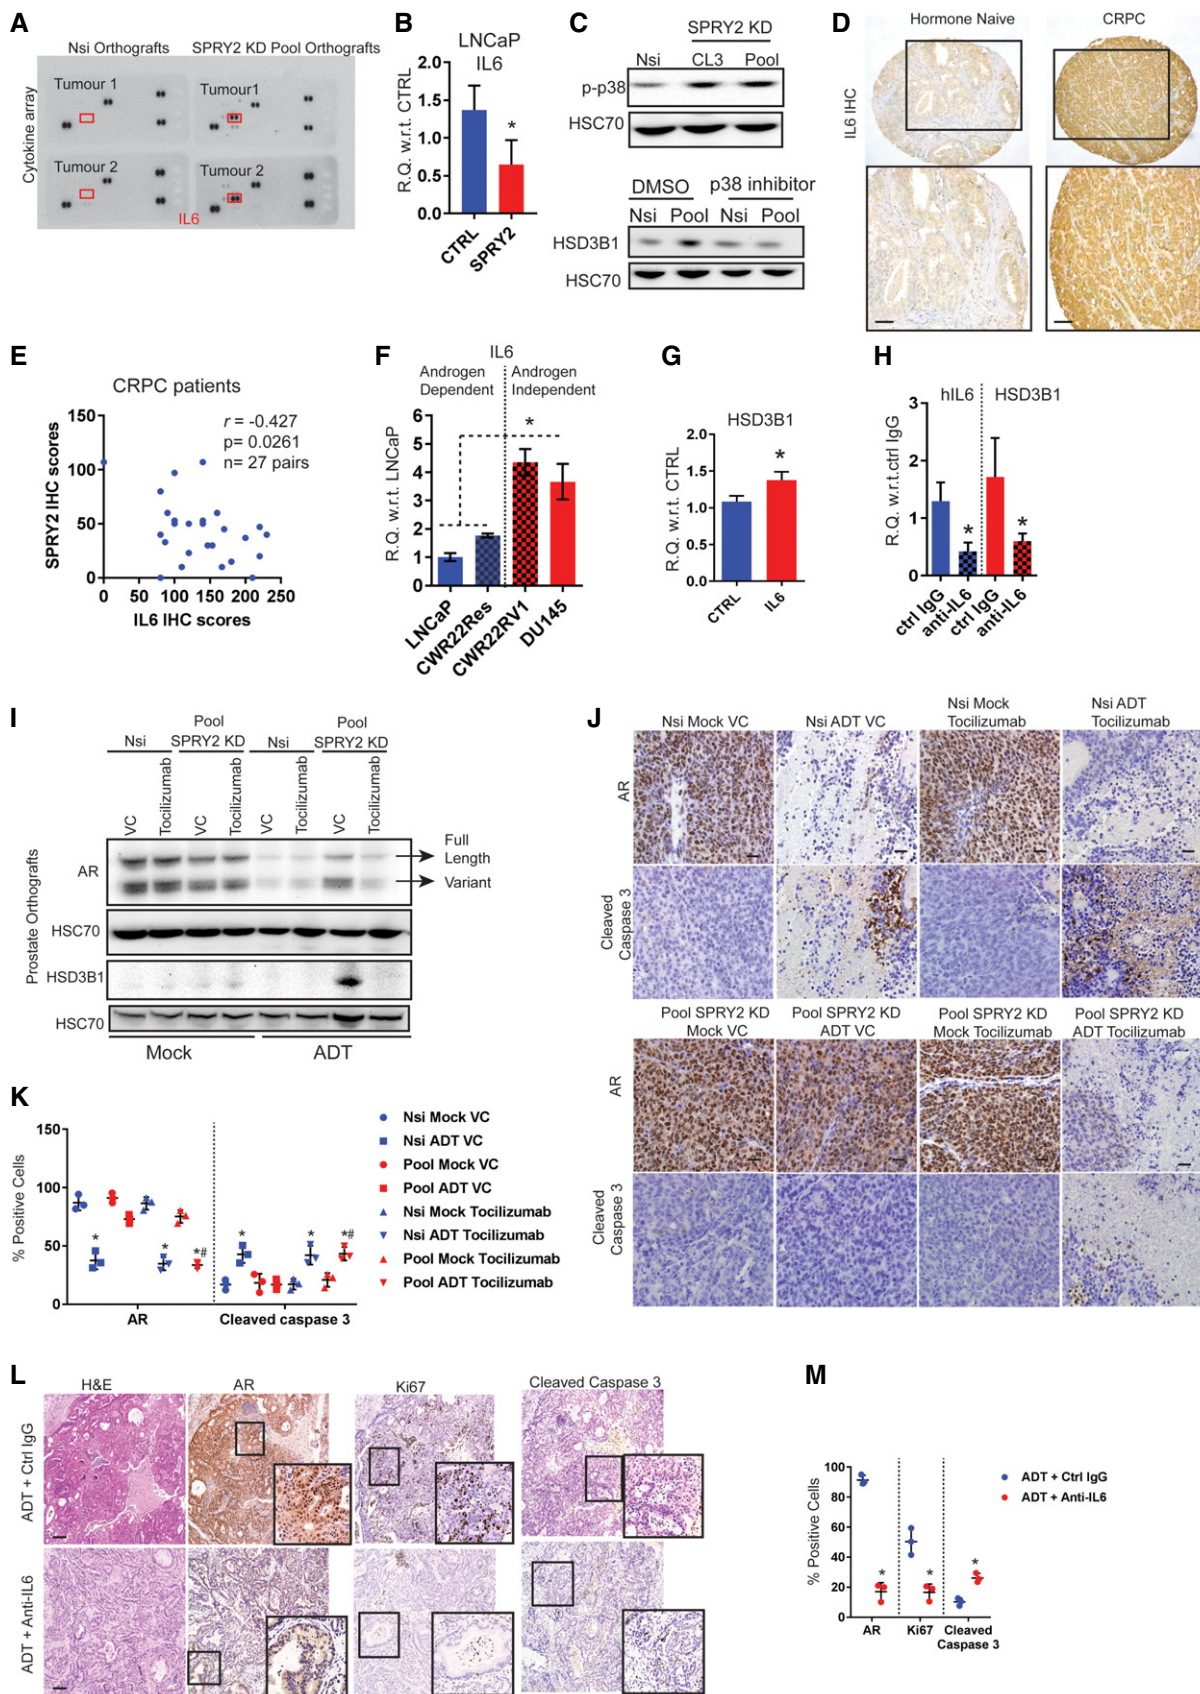

Figure EV4.



**Figure EV5. Targeting SRB1 in CRPC.**

- A, B Representative immunoblot image for indicated proteins in whole cell lysates from control and SRB1 knockout (KO) cells derived from (A) Nsi control and SPRY2-deficient (Pool) cells and (B) CWR22Res cells. GAPDH is used as the loading control.
- C The cytotoxic effects of SRB1 antagonist ITX5061 relative to DMSO on CWR22Res control and SRB1 KO cells cultured for 48 h in RPMI with 10% charcoal-stripped serum (CSS) mimicking hormone-deprived (ADT) conditions. IC50 calculated using log (inhibitor) versus response – Variable slope (four parameters) with bottom constraint = 0.0 with GraphPad Prism software. IC50 of ITX5061 in CWR22Res control =  $23.87 \pm 0.677$  and CWR22Res SRB1KO = not calculated due to lack of response ( $n = 3$ ; IC50 data presented as mean  $\pm$  SD).
- D LDL uptake in indicated cells grown in medium with 10% FBS (FM) or 10% charcoal-stripped serum (ADT) treated with 15  $\mu$ M ITX5061 ( $n = 3$ ).
- E Relative fluorescence in LNCaP (maintained in 10% FBS containing medium) and LNCaP AI (androgen-independent LNCaP cells maintained in 10% CSS-containing medium) treated with HDL or LDL bound to 1,1'-dioctadecyl-3,3,3',3'-tetramethylindocarbocyanine perchlorate (Dil) [Dil-HDL or Dil-LDL] ( $n = 3$ ).
- F Relative fluorescence in VCaP prostate cancer cells treated with HDL or LDL bound to 1,1'-dioctadecyl-3,3,3',3'-tetramethylindocarbocyanine perchlorate (Dil) [Dil-HDL or Dil-LDL] in medium containing 10% FBS or 10% CSS ( $n = 3$ ; \* $P = 0.0073$  compared to HDL treatment in FBS; unpaired two-tailed Student's *t*-test).
- G–I Relative fluorescence in LNCaP (G), VCaP (H) and CWR22RV1 (I) cells treated with ITX5061 and HDL bound to 1,1'-dioctadecyl-3,3,3',3'-tetramethylindocarbocyanine perchlorate (Dil) [Dil-HDL] ( $n = 3$ ; \* $P < 0.05$  compared to HDL treatment in FBS; unpaired two-tailed Student's *t*-test).
- J % Cholesterol efflux induced by human serum from Nsi control and SPRY2 KD (Pool) CWR22Res with SRB1 knockout (KO) as indicated in presence of 15  $\mu$ M ITX5061 ( $n = 3$ ; \* $P < 0.05$  compared to Nsi control DMSO; # $P < 0.05$  compared to Nsi control ITX5061; ANOVA Tukey's test).
- K Growth rate of control and SPRY2-expressing LNCaP cells relative to Day 0 (T0) in medium containing 10% CSS (hormone deficient) with indicated ITX5061 treatments ( $n = 3$ ; \* $P < 0.05$  compared to LNCaP CTRL; # $P < 0.05$  compared to LNCaP SPRY2; ANOVA Tukey's test).
- L Growth rate of CWR22RV1 (CRPC) cells relative to T0 in medium containing 10% CSS (hormone deficient) with indicated ITX5061 treatments ( $n = 3$ ; \* $P < 0.05$  ANOVA Tukey's test).
- M Representative images ( $n = 5$ ) of CWR22Res prostate orthograft sections immunostained for AR and cleaved caspase 3 from mock- or ADT-treated mice. Scale bar = 10  $\mu$ m.
- N IHC quantification of indicated markers as presented in (M) ( $n = 3$  mice analysed per group; \* $P < 0.05$  compared to respective controls; unpaired two-tailed Student's *t*-test).
- O Representative immunoblot images for indicated proteins in lysates from indicated CWR22Res orthografts.

Data Information: In (C, K, L), each data point represents mean with observation with error bars as SD. In (D–I), the data are presented as mean  $\pm$  SD. In (N), data represented as mean.

Source data are available online for this figure.

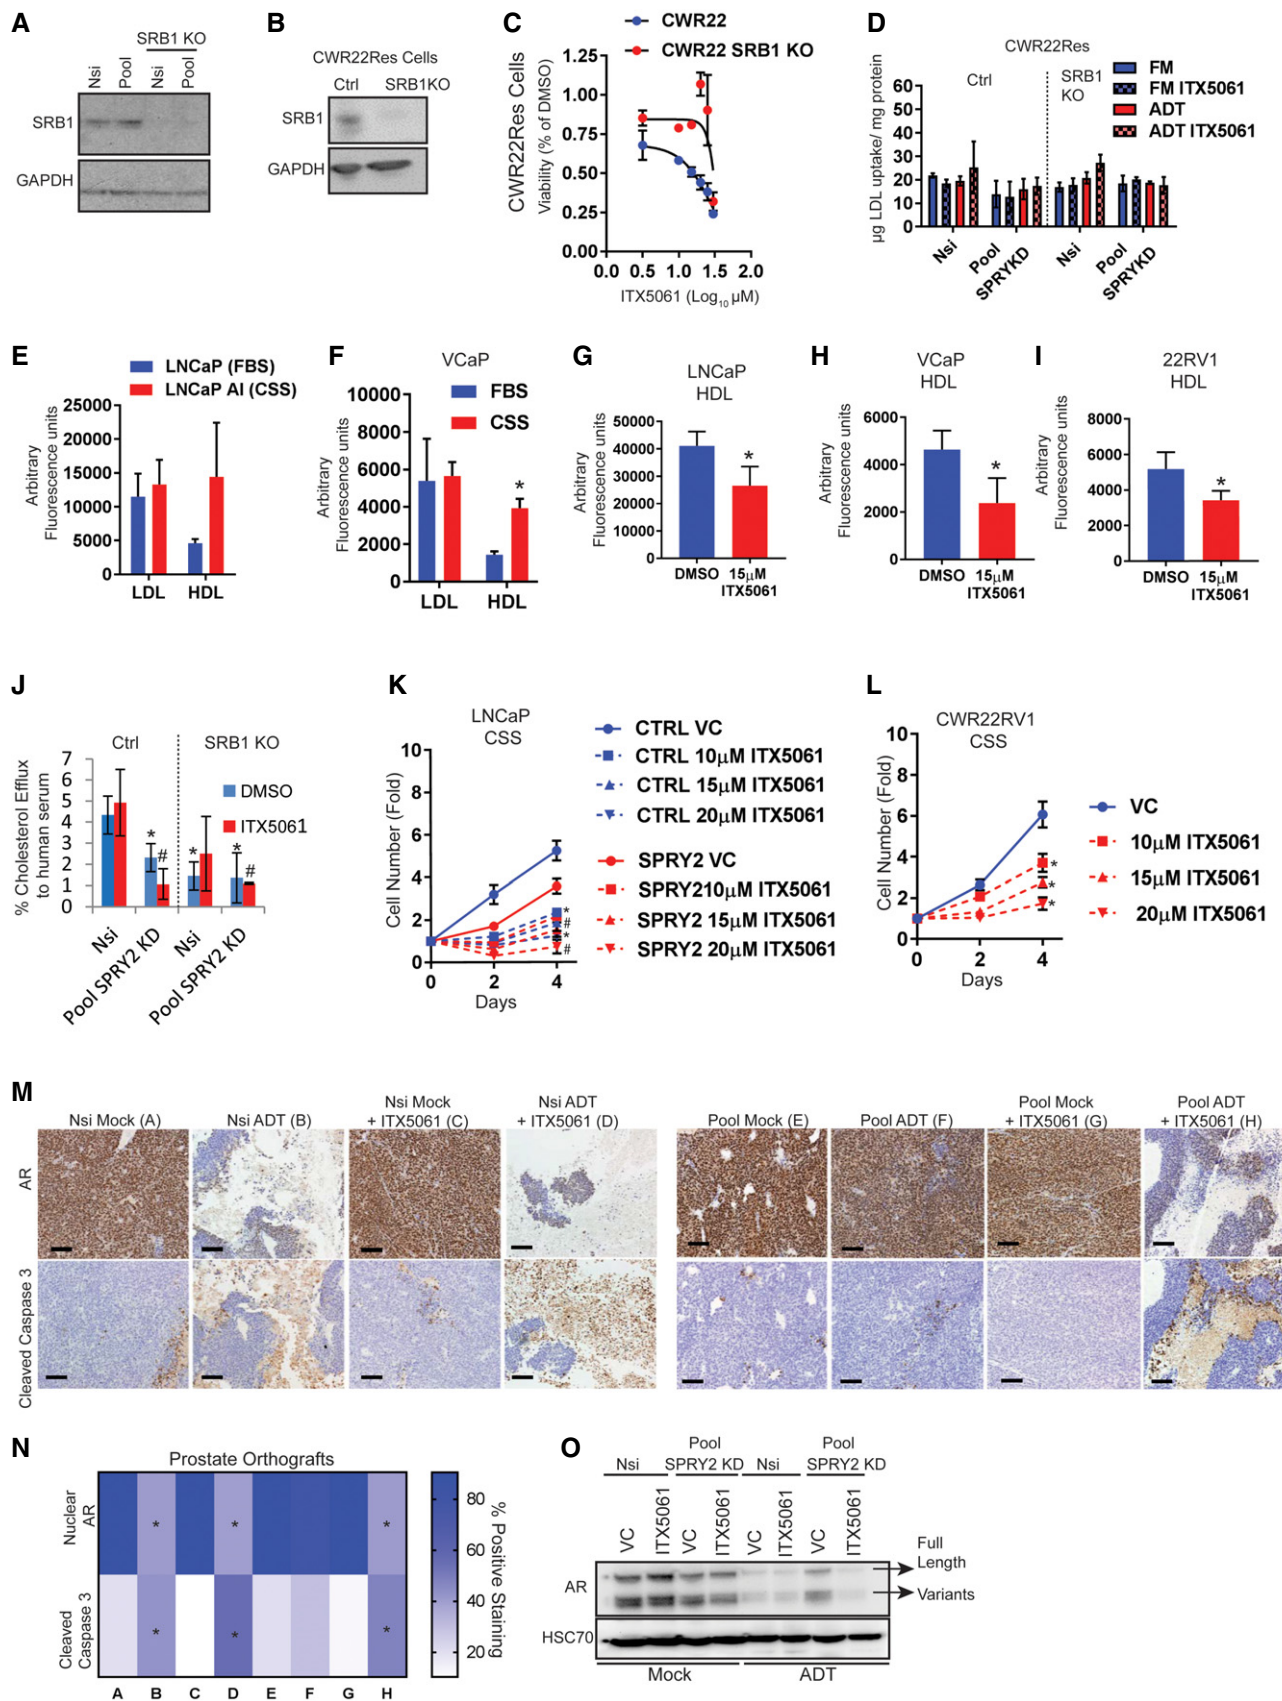

Figure EV5.
