# Supplementary material for: Sprouty2 loss‐induced IL6 drives castration‐resistant prostate cancer through scavenger receptor B1
Source: PubMed Central journal article supplement (PMC5887544; doi:10.15252/emmm.201708347), 2018-03-14
Supplement: EMMM-10-e8347-s003.pdf [file EMMM-10-e8347-s003.pdf]

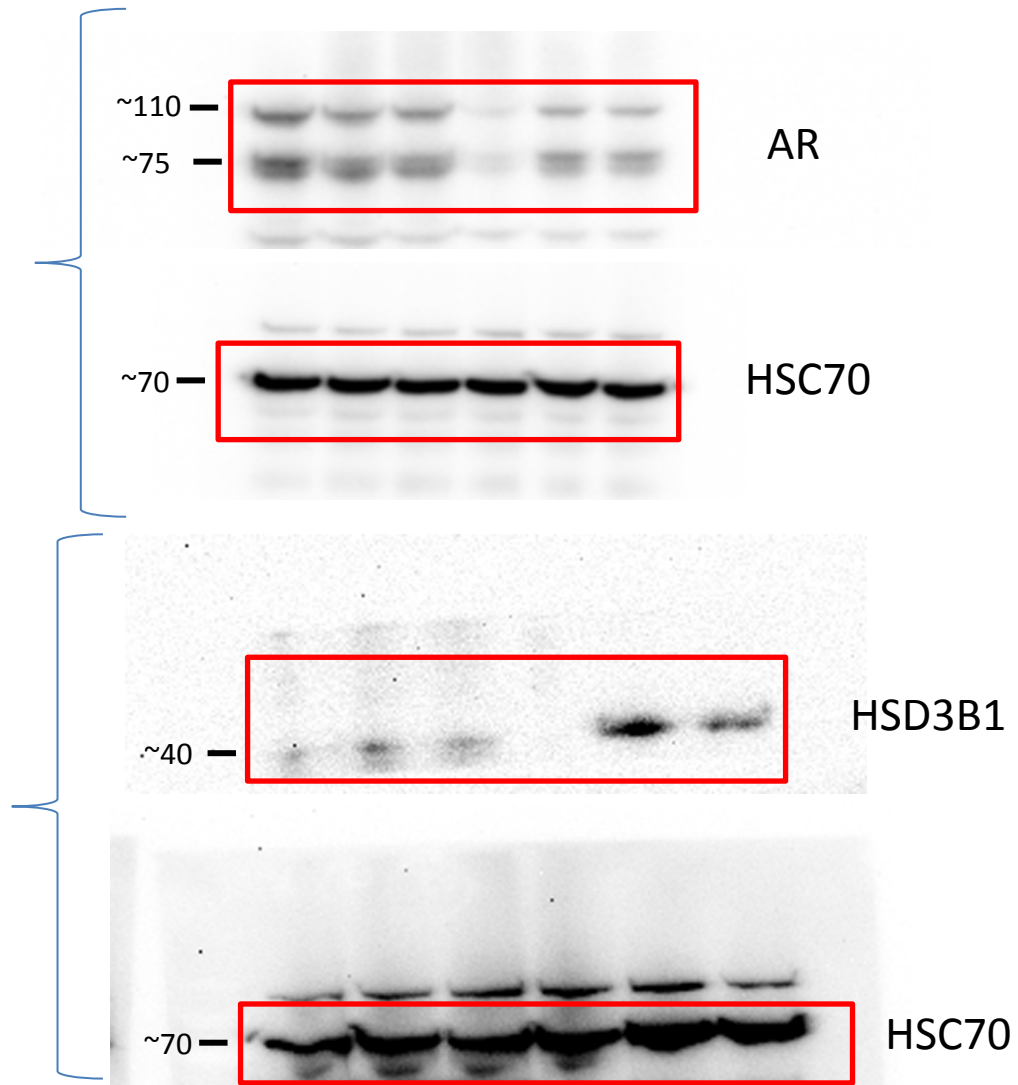

Fig 2A

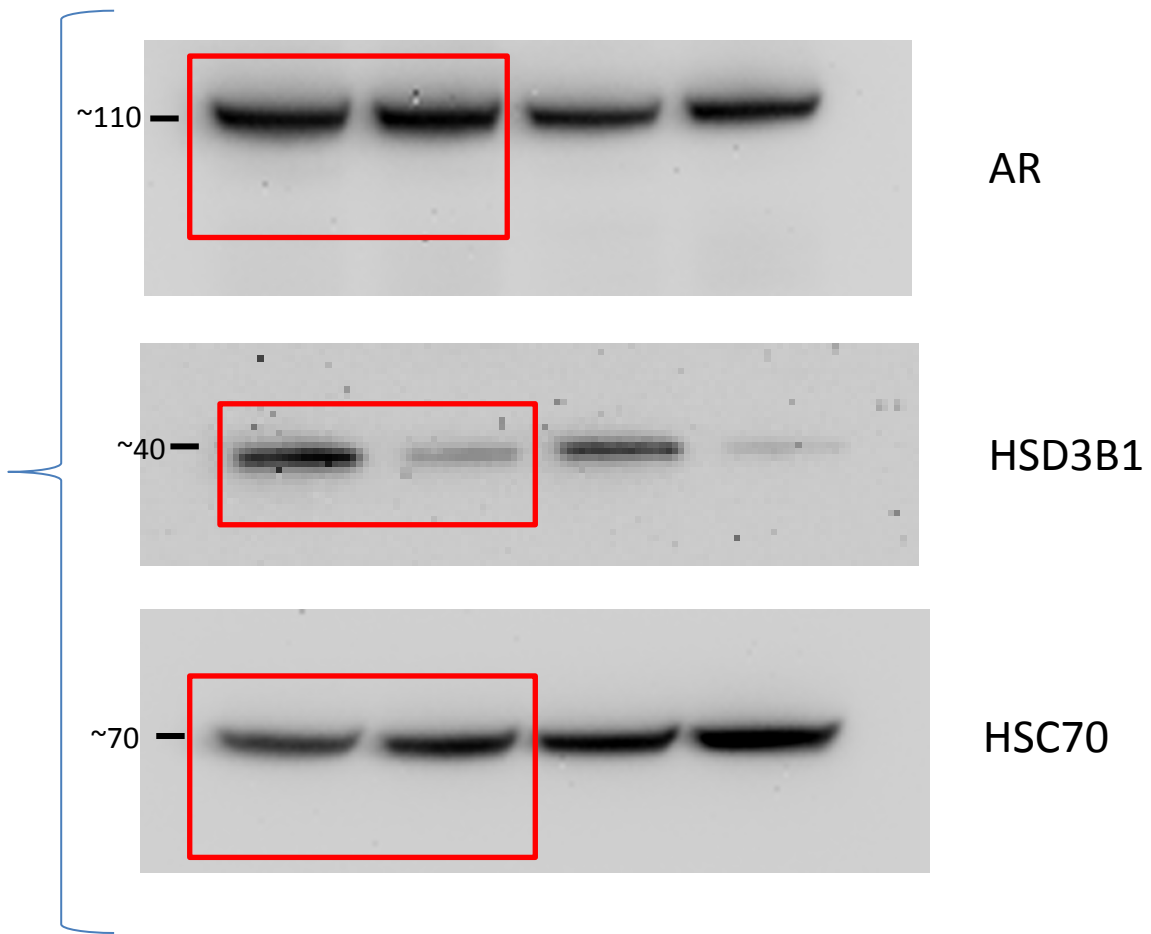

Fig 21

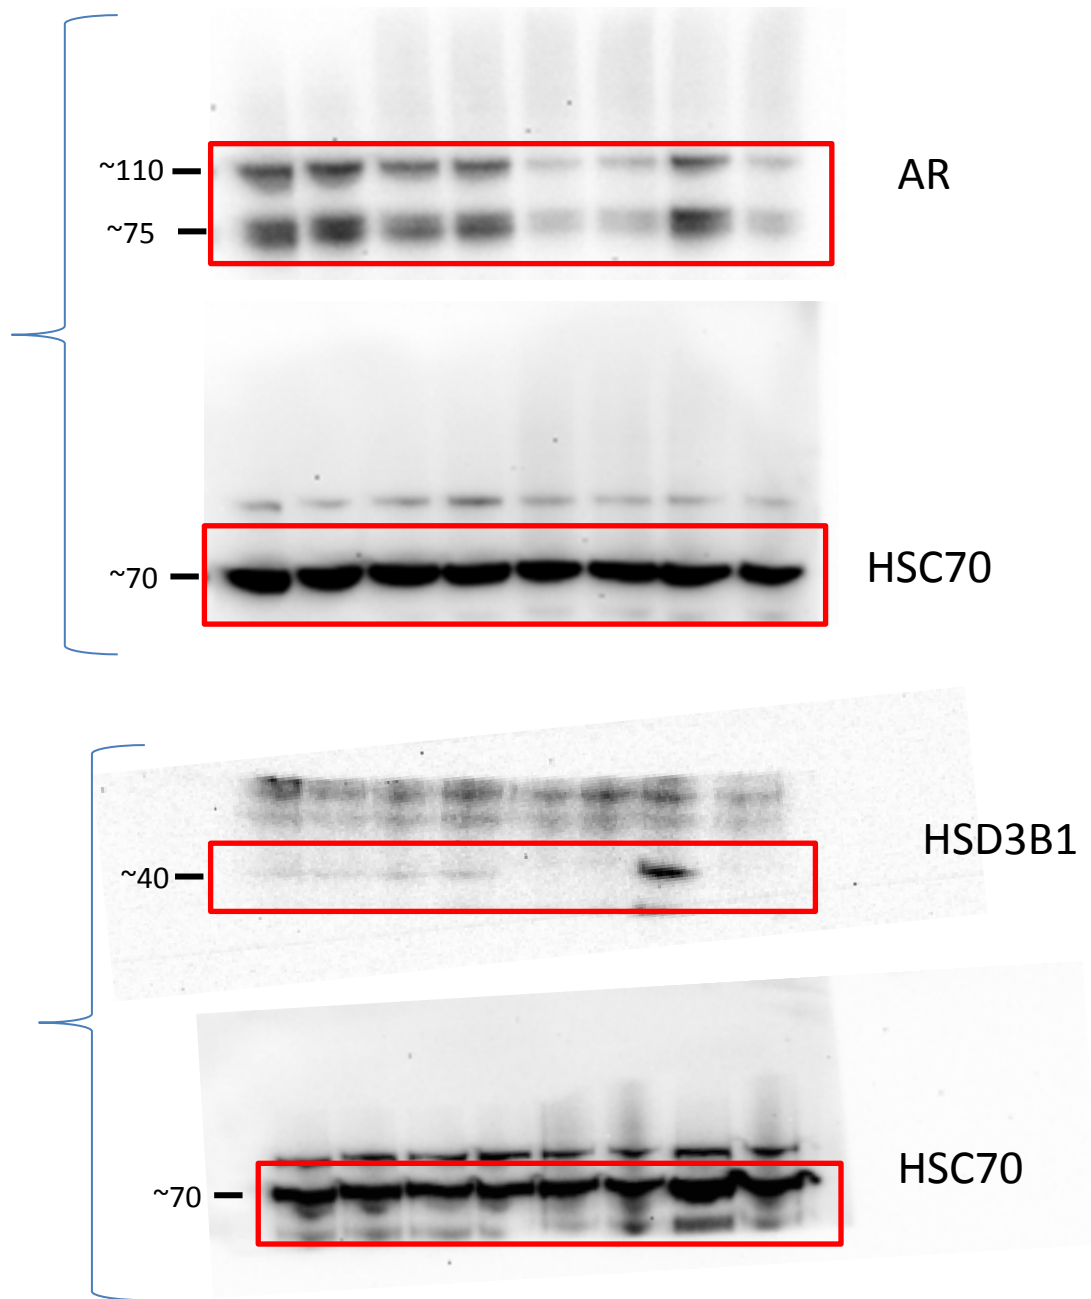

Fig 2N
